# Supplementary material
Source: bioRxiv or medRxiv preprint supplement (https://medrxiv.org/highwire/filestream/96059/field_highwire_adjunct_files/0/2020.09.08.20190231-1.pdf)
Supplement: Supplementary file [file 2020.09.08.20190231-1.pdf]

## **Patterns of age disparities in colon and lung cancer survival: a systematic narrative literature review**

Sophie Pilleron, Helen Gower, Maryska Janssen-Heijnen, Virginia Signal, Jason Gurney, Eva JA Morris, Ruth Cunningham, Diana Sarfati

### **Table of content**

Supplementary Table 1. Key concepts and search terms

Supplementary Table 2. Supplementary search strategy implemented in EMBASE

Supplementary Table 3. PICO criteria

Supplementary Table 4. Excluded studies (ordered by year)

Supplementary Table 5. Numerical estimates for survival metrics extracted from included studies about colon cancer

Supplementary Table 6. Numerical estimates for survival metrics extracted from included studies about lung cancer

**Supplementary Table 1.** Key concepts and search terms

| <b>Key concepts</b> | <b>Search terms</b>                                                                                                                                                       |
|---------------------|---------------------------------------------------------------------------------------------------------------------------------------------------------------------------|
| cancer              | cancer OR neoplasm* OR tumour* OR tumor* OR malignan* OR carcinom* OR adenocarcinom* OR sarcom*                                                                           |
| colon               | colon* OR colorect* OR colo-rect* OR colorrect* OR intestin*                                                                                                              |
| lung                | bowel OR lung* OR pulmon* OR respirat* OR bronch*                                                                                                                         |
| survival            | survival OR surviving OR survive* OR mortalit* OR death* OR "hazard rate" OR "hazard ratio"                                                                               |
| Older patients      | elder* OR "oldest old" OR "older patients" OR "older adults" OR "old age" OR aging OR ageing OR geriatr* OR geronto* OR octogenarian* OR septuagenarian* OR nonagenarian* |

**Supplementary Table 2.** Supplementary search strategy implemented in EMBASE

- 1 exp colon cancer/
- 2 exp lung cancer/
- 3 ((colon\* or colorect\* or colo-rect\* or colorrect\* or intestin\* or bowel or lung\* or pulmon\* or respirat\* or bronch\*) adj5 (cancer\* or neoplas\* or carcinom\* or adenocarcinom\* or sarcom\* or malignan\* or tumor\* or tumour\*)).tw.
- 4 1 or 2 or 3
- 5 exp survival/
- 6 mortality/ or all cause mortality/ or cancer mortality/ or hospital mortality/ or exp mortality rate/ or standardized mortality ratio/ or surgical mortality/
- 7 (survival or surviving or survive\* or mortalit\* or death\* or "hazard rate\*" or "hazard ratio\*").tw.
- 8 5 or 6 or 7
- 9 4 and 8
- 10 (elder\* or "oldest old" or "older adult\*" or "old age" or "older patients" or aging or geriatr\* or geronto\* or octogenarian\* or septuagenarian\* or nonagenarian\*).ti,ab.
- 11 9 and 10
- 12 limit 11 to english
- 13 limit 12 to (clinical trial or randomized controlled trial or controlled clinical trial or multicenter study or phase 1 clinical trial or phase 2 clinical trial or phase 3 clinical trial or phase 4 clinical trial)
- 14 12 not 13
- 15 limit 14 to (article or article in press or letter)
- 16 "cancer registr\*".tw.
- 17 "population-based".tw.
- 18 17 or 16
- 19 15 and 18

**Supplementary Table 3. PICO criteria**

| <b>Element</b>                              | <b>Inclusion Criteria</b>                                            | <b>Exclusion Criteria</b>                                                                                                                                                                            |
|---------------------------------------------|----------------------------------------------------------------------|------------------------------------------------------------------------------------------------------------------------------------------------------------------------------------------------------|
| <i>Participant</i>                          | Adult patients with colon or lung cancer                             | Animal studies<br>Papers focused only on patients under the age of 65                                                                                                                                |
| <i>Intervention or exposure of interest</i> | Older age<br>Increasing age                                          |                                                                                                                                                                                                      |
| <i>Comparator</i>                           | Middle-aged or younger-aged                                          | Papers that do not compare survival by age group, or did not investigate the impact of increasing age on survival                                                                                    |
| <i>Outcome</i>                              | Survival or mortality risk                                           |                                                                                                                                                                                                      |
| <i>Study design</i>                         | Population-based                                                     | Clinical studies and clinical trials because of the strict inclusion criteria and underrepresentation of older adults in trials. Studies where no association between age and survival are reported. |
| <i>Article type</i>                         | Original articles or letters                                         | Conference abstracts and reviews                                                                                                                                                                     |
| <i>Language</i>                             | English                                                              |                                                                                                                                                                                                      |
| <i>Study period</i>                         | From the inception of each electronic databases to 30 September 2019 |                                                                                                                                                                                                      |

**Supplementary Table 4.** Excluded studies (ordered by year)

| <b>Cancer site</b> | <b>Origin</b>    | <b>First author, date</b> | <b>Title</b>                                                                                                                                                      | <b>Reason for exclusion</b>                                                             |
|--------------------|------------------|---------------------------|-------------------------------------------------------------------------------------------------------------------------------------------------------------------|-----------------------------------------------------------------------------------------|
| Both sites         | Databases        | Gafa et al., 1991         | Survival of patients with cancer of the stomach, colon and rectum, lung and breast in Ragusa, Sicily                                                              | No investigation of determinants of age difference                                      |
| Colon/Colorectum   | Databases        | Slattery et al., 1995     | The impact of family history of colon-cancer on survival after diagnosis with colon-cancer                                                                        | No distinction among 55 y+ and No investigation of age difference                       |
| Lung               | Databases        | Damhuis et al., 1996      | Resection rates and postoperative mortality in 7,899 patients with lung cancer                                                                                    | No investigation of determinants of age difference                                      |
| Colon/Colorectum   | Databases        | Crocetti et al., 1996     | Colorectal cancer survival - Population-based rates in the province of Florence                                                                                   | No investigation of determinants of age difference                                      |
| Colon/Colorectum   | Databases        | Monnet et al., 1998       | Comparability of colorectal cancer survival data in three European population-based registries                                                                    | No survival data by age                                                                 |
| Other cancer site  | Databases        | Lu-Yao et al., 1999       | Effect of age and surgical approach on complications and short-term mortality after radical prostatectomy - A population-based study                              | Not right topic at all                                                                  |
| Both sites         | Databases        | Teppo et al., 1999        | Cancer patient survival - Patterns, comparisons, trends - A population-based Cancer Registry study in Finland                                                     | More complete information in Dickman et al., 1999                                       |
| Lung               | References' list | Quon et al., 1999         | The influence of age on the delivery, tolerance, and efficacy of thoracic irradiation in the combined modality treatment of limited stage small cell lung cancer. | Data from randomised clinical trial                                                     |
| Lung               | Databases        | Kuo et al., 2000          | Non-small cell lung cancer in very young and very old patients                                                                                                    | No investigation of determinants of age difference in survival - comparison <40 vs. >80 |
| Both sites         | Databases        | Bradley et al., 2001      | Disparities in cancer diagnosis and survival                                                                                                                      | No investigation of age difference in survival                                          |

| Cancer site      | Origin           | First author, date         | Title                                                                                                                                           | Reason for exclusion                                                                                                                                                         |
|------------------|------------------|----------------------------|-------------------------------------------------------------------------------------------------------------------------------------------------|------------------------------------------------------------------------------------------------------------------------------------------------------------------------------|
| Colon/Colorectum | References' list | Mitry et al., 2001         | Colorectal adenocarcinoma in patients under 45 years of age: comparison with older patients in well-defined French population.                  | Comparison of <45 year vs. 45-74 years                                                                                                                                       |
| Colon/Colorectum | References' list | Schrag et al., 2001        | Age and adjuvant chemotherapy use after surgery for stage III colon cancer                                                                      | No investigation of determinants of age difference                                                                                                                           |
| Colon/Colorectum | Databases        | Faivre-Finn et al., 2002   | Colon cancer in France: evidence for improvement in management and survival                                                                     | No investigation of determinants of age difference in survival                                                                                                               |
| Lung             | Databases        | van Meerbeeck et al., 2002 | High postoperative risk after pneumonectomy in elderly patients with right-sided lung cancer                                                    | Not population-based data                                                                                                                                                    |
| Colon/Colorectum | References' list | Iwashyna TJ et al., 2002   | Effectiveness of adjuvant fluorouracil in clinical practice: a population-based cohort study of elderly patients with stage III colon cancer    | No investigation of determinants of age difference                                                                                                                           |
| Lung             | References' list | Ludbrook et al., 2003      | Do age and comorbidity impact treatment allocation and outcomes in limited stage small-cell lung cancer? a community-based population analysis. | No investigation of determinants of age difference                                                                                                                           |
| Lung             | References' list | Yamamoto et al., 2003      | Surgical results of stage I non-small cell lung cancer: comparison between elderly and younger patients.                                        | Hospital based study                                                                                                                                                         |
| Colon/Colorectum | Databases        | Folprecht et al., 2004     | Efficacy of 5-fluorouracil-based chemotherapy in elderly patients with metastatic colorectal cancer: A pooled analysis of clinical trials       | Not population-based data - patients data from RCT in several countries                                                                                                      |
| Colon/Colorectum | Databases        | O'Connell et al., 2004     | Do young colon cancer patients have worse outcomes?                                                                                             | Just comparison of 20-40 y age group vs. 60-80 y age group: two extreme groups with probable histopathological difference; no distinction made within the 60-80 y age group. |
| Colon/Colorectum | Databases        | Iversen et al., 2005       | Age and colorectal cancer with focus on the elderly: Trends in relative survival and initial treatment from a Danish Population-Based Study     | No investigation of determinants of age difference in survival                                                                                                               |

| Cancer site               | Origin           | First author, date           | Title                                                                                                                              | Reason for exclusion                                            |
|---------------------------|------------------|------------------------------|------------------------------------------------------------------------------------------------------------------------------------|-----------------------------------------------------------------|
| Both sites                | Databases        | Janssen-Heijnen et al., 2005 | Prognostic impact of increasing age and co-morbidity in cancer patients: a population-based approach                               | No investigation of determinants of age difference in survival  |
| Colon/Colorectum          | Databases        | Milburn Jessup et al., 2005  | Adjuvant chemotherapy for stage III colon cancer: Implications of race/ethnicity, age, and differentiation                         | Not population-based data - a hospital- based database          |
| Colon/Colorectum          | Databases        | Scheiden et al., 2005        | Colon cancer in Luxembourg: A national population-based data report, 1988-1998                                                     | No investigation of determinants of age difference              |
| All cancer sites combined | Databases        | Inghelmann et al., 2005      | National estimates of cancer patients survival in Italy: A model-based method                                                      | No specific data survival for colon or lung cancer              |
| Colon/Colorectum          | References' list | Latkauskas et al., 2005      | The impact of age on post-operative outcomes of colorectal cancer patients undergoing surgical treatment.                          | Hospital based study                                            |
| Colon/Colorectum          | Databases        | Mity et al., 2005            | Improvement in colorectal cancer survival_ A population-based study                                                                | No information about colon cancer alone                         |
| Lung                      | Databases        | Strand et al., 2006          | Survival after resection for primary lung cancer: A population based study of 3211 resected patients                               | No investigation of determinants of age difference              |
| Both sites                | Databases        | Vercelli et al., 2006        | Cancer survival in the elderly: effects of socio-economic factors and health care system features (ELDCARE project)                | No investigation of determinants of age difference              |
| Lung                      | Databases        | Brokx et al., 2007           | Surgical treatment for octogenarians with lung cancer: Results from a population-based series of 124 patients                      | Focused on 80-89 y.o age group with no younger comparison group |
| Lung                      | Databases        | Finlayson et al., 2007       | Outcomes in Octogenarians Undergoing High-Risk Cancer Operation: A National Study                                                  | No investigation of determinants of age difference              |
| Both sites                | Databases        | Gondos et al., 2007          | Cancer survival in Germany and the United States at the beginning of the 21st century: An up-to-date comparison by period analysis | No investigation of determinants of age difference              |
| Colon/Colorectum          | Databases        | Larsen et al., 2007          | Survival after colorectal cancer in patients with Crohn's disease: A nationwide population-based Danish follow-up study            | No investigation of determinants of age difference              |

| Cancer site      | Origin           | First author, date         | Title                                                                                                                                   | Reason for exclusion                                                                              |
|------------------|------------------|----------------------------|-----------------------------------------------------------------------------------------------------------------------------------------|---------------------------------------------------------------------------------------------------|
| Both sites       | References' list | Wedding et al., 2007       | Age, severe comorbidity and functional impairment independently contribute to poor survival in cancer patients.                         | Hospital based study                                                                              |
| Lung             | References' list | Bryant et al., 2008        | Differences in outcomes between younger and older patients with non-small cell lung cancer.                                             | Comparison of <45 year vs. 45+ years; population source not defined                               |
| Both sites       | Databases        | Micheli et al., 2009       | The advantage of women in cancer survival: An analysis of EURO CARE-4 data                                                              | No distinction among 55 y+                                                                        |
| Lung             | Databases        | Koumariou et al., 2009     | Non-small cell lung cancer in the elderly: Clinico-pathologic, management and outcome characteristics in comparison to younger patients | Not population-based study because hospital based registry + No comparison with younger age group |
| Colon/Colorectum | References' list | Zuckerman et al., 2009     | Effect of age on survival benefit of adjuvant chemotherapy in elderly patients with stage III colon cancer.                             | No investigation of determinants of age difference                                                |
| Both sites       | Databases        | Merrill et al., 2010       | Conditional Survival Among Cancer Patients in the United States                                                                         | No investigation of age difference in survival                                                    |
| Lung             | References' list | Davidoff et al., 2010      | Chemotherapy and survival benefit in elderly patients with advanced non-small-cell lung cancer.                                         | No investigation of determinants of age difference                                                |
| Colon/Colorectum | Databases        | Dekker et al., 2011        | Importance of the first postoperative year in the prognosis of elderly colorectal cancer patients                                       | No investigation of determinants of age difference                                                |
| Lung             | Databases        | Baunemann Ott et al., 2011 | Survival and treatment patterns in elderly patients with advanced non-small-cell lung cancer in Manitoba                                | No investigation of determinants of age difference                                                |
| Colon/Colorectum | Databases        | Phipps et al., 2011        | Prediagnostic Smoking History, Alcohol Consumption, and Colorectal Cancer Survival The Seattle Colon Cancer Family Registry             | No distinction within 50+ y age group + no investigation of age difference                        |
| Colon/Colorectum | Databases        | Brenner et al., 2012       | Progress in colorectal cancer survival in Europe from the late 1980s to the early 21st century: The EURO CARE study                     | No investigation of determinants of age difference                                                |



| Cancer site       | Origin    | First author, date           | Title                                                                                                                                                              | Reason for exclusion                                                                                                                  |
|-------------------|-----------|------------------------------|--------------------------------------------------------------------------------------------------------------------------------------------------------------------|---------------------------------------------------------------------------------------------------------------------------------------|
| Lung              | Databases | Cuffe et al., 2012           | Adjuvant chemotherapy for non-small-cell lung cancer in the elderly: A population-based study in Ontario, Canada                                                   | No investigation of determinants of age difference                                                                                    |
| Lung              | Databases | Janssen-Heijnen et al., 2012 | Treatment and survival of patients with small-cell lung cancer: small steps forward, but not for patients > 80                                                     | Not enough information to see if potential effect of extent of disease on age difference                                              |
| Lung              | Databases | Paripati et al., 2012        | Multimodality therapy improves survival in elderly patients with locally advanced non-small cell lung cancer-A retrospective analysis                              | Not population-based study because hospital based registry (Mayo Clinic Arizona)                                                      |
| Other cancer site | Databases | Schildberg et al., 2012      | Differences in the treatment of young gastric cancer patients: Patients under 50 years have better 5-year survival than older patients                             | Not right population (i.e. gastric cancer patients). Not population-based study (inclusion from surgical department of Erlangen Univ) |
| Both sites        | Databases | Syse et al., 2012            | Cancer incidence, prevalence and survival in an aging Norwegian population                                                                                         | No investigation of determinants of age difference                                                                                    |
| Colon/Colorectum  | Databases | Allemani et al., 2013        | Colorectal cancer survival in the USA and Europe: A CONCORD high-resolution study                                                                                  | No investigation of determinants of age difference                                                                                    |
| Colon/Colorectum  | Databases | Mitry et al., 2013           | Improvement in survival of metastatic colorectal cancer: Are the benefits of clinical trials reproduced in population-based studies?                               | No investigation of determinants of age difference                                                                                    |
| Colon/Colorectum  | Databases | van den Broek et al., 2013   | Time trends in chemotherapy (administration and costs) and relative survival in stage III colon cancer patients - a large population-based study from 1990 to 2008 | No investigation of age difference in survival                                                                                        |
| Colon/Colorectum  | Databases | Van Gestel et al., 2013      | Influence of comorbidity and age on 1-, 2-, and 3-month postoperative mortality rates in gastrointestinal cancer patients                                          | No investigation of determinants of age difference                                                                                    |
| Colon/Colorectum  | Databases | Wallace et al., 2013         | Racial disparities in advanced-stage colorectal cancer survival                                                                                                    | No distinction within 50+ y age group                                                                                                 |

| Cancer site      | Origin           | First author, date            | Title                                                                                                                                                                  | Reason for exclusion                                                                         |
|------------------|------------------|-------------------------------|------------------------------------------------------------------------------------------------------------------------------------------------------------------------|----------------------------------------------------------------------------------------------|
| Colon/Colorectum | References' list | Golan et al., 2013            | Changing prognosis of metastatic colorectal adenocarcinoma: differential improvement by age and tumor location.                                                        | No investigation of determinants of age difference                                           |
| Colon/Colorectum | References' list | McCleary et al., 2013         | Impact of age on the efficacy of newer adjuvant therapies in patients with stage II/III colon cancer: findings from the ACCENT database.                               | Data from clinical trials                                                                    |
| Colon/Colorectum | References' list | Sorbye et al., 2013           | Age-dependent improvement in median and long-term survival in unselected population-based Nordic registries of patients with synchronous metastatic colorectal cancer. | No investigation of determinants of age difference                                           |
| Colon/Colorectum | Databases        | Hamaker et al., 2014          | Improved survival for older patients undergoing surgery for colorectal cancer between 2008 and 2011                                                                    | No investigation of determinants of age difference                                           |
| Lung             | Databases        | Huang et al., 2014            | Factors associated with lung cancer patients refusing treatment and their survival: A national cohort study under a universal health insurance in Taiwan               | No investigation of determinants of age difference                                           |
| Colon/Colorectum | Databases        | Li et al., 2014               | Better long-term survival in young patients with non-metastatic colorectal cancer after surgery, an analysis of 69,835 patients in SEER database                       | No distinction within 40+ y age group and no investigation of determinants of age difference |
| Colon/Colorectum | Databases        | McKay et al., 2014            | Does young age influence the prognosis of colorectal cancer: a population-based analysis                                                                               | No investigation of determinants of age difference                                           |
| Colon/Colorectum | Databases        | Ortiz-Ortiz et al., 2014      | Effects of Type of Health Insurance Coverage on Colorectal Cancer Survival in Puerto Rico: A Population-Based Study                                                    | No investigation of age difference in survival                                               |
| Colon/Colorectum | Databases        | Sankaranarayanan et al., 2014 | A registry study of the association of patient's residence and age with colorectal cancer survival                                                                     | No investigation of determinants of age difference                                           |

| Cancer site       | Origin           | First author, date    | Title                                                                                                                                                                 | Reason for exclusion                                           |
|-------------------|------------------|-----------------------|-----------------------------------------------------------------------------------------------------------------------------------------------------------------------|----------------------------------------------------------------|
| Colon/Colorectum  | Databases        | Slavicek et al., 2014 | Efficacy and safety of bevacizumab in elderly patients with metastatic colorectal cancer: Results from the Czech population-based registry                            | No investigation of determinants of age difference             |
| Colon/Colorectum  | References' list | Ahmed et al., 2014    | The influence of age on the outcome of treatment of elderly patients with colorectal cancer.                                                                          | Hospital based study                                           |
| Colon/Colorectum  | References' list | Steele et al., 2014   | The impact of age on colorectal cancer incidence, treatment, and outcomes in an equal-access health care system.                                                      | Study's population is military beneficiaries                   |
| Colon/Colorectum  | Databases        | Booth et al., 2015    | Management and Outcome of Colorectal Cancer Liver Metastases in Elderly Patients: A Population-Based Study                                                            | No investigation of determinants of age difference             |
| Other cancer site | Databases        | Damhuis et al., 2015  | Treatment patterns and survival analysis in 9014 patients with malignant pleural mesothelioma from Belgium, the Netherlands and England                               | Investigate malignant pleural mesothelioma and not lung cancer |
| Colon/Colorectum  | Databases        | Khan et al., 2015     | Surgical management of metastatic colon cancer: A population-based analysis                                                                                           | No investigation of determinants of age difference             |
| Colon/Colorectum  | Databases        | Kotake et al., 2015   | Tumour characteristics, treatment patterns and survival of patients aged                                                                                              | Hospital based study                                           |
| Colon/Colorectum  | Databases        | Li et al., 2015       | The prognosis significance of age in operated and non-operated colorectal cancer.                                                                                     | No information about colon cancer alone                        |
| Colon/Colorectum  | Databases        | Parakh et al., 2015   | Patterns of care and outcomes for elderly patients with metastatic colorectal cancer in Australia                                                                     | Hospital based study                                           |
| Lung              | Databases        | Speicher et al., 2015 | Outcomes after treatment of 17 378 patients with locally advanced (T3N0-2) non-small-cell lung cancer                                                                 | No investigation of determinants of age difference             |
| Colon/Colorectum  | Databases        | Wang et al., 2015     | Clinicopathological Features and Survival Outcomes of Colorectal Cancer in Young Versus Elderly A Population-Based Cohort Study of SEER 9 Registries Data (1988-2011) | No distinction within 50+ y age group                          |

| Cancer site      | Origin           | First author, date            | Title                                                                                                                                                                    | Reason for exclusion                               |
|------------------|------------------|-------------------------------|--------------------------------------------------------------------------------------------------------------------------------------------------------------------------|----------------------------------------------------|
| Colon/Colorectum | Databases        | Zhang et al., 2015            | Effects of Health Insurance on Tumor Stage, Treatment, and Survival in Large Cohorts of Patients with Breast and Colorectal Cancer                                       | No investigation of determinants of age difference |
| Lung             | References' list | Hsu et al., 2015              | Advanced non-small cell lung cancer in the elderly: the impact of age and comorbidities on treatment modalities and patient prognosis                                    | Hospital based study                               |
| Lung             | References' list | Hansen et al., 2015           | Age dependent prognosis in concurrent chemo-radiation of locally advanced NSCLC.                                                                                         | Hospital based study                               |
| Colon/Colorectum | Databases        | Jiang et al., 2016            | Effect of age on survival outcome in operated and non-operated patients with colon cancer: A population-based study                                                      | No distinction within 40+ y age group              |
| Colon/Colorectum | Databases        | Maffei et al., 2016           | Clinical features of colorectal cancer patients in advanced age: a population-based approach                                                                             | No investigation of determinants of age difference |
| Colon/Colorectum | Databases        | Yeo et al., 2016              | Surgical oncology outcomes in the aging US population                                                                                                                    | Hospital based study                               |
| Colon/Colorectum | Databases        | Chou et al., 2017             | The impact of young age on the prognosis for colorectal cancer: A population-based study in Taiwan                                                                       | No information about colon cancer alone            |
| Colon/Colorectum | Databases        | Flemming et al., 2017         | Association between the time to surgery and survival among patients with colon cancer: A population-based study                                                          | No investigation of determinants of age difference |
| Colon/Colorectum | Databases        | Schlesinger-Raab et al., 2017 | Age and Outcome in Gastrointestinal Cancers_ A Population-Based Evaluation of Oesophageal, Gastric and Colorectal Cancer                                                 | No information about colon cancer alone            |
| Colon/Colorectum | Databases        | Wan Kim et al., 2017          | The impact of delayed commencement of adjuvant chemotherapy (eight or more weeks) on survival in stage II and III colon cancer: a national population-based cohort study | No investigation of determinants of age difference |

| Cancer site      | Origin    | First author, date    | Title                                                                                                                                                                | Reason for exclusion                                                       |
|------------------|-----------|-----------------------|----------------------------------------------------------------------------------------------------------------------------------------------------------------------|----------------------------------------------------------------------------|
| Both sites       | Databases | Kwak et al., 2017     | Disparities by Age, Sex, Tumor Stage, Diagnosis Path, and Area-level Socioeconomic Status in Survival Time for Major Cancers: Results from the Busan Cancer Registry | No investigation of determinants of age difference                         |
| Colon/Colorectum | Databases | Merchant et al., 2017 | Management of stage III colon cancer in the elderly: Practice patterns and outcomes in the general population                                                        | No investigation of age difference in survival                             |
| Colon/Colorectum | Databases | Wallace et al., 2017  | Racial Differences in Stage IV Colorectal Cancer Survival in Younger and Older Patients                                                                              | No distinction within 50+ y age group                                      |
| Colon/Colorectum | Databases | Wu et al., 2017       | Survival outcomes and surgical intervention of small intestinal neuroendocrine tumors: A population based retrospective study                                        | No distinction within 50+ y age group + no investigation of age difference |
| Colon/Colorectum | Databases | Zhuang et al., 2017   | Age-related disparity in patients with colorectal cancer: A population-based study from SEER program                                                                 | No investigation of determinants of age difference                         |
| Both sites       | Databases | Chen et al., 2017     | Cancer survival in Qidong between 1972 and 2011: A population-based analysis                                                                                         | No investigation of determinants of age difference                         |
| Colon/Colorectum | Databases | Babaei et al., 2018   | Administration of adjuvant chemotherapy for stage II-III colon cancer patients: An European population-based study                                                   | No investigation of determinants of age difference                         |
| Colon/Colorectum | Databases | Breugom et al., 2018  | Decrease in 30-day and one-year mortality over time in patients aged $\geq 75$ years with stage I-III colon cancer: A population-based study                         | No investigation of determinants of age difference                         |
| Lung             | Databases | Dalwadi et al., 2018  | Practice Patterns and Outcomes in Elderly Stage I Non-Small-cell Lung Cancer: A 2004 to 2012 SEER Analysis                                                           | No investigation of determinants of age difference                         |
| Lung             | Databases | Damhuis et al., 2018  | Usage of Prophylactic Cranial Irradiation in Elderly Patients With Small-cell Lung Cancer                                                                            | No investigation of determinants of age difference                         |

| Cancer site      | Origin            | First author, date      | Title                                                                                                                                  | Reason for exclusion                               |
|------------------|-------------------|-------------------------|----------------------------------------------------------------------------------------------------------------------------------------|----------------------------------------------------|
| Lung             | Databases         | Damhuis et al., 2018    | Population-based Results of Chemoradiotherapy for Limited Stage Small Cell Lung Cancer in The Netherlands                              | No investigation of determinants of age difference |
| Both sites       | Databases         | Li et al., 2018         | Has cancer survival improved for older people as for younger people? New South Wales, 1980-2012                                        | No investigation of determinants of age difference |
| Colon/Colorectum | Databases         | Brouwer et al., 2019    | The gap in postoperative outcome between older and younger patients with stage I-III colorectal cancer has been bridged                | No investigation of determinants of age difference |
| Lung             | Databases         | Gedvilaite et al., 2019 | Lung Cancer Survival in Lithuania: Changes by Histology, Age, and Sex From 2003-2007 to 2008-2012                                      | No investigation of determinants of age difference |
| Both sites       | Databases         | Jang et al., 2019       | Socioeconomic status and survival outcomes in elderly cancer patients: A national health insurance service-elderly sample cohort study | All cancers combined                               |
| Colon/Colorectum | Databases         | Van Abbema et al., 2019 | Trends in overall survival and treatment patterns in two large population-based cohorts of patients with breast and colorectal cancer  | No investigation of determinants of age difference |
| Colon/Colorectum | Databases' search | Bos et al., 2019        | Postoperative mortality in elderly patients with colorectal cancer: The impact of age, time-trends and competing risks of dying        | No investigation of determinants of age difference |
| Colon/Colorectum | Databases         | Feng et al., 2019       | Increasing age-related survival gap among patients with colorectal cancer_ a population-based retrospective study                      | No information about colon cancer alone            |
| Colon/Colorectum | Databases         | Joachim et al., 2019    | Overall survival of colorectal cancer by stage at diagnosis Data from the Martinique Cancer Registry                                   | No information about colon cancer alone            |

| Cancer site      | Origin    | First author, date       | Title                                                                                                                                                                    | Reason for exclusion                    |
|------------------|-----------|--------------------------|--------------------------------------------------------------------------------------------------------------------------------------------------------------------------|-----------------------------------------|
| Colon/Colorectum | Databases | Vallance et al.,<br>2019 | The impact of advancing age on incidence of hepatectomy and post-operative outcomes in patients with colorectal cancer liver metastases: a population-based cohort study | No information about colon cancer alone |





| First author, date           | Results                                                                                                                                                                                                                                                                                                                                                                                                                                                                                                                                                                                                                                                                                                                                                                                                                                                                                                                                                                                                                                                                                                                                                                                                                                                                                                                                                                                                                                                                                                                                                                                                                                                                                                                                                     |              |               |              |               |             |                |         |         |         |         |           |            |            |             |             |           |            |            |            |             |       |            |            |            |             |       |            |              |              |   |                 |  |  |  |  |       |            |            |            |             |       |            |            |            |            |       |            |            |            |            |       |            |            |             |              |                  |  |  |  |  |       |            |            |            |            |       |            |            |            |             |       |            |            |            |             |       |            |            |             |   |
|------------------------------|-------------------------------------------------------------------------------------------------------------------------------------------------------------------------------------------------------------------------------------------------------------------------------------------------------------------------------------------------------------------------------------------------------------------------------------------------------------------------------------------------------------------------------------------------------------------------------------------------------------------------------------------------------------------------------------------------------------------------------------------------------------------------------------------------------------------------------------------------------------------------------------------------------------------------------------------------------------------------------------------------------------------------------------------------------------------------------------------------------------------------------------------------------------------------------------------------------------------------------------------------------------------------------------------------------------------------------------------------------------------------------------------------------------------------------------------------------------------------------------------------------------------------------------------------------------------------------------------------------------------------------------------------------------------------------------------------------------------------------------------------------------|--------------|---------------|--------------|---------------|-------------|----------------|---------|---------|---------|---------|-----------|------------|------------|-------------|-------------|-----------|------------|------------|------------|-------------|-------|------------|------------|------------|-------------|-------|------------|--------------|--------------|---|-----------------|--|--|--|--|-------|------------|------------|------------|-------------|-------|------------|------------|------------|------------|-------|------------|------------|------------|------------|-------|------------|------------|-------------|--------------|------------------|--|--|--|--|-------|------------|------------|------------|------------|-------|------------|------------|------------|-------------|-------|------------|------------|------------|-------------|-------|------------|------------|-------------|---|
| Nedrebø et al., 2011         | <p><b>5-year relative survival (%)</b></p> <hr/> <table border="1"> <thead> <tr> <th></th> <th colspan="2">Node-negative</th> <th colspan="2">Node-positive</th> </tr> <tr> <th></th> <th>1994-96</th> <th>2001-03</th> <th>1994-96</th> <th>2001-03</th> </tr> </thead> <tbody> <tr> <td>≤75 years</td> <td>85.4</td> <td>88.5</td> <td>51.5</td> <td>67.1</td> </tr> <tr> <td>&gt;75 years</td> <td>81.6</td> <td>84.7</td> <td>48.7</td> <td>51.6</td> </tr> </tbody> </table> <hr/>                                                                                                                                                                                                                                                                                                                                                                                                                                                                                                                                                                                                                                                                                                                                                                                                                                                                                                                                                                                                                                                                                                                                                                                                                                                                     |              | Node-negative |              | Node-positive |             |                | 1994-96 | 2001-03 | 1994-96 | 2001-03 | ≤75 years | 85.4       | 88.5       | 51.5        | 67.1        | >75 years | 81.6       | 84.7       | 48.7       | 51.6        |       |            |            |            |             |       |            |              |              |   |                 |  |  |  |  |       |            |            |            |             |       |            |            |            |            |       |            |            |            |            |       |            |            |             |              |                  |  |  |  |  |       |            |            |            |            |       |            |            |            |             |       |            |            |            |             |       |            |            |             |   |
|                              | Node-negative                                                                                                                                                                                                                                                                                                                                                                                                                                                                                                                                                                                                                                                                                                                                                                                                                                                                                                                                                                                                                                                                                                                                                                                                                                                                                                                                                                                                                                                                                                                                                                                                                                                                                                                                               |              | Node-positive |              |               |             |                |         |         |         |         |           |            |            |             |             |           |            |            |            |             |       |            |            |            |             |       |            |              |              |   |                 |  |  |  |  |       |            |            |            |             |       |            |            |            |            |       |            |            |            |            |       |            |            |             |              |                  |  |  |  |  |       |            |            |            |            |       |            |            |            |             |       |            |            |            |             |       |            |            |             |   |
|                              | 1994-96                                                                                                                                                                                                                                                                                                                                                                                                                                                                                                                                                                                                                                                                                                                                                                                                                                                                                                                                                                                                                                                                                                                                                                                                                                                                                                                                                                                                                                                                                                                                                                                                                                                                                                                                                     | 2001-03      | 1994-96       | 2001-03      |               |             |                |         |         |         |         |           |            |            |             |             |           |            |            |            |             |       |            |            |            |             |       |            |              |              |   |                 |  |  |  |  |       |            |            |            |             |       |            |            |            |            |       |            |            |            |            |       |            |            |             |              |                  |  |  |  |  |       |            |            |            |            |       |            |            |            |             |       |            |            |            |             |       |            |            |             |   |
| ≤75 years                    | 85.4                                                                                                                                                                                                                                                                                                                                                                                                                                                                                                                                                                                                                                                                                                                                                                                                                                                                                                                                                                                                                                                                                                                                                                                                                                                                                                                                                                                                                                                                                                                                                                                                                                                                                                                                                        | 88.5         | 51.5          | 67.1         |               |             |                |         |         |         |         |           |            |            |             |             |           |            |            |            |             |       |            |            |            |             |       |            |              |              |   |                 |  |  |  |  |       |            |            |            |             |       |            |            |            |            |       |            |            |            |            |       |            |            |             |              |                  |  |  |  |  |       |            |            |            |            |       |            |            |            |             |       |            |            |            |             |       |            |            |             |   |
| >75 years                    | 81.6                                                                                                                                                                                                                                                                                                                                                                                                                                                                                                                                                                                                                                                                                                                                                                                                                                                                                                                                                                                                                                                                                                                                                                                                                                                                                                                                                                                                                                                                                                                                                                                                                                                                                                                                                        | 84.7         | 48.7          | 51.6         |               |             |                |         |         |         |         |           |            |            |             |             |           |            |            |            |             |       |            |            |            |             |       |            |              |              |   |                 |  |  |  |  |       |            |            |            |             |       |            |            |            |            |       |            |            |            |            |       |            |            |             |              |                  |  |  |  |  |       |            |            |            |            |       |            |            |            |             |       |            |            |            |             |       |            |            |             |   |
| Van Steenbergen et al., 2013 | <p><b>5-year relative survival conditioning on surviving 0,3,5,10 years after cancer diagnosis</b></p> <hr/> <table border="1"> <thead> <tr> <th></th> <th>At 0 years</th> <th>At 3 years</th> <th>At 5 years</th> <th>At 10 years</th> </tr> </thead> <tbody> <tr> <td colspan="5"><b>Stage I</b></td> </tr> <tr> <td>15-44</td> <td>93 (90-96)</td> <td>97 (95-99)</td> <td>99 (97-100)</td> <td>99 (98-101)</td> </tr> <tr> <td>45-59</td> <td>94 (93-96)</td> <td>95 (94-97)</td> <td>96 (94-97)</td> <td>97 (95-100)</td> </tr> <tr> <td>60-74</td> <td>91 (89-92)</td> <td>94 (92-95)</td> <td>96 (95-98)</td> <td>98 (95-100)</td> </tr> <tr> <td>75-89</td> <td>92 (90-94)</td> <td>100 (96-103)</td> <td>103 (98-107)</td> <td>-</td> </tr> <tr> <td colspan="5"><b>Stage II</b></td> </tr> <tr> <td>15-44</td> <td>90 (88-92)</td> <td>94 (93-96)</td> <td>96 (95-98)</td> <td>98 (97-100)</td> </tr> <tr> <td>45-59</td> <td>81 (80-83)</td> <td>88 (87-90)</td> <td>92 (91-94)</td> <td>96 (94-98)</td> </tr> <tr> <td>60-74</td> <td>77 (76-78)</td> <td>88 (87-89)</td> <td>92 (91-94)</td> <td>97 (94-99)</td> </tr> <tr> <td>75-89</td> <td>76 (75-77)</td> <td>95 (93-97)</td> <td>99 (96-102)</td> <td>103 (94-112)</td> </tr> <tr> <td colspan="5"><b>Stage III</b></td> </tr> <tr> <td>15-44</td> <td>68 (64-71)</td> <td>82 (79-86)</td> <td>91 (88-94)</td> <td>92 (88-97)</td> </tr> <tr> <td>45-59</td> <td>63 (62-65)</td> <td>77 (75-79)</td> <td>88 (86-90)</td> <td>98 (95-100)</td> </tr> <tr> <td>60-74</td> <td>57 (56-58)</td> <td>78 (76-79)</td> <td>90 (88-92)</td> <td>98 (94-101)</td> </tr> <tr> <td>75-89</td> <td>49 (47-51)</td> <td>84 (80-87)</td> <td>97 (92-102)</td> <td>-</td> </tr> </tbody> </table> <hr/> |              | At 0 years    | At 3 years   | At 5 years    | At 10 years | <b>Stage I</b> |         |         |         |         | 15-44     | 93 (90-96) | 97 (95-99) | 99 (97-100) | 99 (98-101) | 45-59     | 94 (93-96) | 95 (94-97) | 96 (94-97) | 97 (95-100) | 60-74 | 91 (89-92) | 94 (92-95) | 96 (95-98) | 98 (95-100) | 75-89 | 92 (90-94) | 100 (96-103) | 103 (98-107) | - | <b>Stage II</b> |  |  |  |  | 15-44 | 90 (88-92) | 94 (93-96) | 96 (95-98) | 98 (97-100) | 45-59 | 81 (80-83) | 88 (87-90) | 92 (91-94) | 96 (94-98) | 60-74 | 77 (76-78) | 88 (87-89) | 92 (91-94) | 97 (94-99) | 75-89 | 76 (75-77) | 95 (93-97) | 99 (96-102) | 103 (94-112) | <b>Stage III</b> |  |  |  |  | 15-44 | 68 (64-71) | 82 (79-86) | 91 (88-94) | 92 (88-97) | 45-59 | 63 (62-65) | 77 (75-79) | 88 (86-90) | 98 (95-100) | 60-74 | 57 (56-58) | 78 (76-79) | 90 (88-92) | 98 (94-101) | 75-89 | 49 (47-51) | 84 (80-87) | 97 (92-102) | - |
|                              | At 0 years                                                                                                                                                                                                                                                                                                                                                                                                                                                                                                                                                                                                                                                                                                                                                                                                                                                                                                                                                                                                                                                                                                                                                                                                                                                                                                                                                                                                                                                                                                                                                                                                                                                                                                                                                  | At 3 years   | At 5 years    | At 10 years  |               |             |                |         |         |         |         |           |            |            |             |             |           |            |            |            |             |       |            |            |            |             |       |            |              |              |   |                 |  |  |  |  |       |            |            |            |             |       |            |            |            |            |       |            |            |            |            |       |            |            |             |              |                  |  |  |  |  |       |            |            |            |            |       |            |            |            |             |       |            |            |            |             |       |            |            |             |   |
| <b>Stage I</b>               |                                                                                                                                                                                                                                                                                                                                                                                                                                                                                                                                                                                                                                                                                                                                                                                                                                                                                                                                                                                                                                                                                                                                                                                                                                                                                                                                                                                                                                                                                                                                                                                                                                                                                                                                                             |              |               |              |               |             |                |         |         |         |         |           |            |            |             |             |           |            |            |            |             |       |            |            |            |             |       |            |              |              |   |                 |  |  |  |  |       |            |            |            |             |       |            |            |            |            |       |            |            |            |            |       |            |            |             |              |                  |  |  |  |  |       |            |            |            |            |       |            |            |            |             |       |            |            |            |             |       |            |            |             |   |
| 15-44                        | 93 (90-96)                                                                                                                                                                                                                                                                                                                                                                                                                                                                                                                                                                                                                                                                                                                                                                                                                                                                                                                                                                                                                                                                                                                                                                                                                                                                                                                                                                                                                                                                                                                                                                                                                                                                                                                                                  | 97 (95-99)   | 99 (97-100)   | 99 (98-101)  |               |             |                |         |         |         |         |           |            |            |             |             |           |            |            |            |             |       |            |            |            |             |       |            |              |              |   |                 |  |  |  |  |       |            |            |            |             |       |            |            |            |            |       |            |            |            |            |       |            |            |             |              |                  |  |  |  |  |       |            |            |            |            |       |            |            |            |             |       |            |            |            |             |       |            |            |             |   |
| 45-59                        | 94 (93-96)                                                                                                                                                                                                                                                                                                                                                                                                                                                                                                                                                                                                                                                                                                                                                                                                                                                                                                                                                                                                                                                                                                                                                                                                                                                                                                                                                                                                                                                                                                                                                                                                                                                                                                                                                  | 95 (94-97)   | 96 (94-97)    | 97 (95-100)  |               |             |                |         |         |         |         |           |            |            |             |             |           |            |            |            |             |       |            |            |            |             |       |            |              |              |   |                 |  |  |  |  |       |            |            |            |             |       |            |            |            |            |       |            |            |            |            |       |            |            |             |              |                  |  |  |  |  |       |            |            |            |            |       |            |            |            |             |       |            |            |            |             |       |            |            |             |   |
| 60-74                        | 91 (89-92)                                                                                                                                                                                                                                                                                                                                                                                                                                                                                                                                                                                                                                                                                                                                                                                                                                                                                                                                                                                                                                                                                                                                                                                                                                                                                                                                                                                                                                                                                                                                                                                                                                                                                                                                                  | 94 (92-95)   | 96 (95-98)    | 98 (95-100)  |               |             |                |         |         |         |         |           |            |            |             |             |           |            |            |            |             |       |            |            |            |             |       |            |              |              |   |                 |  |  |  |  |       |            |            |            |             |       |            |            |            |            |       |            |            |            |            |       |            |            |             |              |                  |  |  |  |  |       |            |            |            |            |       |            |            |            |             |       |            |            |            |             |       |            |            |             |   |
| 75-89                        | 92 (90-94)                                                                                                                                                                                                                                                                                                                                                                                                                                                                                                                                                                                                                                                                                                                                                                                                                                                                                                                                                                                                                                                                                                                                                                                                                                                                                                                                                                                                                                                                                                                                                                                                                                                                                                                                                  | 100 (96-103) | 103 (98-107)  | -            |               |             |                |         |         |         |         |           |            |            |             |             |           |            |            |            |             |       |            |            |            |             |       |            |              |              |   |                 |  |  |  |  |       |            |            |            |             |       |            |            |            |            |       |            |            |            |            |       |            |            |             |              |                  |  |  |  |  |       |            |            |            |            |       |            |            |            |             |       |            |            |            |             |       |            |            |             |   |
| <b>Stage II</b>              |                                                                                                                                                                                                                                                                                                                                                                                                                                                                                                                                                                                                                                                                                                                                                                                                                                                                                                                                                                                                                                                                                                                                                                                                                                                                                                                                                                                                                                                                                                                                                                                                                                                                                                                                                             |              |               |              |               |             |                |         |         |         |         |           |            |            |             |             |           |            |            |            |             |       |            |            |            |             |       |            |              |              |   |                 |  |  |  |  |       |            |            |            |             |       |            |            |            |            |       |            |            |            |            |       |            |            |             |              |                  |  |  |  |  |       |            |            |            |            |       |            |            |            |             |       |            |            |            |             |       |            |            |             |   |
| 15-44                        | 90 (88-92)                                                                                                                                                                                                                                                                                                                                                                                                                                                                                                                                                                                                                                                                                                                                                                                                                                                                                                                                                                                                                                                                                                                                                                                                                                                                                                                                                                                                                                                                                                                                                                                                                                                                                                                                                  | 94 (93-96)   | 96 (95-98)    | 98 (97-100)  |               |             |                |         |         |         |         |           |            |            |             |             |           |            |            |            |             |       |            |            |            |             |       |            |              |              |   |                 |  |  |  |  |       |            |            |            |             |       |            |            |            |            |       |            |            |            |            |       |            |            |             |              |                  |  |  |  |  |       |            |            |            |            |       |            |            |            |             |       |            |            |            |             |       |            |            |             |   |
| 45-59                        | 81 (80-83)                                                                                                                                                                                                                                                                                                                                                                                                                                                                                                                                                                                                                                                                                                                                                                                                                                                                                                                                                                                                                                                                                                                                                                                                                                                                                                                                                                                                                                                                                                                                                                                                                                                                                                                                                  | 88 (87-90)   | 92 (91-94)    | 96 (94-98)   |               |             |                |         |         |         |         |           |            |            |             |             |           |            |            |            |             |       |            |            |            |             |       |            |              |              |   |                 |  |  |  |  |       |            |            |            |             |       |            |            |            |            |       |            |            |            |            |       |            |            |             |              |                  |  |  |  |  |       |            |            |            |            |       |            |            |            |             |       |            |            |            |             |       |            |            |             |   |
| 60-74                        | 77 (76-78)                                                                                                                                                                                                                                                                                                                                                                                                                                                                                                                                                                                                                                                                                                                                                                                                                                                                                                                                                                                                                                                                                                                                                                                                                                                                                                                                                                                                                                                                                                                                                                                                                                                                                                                                                  | 88 (87-89)   | 92 (91-94)    | 97 (94-99)   |               |             |                |         |         |         |         |           |            |            |             |             |           |            |            |            |             |       |            |            |            |             |       |            |              |              |   |                 |  |  |  |  |       |            |            |            |             |       |            |            |            |            |       |            |            |            |            |       |            |            |             |              |                  |  |  |  |  |       |            |            |            |            |       |            |            |            |             |       |            |            |            |             |       |            |            |             |   |
| 75-89                        | 76 (75-77)                                                                                                                                                                                                                                                                                                                                                                                                                                                                                                                                                                                                                                                                                                                                                                                                                                                                                                                                                                                                                                                                                                                                                                                                                                                                                                                                                                                                                                                                                                                                                                                                                                                                                                                                                  | 95 (93-97)   | 99 (96-102)   | 103 (94-112) |               |             |                |         |         |         |         |           |            |            |             |             |           |            |            |            |             |       |            |            |            |             |       |            |              |              |   |                 |  |  |  |  |       |            |            |            |             |       |            |            |            |            |       |            |            |            |            |       |            |            |             |              |                  |  |  |  |  |       |            |            |            |            |       |            |            |            |             |       |            |            |            |             |       |            |            |             |   |
| <b>Stage III</b>             |                                                                                                                                                                                                                                                                                                                                                                                                                                                                                                                                                                                                                                                                                                                                                                                                                                                                                                                                                                                                                                                                                                                                                                                                                                                                                                                                                                                                                                                                                                                                                                                                                                                                                                                                                             |              |               |              |               |             |                |         |         |         |         |           |            |            |             |             |           |            |            |            |             |       |            |            |            |             |       |            |              |              |   |                 |  |  |  |  |       |            |            |            |             |       |            |            |            |            |       |            |            |            |            |       |            |            |             |              |                  |  |  |  |  |       |            |            |            |            |       |            |            |            |             |       |            |            |            |             |       |            |            |             |   |
| 15-44                        | 68 (64-71)                                                                                                                                                                                                                                                                                                                                                                                                                                                                                                                                                                                                                                                                                                                                                                                                                                                                                                                                                                                                                                                                                                                                                                                                                                                                                                                                                                                                                                                                                                                                                                                                                                                                                                                                                  | 82 (79-86)   | 91 (88-94)    | 92 (88-97)   |               |             |                |         |         |         |         |           |            |            |             |             |           |            |            |            |             |       |            |            |            |             |       |            |              |              |   |                 |  |  |  |  |       |            |            |            |             |       |            |            |            |            |       |            |            |            |            |       |            |            |             |              |                  |  |  |  |  |       |            |            |            |            |       |            |            |            |             |       |            |            |            |             |       |            |            |             |   |
| 45-59                        | 63 (62-65)                                                                                                                                                                                                                                                                                                                                                                                                                                                                                                                                                                                                                                                                                                                                                                                                                                                                                                                                                                                                                                                                                                                                                                                                                                                                                                                                                                                                                                                                                                                                                                                                                                                                                                                                                  | 77 (75-79)   | 88 (86-90)    | 98 (95-100)  |               |             |                |         |         |         |         |           |            |            |             |             |           |            |            |            |             |       |            |            |            |             |       |            |              |              |   |                 |  |  |  |  |       |            |            |            |             |       |            |            |            |            |       |            |            |            |            |       |            |            |             |              |                  |  |  |  |  |       |            |            |            |            |       |            |            |            |             |       |            |            |            |             |       |            |            |             |   |
| 60-74                        | 57 (56-58)                                                                                                                                                                                                                                                                                                                                                                                                                                                                                                                                                                                                                                                                                                                                                                                                                                                                                                                                                                                                                                                                                                                                                                                                                                                                                                                                                                                                                                                                                                                                                                                                                                                                                                                                                  | 78 (76-79)   | 90 (88-92)    | 98 (94-101)  |               |             |                |         |         |         |         |           |            |            |             |             |           |            |            |            |             |       |            |            |            |             |       |            |              |              |   |                 |  |  |  |  |       |            |            |            |             |       |            |            |            |            |       |            |            |            |            |       |            |            |             |              |                  |  |  |  |  |       |            |            |            |            |       |            |            |            |             |       |            |            |            |             |       |            |            |             |   |
| 75-89                        | 49 (47-51)                                                                                                                                                                                                                                                                                                                                                                                                                                                                                                                                                                                                                                                                                                                                                                                                                                                                                                                                                                                                                                                                                                                                                                                                                                                                                                                                                                                                                                                                                                                                                                                                                                                                                                                                                  | 84 (80-87)   | 97 (92-102)   | -            |               |             |                |         |         |         |         |           |            |            |             |             |           |            |            |            |             |       |            |            |            |             |       |            |              |              |   |                 |  |  |  |  |       |            |            |            |             |       |            |            |            |            |       |            |            |            |            |       |            |            |             |              |                  |  |  |  |  |       |            |            |            |            |       |            |            |            |             |       |            |            |            |             |       |            |            |             |   |

| First author, date         | Results                                             |            |            |
|----------------------------|-----------------------------------------------------|------------|------------|
| Khan et al., 2014          | <b>Cumulative incidence of death at 5 years (%)</b> |            |            |
|                            | -----<br>Number of lymph nodes<br>-----             |            |            |
|                            | 0-11                                                | ≥12        |            |
|                            | -----<br>Age (years)<br>-----                       |            |            |
|                            | 20-49                                               | 19.8       | 17.2       |
|                            | 50-64                                               | 18.4       | 16.7       |
|                            | 65-74                                               | 21.1       | 18.3       |
|                            | 75-84                                               | 24.6       | 18.7       |
|                            | ≥ 85                                                | 27.5       | 17.8       |
|                            | -----                                               |            |            |
| Mariotto et al, 2014       | <b>5-year relative survival (% - 95%CI)</b>         |            |            |
|                            | -----<br>Males      Females<br>-----                |            |            |
|                            | 20-44                                               | 64 (62-66) | 64 (62-66) |
|                            | 45-54                                               | 68 (66-69) | 68 (67-70) |
|                            | 55-64                                               | 66 (65-67) | 67 (66-68) |
|                            | 65-74                                               | 68 (66-69) | 68 (67-69) |
|                            | 75+                                                 | 60 (58-61) | 59 (58-60) |
|                            | -----                                               |            |            |
| Aan De Stegge et al., 2016 | <b>5-year overall survival (%)</b>                  |            |            |
|                            | -----<br>Number of lymph nodes<br>-----             |            |            |
|                            | 0-11                                                | ≥12        |            |
|                            | -----<br>Age (years)<br>-----                       |            |            |
|                            | <66                                                 | 79         | 81         |
|                            | 66-75                                               | 66         | 71         |
|                            | >75                                                 | 45         | 53         |
|                            | -----                                               |            |            |

| First author, date  | Results                                                                                                                                                                                                                                                                                                                                                                                                                                                                                                                                                                                                                                                                                                                                                                                                                                                                                                                                                                                                                                                                                                                                                                                                                                                                                                                                                                                                                                                                                                                                                                                                                |                     |               |             |             |       |             |       |                  |                   |       |                  |                   |       |                    |                     |     |      |      |       |      |       |      |      |     |      |      |            |       |      |      |      |       |  |      |      |       |  |      |      |       |  |      |      |     |  |      |      |
|---------------------|------------------------------------------------------------------------------------------------------------------------------------------------------------------------------------------------------------------------------------------------------------------------------------------------------------------------------------------------------------------------------------------------------------------------------------------------------------------------------------------------------------------------------------------------------------------------------------------------------------------------------------------------------------------------------------------------------------------------------------------------------------------------------------------------------------------------------------------------------------------------------------------------------------------------------------------------------------------------------------------------------------------------------------------------------------------------------------------------------------------------------------------------------------------------------------------------------------------------------------------------------------------------------------------------------------------------------------------------------------------------------------------------------------------------------------------------------------------------------------------------------------------------------------------------------------------------------------------------------------------------|---------------------|---------------|-------------|-------------|-------|-------------|-------|------------------|-------------------|-------|------------------|-------------------|-------|--------------------|---------------------|-----|------|------|-------|------|-------|------|------|-----|------|------|------------|-------|------|------|------|-------|--|------|------|-------|--|------|------|-------|--|------|------|-----|--|------|------|
| Hines et al., 2016  | <p><b>5-year mortality rate</b> (per 1,000 person.year; 95% CI) adjusted for tumor site, categorical age at diagnosis, race/ethnicity, gender, CT poverty, CT geography (rural, suburban, urban), and tumor grade:</p> <hr/> <p style="text-align: center;">Chemotherapy Status</p> <hr/> <table style="width: 100%; border-collapse: collapse;"> <thead> <tr> <th style="width: 15%;"></th> <th style="width: 35%; text-align: center;">Yes</th> <th style="width: 35%; text-align: center;">No</th> </tr> </thead> <tbody> <tr> <td>Age (years)</td> <td></td> <td></td> </tr> <tr> <td>40–64</td> <td style="text-align: center;">49.7 (33.9–73.1)</td> <td style="text-align: center;">68.8 (45.7–103.6)</td> </tr> <tr> <td>65–74</td> <td style="text-align: center;">54.6 (33.3–89.5)</td> <td style="text-align: center;">91.8 (55.4–152.2)</td> </tr> <tr> <td>75–84</td> <td style="text-align: center;">138.7 (85.2–225.9)</td> <td style="text-align: center;">193.1 (120.0–310.5)</td> </tr> </tbody> </table> <hr/>                                                                                                                                                                                                                                                                                                                                                                                                                                                                                                                                                                                      |                     | Yes           | No          | Age (years) |       |             | 40–64 | 49.7 (33.9–73.1) | 68.8 (45.7–103.6) | 65–74 | 54.6 (33.3–89.5) | 91.8 (55.4–152.2) | 75–84 | 138.7 (85.2–225.9) | 193.1 (120.0–310.5) |     |      |      |       |      |       |      |      |     |      |      |            |       |      |      |      |       |  |      |      |       |  |      |      |       |  |      |      |     |  |      |      |
|                     | Yes                                                                                                                                                                                                                                                                                                                                                                                                                                                                                                                                                                                                                                                                                                                                                                                                                                                                                                                                                                                                                                                                                                                                                                                                                                                                                                                                                                                                                                                                                                                                                                                                                    | No                  |               |             |             |       |             |       |                  |                   |       |                  |                   |       |                    |                     |     |      |      |       |      |       |      |      |     |      |      |            |       |      |      |      |       |  |      |      |       |  |      |      |       |  |      |      |     |  |      |      |
| Age (years)         |                                                                                                                                                                                                                                                                                                                                                                                                                                                                                                                                                                                                                                                                                                                                                                                                                                                                                                                                                                                                                                                                                                                                                                                                                                                                                                                                                                                                                                                                                                                                                                                                                        |                     |               |             |             |       |             |       |                  |                   |       |                  |                   |       |                    |                     |     |      |      |       |      |       |      |      |     |      |      |            |       |      |      |      |       |  |      |      |       |  |      |      |       |  |      |      |     |  |      |      |
| 40–64               | 49.7 (33.9–73.1)                                                                                                                                                                                                                                                                                                                                                                                                                                                                                                                                                                                                                                                                                                                                                                                                                                                                                                                                                                                                                                                                                                                                                                                                                                                                                                                                                                                                                                                                                                                                                                                                       | 68.8 (45.7–103.6)   |               |             |             |       |             |       |                  |                   |       |                  |                   |       |                    |                     |     |      |      |       |      |       |      |      |     |      |      |            |       |      |      |      |       |  |      |      |       |  |      |      |       |  |      |      |     |  |      |      |
| 65–74               | 54.6 (33.3–89.5)                                                                                                                                                                                                                                                                                                                                                                                                                                                                                                                                                                                                                                                                                                                                                                                                                                                                                                                                                                                                                                                                                                                                                                                                                                                                                                                                                                                                                                                                                                                                                                                                       | 91.8 (55.4–152.2)   |               |             |             |       |             |       |                  |                   |       |                  |                   |       |                    |                     |     |      |      |       |      |       |      |      |     |      |      |            |       |      |      |      |       |  |      |      |       |  |      |      |       |  |      |      |     |  |      |      |
| 75–84               | 138.7 (85.2–225.9)                                                                                                                                                                                                                                                                                                                                                                                                                                                                                                                                                                                                                                                                                                                                                                                                                                                                                                                                                                                                                                                                                                                                                                                                                                                                                                                                                                                                                                                                                                                                                                                                     | 193.1 (120.0–310.5) |               |             |             |       |             |       |                  |                   |       |                  |                   |       |                    |                     |     |      |      |       |      |       |      |      |     |      |      |            |       |      |      |      |       |  |      |      |       |  |      |      |       |  |      |      |     |  |      |      |
| Aquina et al., 2017 | <table style="width: 100%; border-collapse: collapse;"> <thead> <tr> <th style="width: 30%;"></th> <th colspan="2" style="width: 35%; text-align: center;">Complications</th> <th colspan="2" style="width: 35%; text-align: center;">Sepsis</th> </tr> <tr> <td></td> <td style="text-align: center;">No</td> <td style="text-align: center;">Yes</td> <td style="text-align: center;">No</td> <td style="text-align: center;">Yes</td> </tr> </thead> <tbody> <tr> <td>Age (years)</td> <td></td> <td></td> <td></td> <td></td> </tr> <tr> <td>&lt;65</td> <td style="text-align: center;">1.9</td> <td style="text-align: center;">6.4</td> <td style="text-align: center;">2.4</td> <td style="text-align: center;">16.0</td> </tr> <tr> <td>65-74</td> <td style="text-align: center;">3.8</td> <td style="text-align: center;">12.8</td> <td style="text-align: center;">5.2</td> <td style="text-align: center;">34.6</td> </tr> <tr> <td>≥ 75</td> <td style="text-align: center;">9.2</td> <td style="text-align: center;">22.4</td> <td style="text-align: center;">12.1</td> <td style="text-align: center;">43.3</td> </tr> </tbody> </table> <hr/>                                                                                                                                                                                                                                                                                                                                                                                                                                                        |                     | Complications |             | Sepsis      |       |             | No    | Yes              | No                | Yes   | Age (years)      |                   |       |                    |                     | <65 | 1.9  | 6.4  | 2.4   | 16.0 | 65-74 | 3.8  | 12.8 | 5.2 | 34.6 | ≥ 75 | 9.2        | 22.4  | 12.1 | 43.3 |      |       |  |      |      |       |  |      |      |       |  |      |      |     |  |      |      |
|                     | Complications                                                                                                                                                                                                                                                                                                                                                                                                                                                                                                                                                                                                                                                                                                                                                                                                                                                                                                                                                                                                                                                                                                                                                                                                                                                                                                                                                                                                                                                                                                                                                                                                          |                     | Sepsis        |             |             |       |             |       |                  |                   |       |                  |                   |       |                    |                     |     |      |      |       |      |       |      |      |     |      |      |            |       |      |      |      |       |  |      |      |       |  |      |      |       |  |      |      |     |  |      |      |
|                     | No                                                                                                                                                                                                                                                                                                                                                                                                                                                                                                                                                                                                                                                                                                                                                                                                                                                                                                                                                                                                                                                                                                                                                                                                                                                                                                                                                                                                                                                                                                                                                                                                                     | Yes                 | No            | Yes         |             |       |             |       |                  |                   |       |                  |                   |       |                    |                     |     |      |      |       |      |       |      |      |     |      |      |            |       |      |      |      |       |  |      |      |       |  |      |      |       |  |      |      |     |  |      |      |
| Age (years)         |                                                                                                                                                                                                                                                                                                                                                                                                                                                                                                                                                                                                                                                                                                                                                                                                                                                                                                                                                                                                                                                                                                                                                                                                                                                                                                                                                                                                                                                                                                                                                                                                                        |                     |               |             |             |       |             |       |                  |                   |       |                  |                   |       |                    |                     |     |      |      |       |      |       |      |      |     |      |      |            |       |      |      |      |       |  |      |      |       |  |      |      |       |  |      |      |     |  |      |      |
| <65                 | 1.9                                                                                                                                                                                                                                                                                                                                                                                                                                                                                                                                                                                                                                                                                                                                                                                                                                                                                                                                                                                                                                                                                                                                                                                                                                                                                                                                                                                                                                                                                                                                                                                                                    | 6.4                 | 2.4           | 16.0        |             |       |             |       |                  |                   |       |                  |                   |       |                    |                     |     |      |      |       |      |       |      |      |     |      |      |            |       |      |      |      |       |  |      |      |       |  |      |      |       |  |      |      |     |  |      |      |
| 65-74               | 3.8                                                                                                                                                                                                                                                                                                                                                                                                                                                                                                                                                                                                                                                                                                                                                                                                                                                                                                                                                                                                                                                                                                                                                                                                                                                                                                                                                                                                                                                                                                                                                                                                                    | 12.8                | 5.2           | 34.6        |             |       |             |       |                  |                   |       |                  |                   |       |                    |                     |     |      |      |       |      |       |      |      |     |      |      |            |       |      |      |      |       |  |      |      |       |  |      |      |       |  |      |      |     |  |      |      |
| ≥ 75                | 9.2                                                                                                                                                                                                                                                                                                                                                                                                                                                                                                                                                                                                                                                                                                                                                                                                                                                                                                                                                                                                                                                                                                                                                                                                                                                                                                                                                                                                                                                                                                                                                                                                                    | 22.4                | 12.1          | 43.3        |             |       |             |       |                  |                   |       |                  |                   |       |                    |                     |     |      |      |       |      |       |      |      |     |      |      |            |       |      |      |      |       |  |      |      |       |  |      |      |       |  |      |      |     |  |      |      |
| Majek et al., 2013  | <hr/> <table style="width: 100%; border-collapse: collapse;"> <thead> <tr> <th style="width: 10%;"></th> <th style="width: 15%;">Subsite</th> <th style="width: 15%;">Age (years)</th> <th style="width: 15%;">Men</th> <th style="width: 15%;">Women</th> </tr> </thead> <tbody> <tr> <td rowspan="5">Right colon</td> <td>15–44</td> <td></td> <td style="text-align: center;">64.9</td> <td style="text-align: center;">68.1</td> </tr> <tr> <td>45–54</td> <td></td> <td style="text-align: center;">61.7</td> <td style="text-align: center;">64.1</td> </tr> <tr> <td>55–64</td> <td></td> <td style="text-align: center;">62.1</td> <td style="text-align: center;">65.7</td> </tr> <tr> <td>65–74</td> <td></td> <td style="text-align: center;">63.7</td> <td style="text-align: center;">64.3</td> </tr> <tr> <td>75+</td> <td></td> <td style="text-align: center;">61.5</td> <td style="text-align: center;">64.3</td> </tr> <tr> <td rowspan="5">Left colon</td> <td>15–44</td> <td></td> <td style="text-align: center;">63.5</td> <td style="text-align: center;">70.2</td> </tr> <tr> <td>45–54</td> <td></td> <td style="text-align: center;">65.4</td> <td style="text-align: center;">67.9</td> </tr> <tr> <td>55–64</td> <td></td> <td style="text-align: center;">69.7</td> <td style="text-align: center;">71.9</td> </tr> <tr> <td>65–74</td> <td></td> <td style="text-align: center;">65.9</td> <td style="text-align: center;">67.1</td> </tr> <tr> <td>75+</td> <td></td> <td style="text-align: center;">58.9</td> <td style="text-align: center;">58.6</td> </tr> </tbody> </table> <hr/> |                     | Subsite       | Age (years) | Men         | Women | Right colon | 15–44 |                  | 64.9              | 68.1  | 45–54            |                   | 61.7  | 64.1               | 55–64               |     | 62.1 | 65.7 | 65–74 |      | 63.7  | 64.3 | 75+  |     | 61.5 | 64.3 | Left colon | 15–44 |      | 63.5 | 70.2 | 45–54 |  | 65.4 | 67.9 | 55–64 |  | 69.7 | 71.9 | 65–74 |  | 65.9 | 67.1 | 75+ |  | 58.9 | 58.6 |
|                     | Subsite                                                                                                                                                                                                                                                                                                                                                                                                                                                                                                                                                                                                                                                                                                                                                                                                                                                                                                                                                                                                                                                                                                                                                                                                                                                                                                                                                                                                                                                                                                                                                                                                                | Age (years)         | Men           | Women       |             |       |             |       |                  |                   |       |                  |                   |       |                    |                     |     |      |      |       |      |       |      |      |     |      |      |            |       |      |      |      |       |  |      |      |       |  |      |      |       |  |      |      |     |  |      |      |
| Right colon         | 15–44                                                                                                                                                                                                                                                                                                                                                                                                                                                                                                                                                                                                                                                                                                                                                                                                                                                                                                                                                                                                                                                                                                                                                                                                                                                                                                                                                                                                                                                                                                                                                                                                                  |                     | 64.9          | 68.1        |             |       |             |       |                  |                   |       |                  |                   |       |                    |                     |     |      |      |       |      |       |      |      |     |      |      |            |       |      |      |      |       |  |      |      |       |  |      |      |       |  |      |      |     |  |      |      |
|                     | 45–54                                                                                                                                                                                                                                                                                                                                                                                                                                                                                                                                                                                                                                                                                                                                                                                                                                                                                                                                                                                                                                                                                                                                                                                                                                                                                                                                                                                                                                                                                                                                                                                                                  |                     | 61.7          | 64.1        |             |       |             |       |                  |                   |       |                  |                   |       |                    |                     |     |      |      |       |      |       |      |      |     |      |      |            |       |      |      |      |       |  |      |      |       |  |      |      |       |  |      |      |     |  |      |      |
|                     | 55–64                                                                                                                                                                                                                                                                                                                                                                                                                                                                                                                                                                                                                                                                                                                                                                                                                                                                                                                                                                                                                                                                                                                                                                                                                                                                                                                                                                                                                                                                                                                                                                                                                  |                     | 62.1          | 65.7        |             |       |             |       |                  |                   |       |                  |                   |       |                    |                     |     |      |      |       |      |       |      |      |     |      |      |            |       |      |      |      |       |  |      |      |       |  |      |      |       |  |      |      |     |  |      |      |
|                     | 65–74                                                                                                                                                                                                                                                                                                                                                                                                                                                                                                                                                                                                                                                                                                                                                                                                                                                                                                                                                                                                                                                                                                                                                                                                                                                                                                                                                                                                                                                                                                                                                                                                                  |                     | 63.7          | 64.3        |             |       |             |       |                  |                   |       |                  |                   |       |                    |                     |     |      |      |       |      |       |      |      |     |      |      |            |       |      |      |      |       |  |      |      |       |  |      |      |       |  |      |      |     |  |      |      |
|                     | 75+                                                                                                                                                                                                                                                                                                                                                                                                                                                                                                                                                                                                                                                                                                                                                                                                                                                                                                                                                                                                                                                                                                                                                                                                                                                                                                                                                                                                                                                                                                                                                                                                                    |                     | 61.5          | 64.3        |             |       |             |       |                  |                   |       |                  |                   |       |                    |                     |     |      |      |       |      |       |      |      |     |      |      |            |       |      |      |      |       |  |      |      |       |  |      |      |       |  |      |      |     |  |      |      |
| Left colon          | 15–44                                                                                                                                                                                                                                                                                                                                                                                                                                                                                                                                                                                                                                                                                                                                                                                                                                                                                                                                                                                                                                                                                                                                                                                                                                                                                                                                                                                                                                                                                                                                                                                                                  |                     | 63.5          | 70.2        |             |       |             |       |                  |                   |       |                  |                   |       |                    |                     |     |      |      |       |      |       |      |      |     |      |      |            |       |      |      |      |       |  |      |      |       |  |      |      |       |  |      |      |     |  |      |      |
|                     | 45–54                                                                                                                                                                                                                                                                                                                                                                                                                                                                                                                                                                                                                                                                                                                                                                                                                                                                                                                                                                                                                                                                                                                                                                                                                                                                                                                                                                                                                                                                                                                                                                                                                  |                     | 65.4          | 67.9        |             |       |             |       |                  |                   |       |                  |                   |       |                    |                     |     |      |      |       |      |       |      |      |     |      |      |            |       |      |      |      |       |  |      |      |       |  |      |      |       |  |      |      |     |  |      |      |
|                     | 55–64                                                                                                                                                                                                                                                                                                                                                                                                                                                                                                                                                                                                                                                                                                                                                                                                                                                                                                                                                                                                                                                                                                                                                                                                                                                                                                                                                                                                                                                                                                                                                                                                                  |                     | 69.7          | 71.9        |             |       |             |       |                  |                   |       |                  |                   |       |                    |                     |     |      |      |       |      |       |      |      |     |      |      |            |       |      |      |      |       |  |      |      |       |  |      |      |       |  |      |      |     |  |      |      |
|                     | 65–74                                                                                                                                                                                                                                                                                                                                                                                                                                                                                                                                                                                                                                                                                                                                                                                                                                                                                                                                                                                                                                                                                                                                                                                                                                                                                                                                                                                                                                                                                                                                                                                                                  |                     | 65.9          | 67.1        |             |       |             |       |                  |                   |       |                  |                   |       |                    |                     |     |      |      |       |      |       |      |      |     |      |      |            |       |      |      |      |       |  |      |      |       |  |      |      |       |  |      |      |     |  |      |      |
|                     | 75+                                                                                                                                                                                                                                                                                                                                                                                                                                                                                                                                                                                                                                                                                                                                                                                                                                                                                                                                                                                                                                                                                                                                                                                                                                                                                                                                                                                                                                                                                                                                                                                                                    |                     | 58.9          | 58.6        |             |       |             |       |                  |                   |       |                  |                   |       |                    |                     |     |      |      |       |      |       |      |      |     |      |      |            |       |      |      |      |       |  |      |      |       |  |      |      |       |  |      |      |     |  |      |      |

| First author, date            | Results                                                                                                                                                                                                                                                                                                                                                                                                                                                                                                                                                                                                                                                                                                                                                                                                                                                                                                                                                                                                                                                                                                                                                                                                                                                                                                                                                                                                                                                                                                                                                                                                                                                                                                                                                                                                                                                                                                                                                                                                                                                                                                                                                                                                                                                                                                                                                                                                                                                                                                                                                                                                                                                                                                                                                                                                                                                                                                                              |                  |                  |                  |                  |       |     |                               |  |  |  |  |  |         |                  |                  |                  |                  |                  |         |                  |                  |                  |                  |                  |                          |  |  |  |  |  |         |                  |                  |                  |                  |                  |         |                  |                  |                  |                  |                  |                              |  |  |  |  |  |         |                  |                  |                  |                  |                  |         |                  |                  |                  |                  |                  |
|-------------------------------|--------------------------------------------------------------------------------------------------------------------------------------------------------------------------------------------------------------------------------------------------------------------------------------------------------------------------------------------------------------------------------------------------------------------------------------------------------------------------------------------------------------------------------------------------------------------------------------------------------------------------------------------------------------------------------------------------------------------------------------------------------------------------------------------------------------------------------------------------------------------------------------------------------------------------------------------------------------------------------------------------------------------------------------------------------------------------------------------------------------------------------------------------------------------------------------------------------------------------------------------------------------------------------------------------------------------------------------------------------------------------------------------------------------------------------------------------------------------------------------------------------------------------------------------------------------------------------------------------------------------------------------------------------------------------------------------------------------------------------------------------------------------------------------------------------------------------------------------------------------------------------------------------------------------------------------------------------------------------------------------------------------------------------------------------------------------------------------------------------------------------------------------------------------------------------------------------------------------------------------------------------------------------------------------------------------------------------------------------------------------------------------------------------------------------------------------------------------------------------------------------------------------------------------------------------------------------------------------------------------------------------------------------------------------------------------------------------------------------------------------------------------------------------------------------------------------------------------------------------------------------------------------------------------------------------------|------------------|------------------|------------------|------------------|-------|-----|-------------------------------|--|--|--|--|--|---------|------------------|------------------|------------------|------------------|------------------|---------|------------------|------------------|------------------|------------------|------------------|--------------------------|--|--|--|--|--|---------|------------------|------------------|------------------|------------------|------------------|---------|------------------|------------------|------------------|------------------|------------------|------------------------------|--|--|--|--|--|---------|------------------|------------------|------------------|------------------|------------------|---------|------------------|------------------|------------------|------------------|------------------|
| Hur et al., 2018              | <p data-bbox="275 252 607 276"><b>5-year relative survival (% - 95%CI)</b></p> <hr/> <p data-bbox="667 336 781 360" style="text-align: center;"><b>Age (years)</b></p> <hr/> <table border="1" style="width: 100%; border-collapse: collapse;"> <thead> <tr> <th style="width: 15%;"></th> <th style="width: 15%; text-align: center;">≤39</th> <th style="width: 15%; text-align: center;">40–49</th> <th style="width: 15%; text-align: center;">50–59</th> <th style="width: 15%; text-align: center;">60–69</th> <th style="width: 15%; text-align: center;">≥70</th> </tr> </thead> <tbody> <tr> <td colspan="6" data-bbox="275 448 539 472">Right side colon (C18.0–18.3)</td> </tr> <tr> <td data-bbox="275 475 360 499">2006–20</td> <td data-bbox="365 475 495 499">78.5 (75.1–81.6)</td> <td data-bbox="499 475 629 499">78.7 (76.5–80.7)</td> <td data-bbox="633 475 763 499">76.9 (75.3–78.3)</td> <td data-bbox="768 475 898 499">74.9 (73.6–76.2)</td> <td data-bbox="902 475 1032 499">62.0 (60.5–63.5)</td> </tr> <tr> <td data-bbox="275 502 360 526">2011–20</td> <td data-bbox="365 502 495 526">79.6 (74.8–83.5)</td> <td data-bbox="499 502 629 526">78.8 (76.0–81.3)</td> <td data-bbox="633 502 763 526">80.5 (79.0–82.0)</td> <td data-bbox="768 502 898 526">79.3 (77.9–80.7)</td> <td data-bbox="902 502 1032 526">64.9 (63.4–66.4)</td> </tr> <tr> <td colspan="6" data-bbox="275 560 501 584">Transverse colon (C18.4)</td> </tr> <tr> <td data-bbox="275 587 360 611">2006–20</td> <td data-bbox="365 587 495 611">69.8 (62.5–76.0)</td> <td data-bbox="499 587 629 611">76.3 (71.9–80.1)</td> <td data-bbox="633 587 763 611">79.7 (76.8–82.4)</td> <td data-bbox="768 587 898 611">78.2 (75.5–80.7)</td> <td data-bbox="902 587 1032 611">58.1 (54.8–61.3)</td> </tr> <tr> <td data-bbox="275 614 360 638">2011–20</td> <td data-bbox="365 614 495 638">78.5 (71.1–84.2)</td> <td data-bbox="499 614 629 638">78.1 (72.7–82.7)</td> <td data-bbox="633 614 763 638">83.3 (80.2–86.1)</td> <td data-bbox="768 614 898 638">80.0 (77.1–82.6)</td> <td data-bbox="902 614 1032 638">66.1 (62.9–69.2)</td> </tr> <tr> <td colspan="6" data-bbox="275 671 524 695">Left side colon (C18.5–18.7)</td> </tr> <tr> <td data-bbox="275 699 360 722">2006–20</td> <td data-bbox="365 699 495 722">70.1 (67.1–73.0)</td> <td data-bbox="499 699 629 722">78.4 (76.9–79.9)</td> <td data-bbox="633 699 763 722">81.8 (80.9–82.8)</td> <td data-bbox="768 699 898 722">80.1 (79.2–81.1)</td> <td data-bbox="902 699 1032 722">66.3 (64.9–67.6)</td> </tr> <tr> <td data-bbox="275 726 360 750">2011–20</td> <td data-bbox="365 726 495 750">74.5 (70.6–77.9)</td> <td data-bbox="499 726 629 750">81.0 (79.2–82.7)</td> <td data-bbox="633 726 763 750">83.8 (82.8–84.8)</td> <td data-bbox="768 726 898 750">83.9 (82.9–84.9)</td> <td data-bbox="902 726 1032 750">69.1 (67.7–70.5)</td> </tr> </tbody> </table> |                  | ≤39              | 40–49            | 50–59            | 60–69 | ≥70 | Right side colon (C18.0–18.3) |  |  |  |  |  | 2006–20 | 78.5 (75.1–81.6) | 78.7 (76.5–80.7) | 76.9 (75.3–78.3) | 74.9 (73.6–76.2) | 62.0 (60.5–63.5) | 2011–20 | 79.6 (74.8–83.5) | 78.8 (76.0–81.3) | 80.5 (79.0–82.0) | 79.3 (77.9–80.7) | 64.9 (63.4–66.4) | Transverse colon (C18.4) |  |  |  |  |  | 2006–20 | 69.8 (62.5–76.0) | 76.3 (71.9–80.1) | 79.7 (76.8–82.4) | 78.2 (75.5–80.7) | 58.1 (54.8–61.3) | 2011–20 | 78.5 (71.1–84.2) | 78.1 (72.7–82.7) | 83.3 (80.2–86.1) | 80.0 (77.1–82.6) | 66.1 (62.9–69.2) | Left side colon (C18.5–18.7) |  |  |  |  |  | 2006–20 | 70.1 (67.1–73.0) | 78.4 (76.9–79.9) | 81.8 (80.9–82.8) | 80.1 (79.2–81.1) | 66.3 (64.9–67.6) | 2011–20 | 74.5 (70.6–77.9) | 81.0 (79.2–82.7) | 83.8 (82.8–84.8) | 83.9 (82.9–84.9) | 69.1 (67.7–70.5) |
|                               | ≤39                                                                                                                                                                                                                                                                                                                                                                                                                                                                                                                                                                                                                                                                                                                                                                                                                                                                                                                                                                                                                                                                                                                                                                                                                                                                                                                                                                                                                                                                                                                                                                                                                                                                                                                                                                                                                                                                                                                                                                                                                                                                                                                                                                                                                                                                                                                                                                                                                                                                                                                                                                                                                                                                                                                                                                                                                                                                                                                                  | 40–49            | 50–59            | 60–69            | ≥70              |       |     |                               |  |  |  |  |  |         |                  |                  |                  |                  |                  |         |                  |                  |                  |                  |                  |                          |  |  |  |  |  |         |                  |                  |                  |                  |                  |         |                  |                  |                  |                  |                  |                              |  |  |  |  |  |         |                  |                  |                  |                  |                  |         |                  |                  |                  |                  |                  |
| Right side colon (C18.0–18.3) |                                                                                                                                                                                                                                                                                                                                                                                                                                                                                                                                                                                                                                                                                                                                                                                                                                                                                                                                                                                                                                                                                                                                                                                                                                                                                                                                                                                                                                                                                                                                                                                                                                                                                                                                                                                                                                                                                                                                                                                                                                                                                                                                                                                                                                                                                                                                                                                                                                                                                                                                                                                                                                                                                                                                                                                                                                                                                                                                      |                  |                  |                  |                  |       |     |                               |  |  |  |  |  |         |                  |                  |                  |                  |                  |         |                  |                  |                  |                  |                  |                          |  |  |  |  |  |         |                  |                  |                  |                  |                  |         |                  |                  |                  |                  |                  |                              |  |  |  |  |  |         |                  |                  |                  |                  |                  |         |                  |                  |                  |                  |                  |
| 2006–20                       | 78.5 (75.1–81.6)                                                                                                                                                                                                                                                                                                                                                                                                                                                                                                                                                                                                                                                                                                                                                                                                                                                                                                                                                                                                                                                                                                                                                                                                                                                                                                                                                                                                                                                                                                                                                                                                                                                                                                                                                                                                                                                                                                                                                                                                                                                                                                                                                                                                                                                                                                                                                                                                                                                                                                                                                                                                                                                                                                                                                                                                                                                                                                                     | 78.7 (76.5–80.7) | 76.9 (75.3–78.3) | 74.9 (73.6–76.2) | 62.0 (60.5–63.5) |       |     |                               |  |  |  |  |  |         |                  |                  |                  |                  |                  |         |                  |                  |                  |                  |                  |                          |  |  |  |  |  |         |                  |                  |                  |                  |                  |         |                  |                  |                  |                  |                  |                              |  |  |  |  |  |         |                  |                  |                  |                  |                  |         |                  |                  |                  |                  |                  |
| 2011–20                       | 79.6 (74.8–83.5)                                                                                                                                                                                                                                                                                                                                                                                                                                                                                                                                                                                                                                                                                                                                                                                                                                                                                                                                                                                                                                                                                                                                                                                                                                                                                                                                                                                                                                                                                                                                                                                                                                                                                                                                                                                                                                                                                                                                                                                                                                                                                                                                                                                                                                                                                                                                                                                                                                                                                                                                                                                                                                                                                                                                                                                                                                                                                                                     | 78.8 (76.0–81.3) | 80.5 (79.0–82.0) | 79.3 (77.9–80.7) | 64.9 (63.4–66.4) |       |     |                               |  |  |  |  |  |         |                  |                  |                  |                  |                  |         |                  |                  |                  |                  |                  |                          |  |  |  |  |  |         |                  |                  |                  |                  |                  |         |                  |                  |                  |                  |                  |                              |  |  |  |  |  |         |                  |                  |                  |                  |                  |         |                  |                  |                  |                  |                  |
| Transverse colon (C18.4)      |                                                                                                                                                                                                                                                                                                                                                                                                                                                                                                                                                                                                                                                                                                                                                                                                                                                                                                                                                                                                                                                                                                                                                                                                                                                                                                                                                                                                                                                                                                                                                                                                                                                                                                                                                                                                                                                                                                                                                                                                                                                                                                                                                                                                                                                                                                                                                                                                                                                                                                                                                                                                                                                                                                                                                                                                                                                                                                                                      |                  |                  |                  |                  |       |     |                               |  |  |  |  |  |         |                  |                  |                  |                  |                  |         |                  |                  |                  |                  |                  |                          |  |  |  |  |  |         |                  |                  |                  |                  |                  |         |                  |                  |                  |                  |                  |                              |  |  |  |  |  |         |                  |                  |                  |                  |                  |         |                  |                  |                  |                  |                  |
| 2006–20                       | 69.8 (62.5–76.0)                                                                                                                                                                                                                                                                                                                                                                                                                                                                                                                                                                                                                                                                                                                                                                                                                                                                                                                                                                                                                                                                                                                                                                                                                                                                                                                                                                                                                                                                                                                                                                                                                                                                                                                                                                                                                                                                                                                                                                                                                                                                                                                                                                                                                                                                                                                                                                                                                                                                                                                                                                                                                                                                                                                                                                                                                                                                                                                     | 76.3 (71.9–80.1) | 79.7 (76.8–82.4) | 78.2 (75.5–80.7) | 58.1 (54.8–61.3) |       |     |                               |  |  |  |  |  |         |                  |                  |                  |                  |                  |         |                  |                  |                  |                  |                  |                          |  |  |  |  |  |         |                  |                  |                  |                  |                  |         |                  |                  |                  |                  |                  |                              |  |  |  |  |  |         |                  |                  |                  |                  |                  |         |                  |                  |                  |                  |                  |
| 2011–20                       | 78.5 (71.1–84.2)                                                                                                                                                                                                                                                                                                                                                                                                                                                                                                                                                                                                                                                                                                                                                                                                                                                                                                                                                                                                                                                                                                                                                                                                                                                                                                                                                                                                                                                                                                                                                                                                                                                                                                                                                                                                                                                                                                                                                                                                                                                                                                                                                                                                                                                                                                                                                                                                                                                                                                                                                                                                                                                                                                                                                                                                                                                                                                                     | 78.1 (72.7–82.7) | 83.3 (80.2–86.1) | 80.0 (77.1–82.6) | 66.1 (62.9–69.2) |       |     |                               |  |  |  |  |  |         |                  |                  |                  |                  |                  |         |                  |                  |                  |                  |                  |                          |  |  |  |  |  |         |                  |                  |                  |                  |                  |         |                  |                  |                  |                  |                  |                              |  |  |  |  |  |         |                  |                  |                  |                  |                  |         |                  |                  |                  |                  |                  |
| Left side colon (C18.5–18.7)  |                                                                                                                                                                                                                                                                                                                                                                                                                                                                                                                                                                                                                                                                                                                                                                                                                                                                                                                                                                                                                                                                                                                                                                                                                                                                                                                                                                                                                                                                                                                                                                                                                                                                                                                                                                                                                                                                                                                                                                                                                                                                                                                                                                                                                                                                                                                                                                                                                                                                                                                                                                                                                                                                                                                                                                                                                                                                                                                                      |                  |                  |                  |                  |       |     |                               |  |  |  |  |  |         |                  |                  |                  |                  |                  |         |                  |                  |                  |                  |                  |                          |  |  |  |  |  |         |                  |                  |                  |                  |                  |         |                  |                  |                  |                  |                  |                              |  |  |  |  |  |         |                  |                  |                  |                  |                  |         |                  |                  |                  |                  |                  |
| 2006–20                       | 70.1 (67.1–73.0)                                                                                                                                                                                                                                                                                                                                                                                                                                                                                                                                                                                                                                                                                                                                                                                                                                                                                                                                                                                                                                                                                                                                                                                                                                                                                                                                                                                                                                                                                                                                                                                                                                                                                                                                                                                                                                                                                                                                                                                                                                                                                                                                                                                                                                                                                                                                                                                                                                                                                                                                                                                                                                                                                                                                                                                                                                                                                                                     | 78.4 (76.9–79.9) | 81.8 (80.9–82.8) | 80.1 (79.2–81.1) | 66.3 (64.9–67.6) |       |     |                               |  |  |  |  |  |         |                  |                  |                  |                  |                  |         |                  |                  |                  |                  |                  |                          |  |  |  |  |  |         |                  |                  |                  |                  |                  |         |                  |                  |                  |                  |                  |                              |  |  |  |  |  |         |                  |                  |                  |                  |                  |         |                  |                  |                  |                  |                  |
| 2011–20                       | 74.5 (70.6–77.9)                                                                                                                                                                                                                                                                                                                                                                                                                                                                                                                                                                                                                                                                                                                                                                                                                                                                                                                                                                                                                                                                                                                                                                                                                                                                                                                                                                                                                                                                                                                                                                                                                                                                                                                                                                                                                                                                                                                                                                                                                                                                                                                                                                                                                                                                                                                                                                                                                                                                                                                                                                                                                                                                                                                                                                                                                                                                                                                     | 81.0 (79.2–82.7) | 83.8 (82.8–84.8) | 83.9 (82.9–84.9) | 69.1 (67.7–70.5) |       |     |                               |  |  |  |  |  |         |                  |                  |                  |                  |                  |         |                  |                  |                  |                  |                  |                          |  |  |  |  |  |         |                  |                  |                  |                  |                  |         |                  |                  |                  |                  |                  |                              |  |  |  |  |  |         |                  |                  |                  |                  |                  |         |                  |                  |                  |                  |                  |

**Supplementary Table 6.** Numerical estimates for survival metrics extracted from included studies about lung cancer

| First author, date           | Results                         |                    |                    |    |                             |       |                    |   |   |   |
|------------------------------|---------------------------------|--------------------|--------------------|----|-----------------------------|-------|--------------------|---|---|---|
| Lung cancer                  |                                 |                    |                    |    |                             |       |                    |   |   |   |
| Wingo et al., 1998           | <b>5-year relative survival</b> |                    |                    |    | <b><i>Distant stage</i></b> |       |                    |   |   |   |
|                              | <b><i>Local stage</i></b>       |                    |                    |    |                             |       |                    |   |   |   |
|                              | <i>White</i>                    |                    | <i>Black</i>       |    | <i>White</i>                |       | <i>Black</i>       |   |   |   |
|                              | <i>Male Female</i>              |                    | <i>Male Female</i> |    | <i>Male Female</i>          |       | <i>Male Female</i> |   |   |   |
|                              | Age (years)                     |                    |                    |    | Age (years)                 |       |                    |   |   |   |
|                              | <45                             | 62                 | 75                 | 46 | 56                          | <45   | 2                  | 4 | 4 | 4 |
|                              | 45-54                           | 49                 | 61                 | 36 | 47                          | 45-54 | 2                  | 3 | 2 | 2 |
|                              | 55-64                           | 43                 | 54                 | 33 | 46                          | 55-64 | 1                  | 2 | 1 | 1 |
|                              | 65-74                           | 33                 | 44                 | 29 | 31                          | 65-74 | 1                  | 1 | 1 | 1 |
|                              | ≥ 75                            | 20                 | 30                 | 16 | 24                          | ≥ 75  | 1                  | 1 | 1 | 1 |
| <b><i>Regional stage</i></b> |                                 |                    |                    |    |                             |       |                    |   |   |   |
| <i>White</i>                 |                                 | <i>Black</i>       |                    |    |                             |       |                    |   |   |   |
| <i>Male Female</i>           |                                 | <i>Male Female</i> |                    |    |                             |       |                    |   |   |   |
| Age (years)                  |                                 |                    |                    |    |                             |       |                    |   |   |   |
| <45                          | 24                              | 28                 | 19                 | 19 |                             |       |                    |   |   |   |
| 45-54                        | 17                              | 22                 | 13                 | 16 |                             |       |                    |   |   |   |
| 55-64                        | 15                              | 18                 | 12                 | 19 |                             |       |                    |   |   |   |
| 65-74                        | 12                              | 15                 | 10                 | 11 |                             |       |                    |   |   |   |
| ≥ 75                         | 7                               | 12                 | 4                  | 8  |                             |       |                    |   |   |   |

| First author, date         |                                                                                                                                                                                                                                                                                                                                                                                                                                                                                                                                                                                                                                                                                                                                                                                                                                                                                                                                                                                                                                                                                                                                                                                                                                                                                                                                                                                                                                                                                                                                                                                                                                    |                      | Results        |            |  |         |                    |  |        |        |        |           |          |          |         |                    |  |                  |  |  |       |            |            |           |            |       |            |            |           |            |       |            |            |           |            |     |            |            |           |           |    |          |                            |  |  |  |  |       |    |            |    |           |       |    |            |    |           |       |    |           |    |            |     |    |         |    |           |                           |  |  |  |  |       |    |   |    |         |       |    |         |    |         |       |    |         |    |         |     |    |         |    |         |                                                                                                                                                                                                                                                                                                                                                                                                                                                                                                                                                                                                                                                                                                                                                                                                                                                                                                                                                                                            |  |  |  |  |                         |                      |                |              |  |  |  |       |           |          |            |       |            |         |            |       |            |         |            |     |         |         |          |                |  |  |  |       |           |   |            |       |            |          |            |       |            |         |            |     |         |   |          |
|----------------------------|------------------------------------------------------------------------------------------------------------------------------------------------------------------------------------------------------------------------------------------------------------------------------------------------------------------------------------------------------------------------------------------------------------------------------------------------------------------------------------------------------------------------------------------------------------------------------------------------------------------------------------------------------------------------------------------------------------------------------------------------------------------------------------------------------------------------------------------------------------------------------------------------------------------------------------------------------------------------------------------------------------------------------------------------------------------------------------------------------------------------------------------------------------------------------------------------------------------------------------------------------------------------------------------------------------------------------------------------------------------------------------------------------------------------------------------------------------------------------------------------------------------------------------------------------------------------------------------------------------------------------------|----------------------|----------------|------------|--|---------|--------------------|--|--------|--------|--------|-----------|----------|----------|---------|--------------------|--|------------------|--|--|-------|------------|------------|-----------|------------|-------|------------|------------|-----------|------------|-------|------------|------------|-----------|------------|-----|------------|------------|-----------|-----------|----|----------|----------------------------|--|--|--|--|-------|----|------------|----|-----------|-------|----|------------|----|-----------|-------|----|-----------|----|------------|-----|----|---------|----|-----------|---------------------------|--|--|--|--|-------|----|---|----|---------|-------|----|---------|----|---------|-------|----|---------|----|---------|-----|----|---------|----|---------|--------------------------------------------------------------------------------------------------------------------------------------------------------------------------------------------------------------------------------------------------------------------------------------------------------------------------------------------------------------------------------------------------------------------------------------------------------------------------------------------------------------------------------------------------------------------------------------------------------------------------------------------------------------------------------------------------------------------------------------------------------------------------------------------------------------------------------------------------------------------------------------------------------------------------------------------------------------------------------------------|--|--|--|--|-------------------------|----------------------|----------------|--------------|--|--|--|-------|-----------|----------|------------|-------|------------|---------|------------|-------|------------|---------|------------|-----|---------|---------|----------|----------------|--|--|--|-------|-----------|---|------------|-------|------------|----------|------------|-------|------------|---------|------------|-----|---------|---|----------|
| Dickman et al., 1999       | <b>1-year and 5-year relative survival rates (95%CI)</b><br><hr/> <table border="0"> <thead> <tr> <th></th> <th colspan="2">Males</th> <th colspan="2">Females</th> </tr> <tr> <th></th> <th>1-year</th> <th>5-year</th> <th>1-year</th> <th>5-year</th> </tr> <tr> <th></th> <th colspan="2">(95% CI)</th> <th colspan="2">(95% CI)</th> </tr> </thead> <tbody> <tr> <td colspan="5"><b>Localized</b></td> </tr> <tr> <td>30-44</td> <td>78</td> <td>58 (43-74)</td> <td>92</td> <td>80 (66-94)</td> </tr> <tr> <td>45-59</td> <td>80</td> <td>41 (36-45)</td> <td>91</td> <td>56 (46-66)</td> </tr> <tr> <td>60-74</td> <td>70</td> <td>29 (27-31)</td> <td>73</td> <td>36 (31-42)</td> </tr> <tr> <td>≥75</td> <td>56</td> <td>10 (7-13)</td> <td>48</td> <td>8 (2-15)</td> </tr> <tr> <td colspan="5"><b>Regional metastases</b></td> </tr> <tr> <td>30-44</td> <td>72</td> <td>26 (12-41)</td> <td>65</td> <td>14 (0-31)</td> </tr> <tr> <td>45-59</td> <td>62</td> <td>15 (11-20)</td> <td>64</td> <td>15 (7-24)</td> </tr> <tr> <td>60-74</td> <td>51</td> <td>12 (9-14)</td> <td>62</td> <td>19 (12-26)</td> </tr> <tr> <td>≥75</td> <td>41</td> <td>4 (0-9)</td> <td>30</td> <td>10 (0-21)</td> </tr> <tr> <td colspan="5"><b>Distant metastases</b></td> </tr> <tr> <td>30-44</td> <td>20</td> <td>0</td> <td>28</td> <td>2 (0-6)</td> </tr> <tr> <td>45-59</td> <td>22</td> <td>2 (1-2)</td> <td>27</td> <td>3 (1-5)</td> </tr> <tr> <td>60-74</td> <td>20</td> <td>1 (1-1)</td> <td>25</td> <td>3 (1-4)</td> </tr> <tr> <td>≥75</td> <td>15</td> <td>1 (0-1)</td> <td>13</td> <td>1 (0-2)</td> </tr> </tbody> </table> |                      |                | Males      |  | Females |                    |  | 1-year | 5-year | 1-year | 5-year    |          | (95% CI) |         | (95% CI)           |  | <b>Localized</b> |  |  |       |            | 30-44      | 78        | 58 (43-74) | 92    | 80 (66-94) | 45-59      | 80        | 41 (36-45) | 91    | 56 (46-66) | 60-74      | 70        | 29 (27-31) | 73  | 36 (31-42) | ≥75        | 56        | 10 (7-13) | 48 | 8 (2-15) | <b>Regional metastases</b> |  |  |  |  | 30-44 | 72 | 26 (12-41) | 65 | 14 (0-31) | 45-59 | 62 | 15 (11-20) | 64 | 15 (7-24) | 60-74 | 51 | 12 (9-14) | 62 | 19 (12-26) | ≥75 | 41 | 4 (0-9) | 30 | 10 (0-21) | <b>Distant metastases</b> |  |  |  |  | 30-44 | 20 | 0 | 28 | 2 (0-6) | 45-59 | 22 | 2 (1-2) | 27 | 3 (1-5) | 60-74 | 20 | 1 (1-1) | 25 | 3 (1-4) | ≥75 | 15 | 1 (0-1) | 13 | 1 (0-2) | <b>5-year relative survival rates (95%CI)</b><br><hr/> <table border="0"> <thead> <tr> <th></th> <th>Squamous cell carcinoma</th> <th>Small cell carcinoma</th> <th>Adenocarcinoma</th> </tr> </thead> <tbody> <tr> <td colspan="4"><b>Males</b></td> </tr> <tr> <td>30-44</td> <td>19 (8-30)</td> <td>6 (0-13)</td> <td>29 (20-39)</td> </tr> <tr> <td>45-59</td> <td>20 (17-23)</td> <td>4 (2-6)</td> <td>19 (15-23)</td> </tr> <tr> <td>60-74</td> <td>17 (16-19)</td> <td>3 (2-4)</td> <td>15 (13-18)</td> </tr> <tr> <td>≥75</td> <td>6 (4-8)</td> <td>3 (1-5)</td> <td>6 (2-10)</td> </tr> <tr> <td colspan="4"><b>Females</b></td> </tr> <tr> <td>30-44</td> <td>18 (2-33)</td> <td>·</td> <td>37 (24-50)</td> </tr> <tr> <td>45-59</td> <td>19 (11-27)</td> <td>9 (4-15)</td> <td>26 (19-32)</td> </tr> <tr> <td>60-74</td> <td>18 (13-23)</td> <td>4 (1-6)</td> <td>26 (21-30)</td> </tr> <tr> <td>≥75</td> <td>5 (0-9)</td> <td>·</td> <td>7 (2-12)</td> </tr> </tbody> </table> |  |  |  |  | Squamous cell carcinoma | Small cell carcinoma | Adenocarcinoma | <b>Males</b> |  |  |  | 30-44 | 19 (8-30) | 6 (0-13) | 29 (20-39) | 45-59 | 20 (17-23) | 4 (2-6) | 19 (15-23) | 60-74 | 17 (16-19) | 3 (2-4) | 15 (13-18) | ≥75 | 6 (4-8) | 3 (1-5) | 6 (2-10) | <b>Females</b> |  |  |  | 30-44 | 18 (2-33) | · | 37 (24-50) | 45-59 | 19 (11-27) | 9 (4-15) | 26 (19-32) | 60-74 | 18 (13-23) | 4 (1-6) | 26 (21-30) | ≥75 | 5 (0-9) | · | 7 (2-12) |
|                            | Males                                                                                                                                                                                                                                                                                                                                                                                                                                                                                                                                                                                                                                                                                                                                                                                                                                                                                                                                                                                                                                                                                                                                                                                                                                                                                                                                                                                                                                                                                                                                                                                                                              |                      | Females        |            |  |         |                    |  |        |        |        |           |          |          |         |                    |  |                  |  |  |       |            |            |           |            |       |            |            |           |            |       |            |            |           |            |     |            |            |           |           |    |          |                            |  |  |  |  |       |    |            |    |           |       |    |            |    |           |       |    |           |    |            |     |    |         |    |           |                           |  |  |  |  |       |    |   |    |         |       |    |         |    |         |       |    |         |    |         |     |    |         |    |         |                                                                                                                                                                                                                                                                                                                                                                                                                                                                                                                                                                                                                                                                                                                                                                                                                                                                                                                                                                                            |  |  |  |  |                         |                      |                |              |  |  |  |       |           |          |            |       |            |         |            |       |            |         |            |     |         |         |          |                |  |  |  |       |           |   |            |       |            |          |            |       |            |         |            |     |         |   |          |
|                            | 1-year                                                                                                                                                                                                                                                                                                                                                                                                                                                                                                                                                                                                                                                                                                                                                                                                                                                                                                                                                                                                                                                                                                                                                                                                                                                                                                                                                                                                                                                                                                                                                                                                                             | 5-year               | 1-year         | 5-year     |  |         |                    |  |        |        |        |           |          |          |         |                    |  |                  |  |  |       |            |            |           |            |       |            |            |           |            |       |            |            |           |            |     |            |            |           |           |    |          |                            |  |  |  |  |       |    |            |    |           |       |    |            |    |           |       |    |           |    |            |     |    |         |    |           |                           |  |  |  |  |       |    |   |    |         |       |    |         |    |         |       |    |         |    |         |     |    |         |    |         |                                                                                                                                                                                                                                                                                                                                                                                                                                                                                                                                                                                                                                                                                                                                                                                                                                                                                                                                                                                            |  |  |  |  |                         |                      |                |              |  |  |  |       |           |          |            |       |            |         |            |       |            |         |            |     |         |         |          |                |  |  |  |       |           |   |            |       |            |          |            |       |            |         |            |     |         |   |          |
|                            | (95% CI)                                                                                                                                                                                                                                                                                                                                                                                                                                                                                                                                                                                                                                                                                                                                                                                                                                                                                                                                                                                                                                                                                                                                                                                                                                                                                                                                                                                                                                                                                                                                                                                                                           |                      | (95% CI)       |            |  |         |                    |  |        |        |        |           |          |          |         |                    |  |                  |  |  |       |            |            |           |            |       |            |            |           |            |       |            |            |           |            |     |            |            |           |           |    |          |                            |  |  |  |  |       |    |            |    |           |       |    |            |    |           |       |    |           |    |            |     |    |         |    |           |                           |  |  |  |  |       |    |   |    |         |       |    |         |    |         |       |    |         |    |         |     |    |         |    |         |                                                                                                                                                                                                                                                                                                                                                                                                                                                                                                                                                                                                                                                                                                                                                                                                                                                                                                                                                                                            |  |  |  |  |                         |                      |                |              |  |  |  |       |           |          |            |       |            |         |            |       |            |         |            |     |         |         |          |                |  |  |  |       |           |   |            |       |            |          |            |       |            |         |            |     |         |   |          |
| <b>Localized</b>           |                                                                                                                                                                                                                                                                                                                                                                                                                                                                                                                                                                                                                                                                                                                                                                                                                                                                                                                                                                                                                                                                                                                                                                                                                                                                                                                                                                                                                                                                                                                                                                                                                                    |                      |                |            |  |         |                    |  |        |        |        |           |          |          |         |                    |  |                  |  |  |       |            |            |           |            |       |            |            |           |            |       |            |            |           |            |     |            |            |           |           |    |          |                            |  |  |  |  |       |    |            |    |           |       |    |            |    |           |       |    |           |    |            |     |    |         |    |           |                           |  |  |  |  |       |    |   |    |         |       |    |         |    |         |       |    |         |    |         |     |    |         |    |         |                                                                                                                                                                                                                                                                                                                                                                                                                                                                                                                                                                                                                                                                                                                                                                                                                                                                                                                                                                                            |  |  |  |  |                         |                      |                |              |  |  |  |       |           |          |            |       |            |         |            |       |            |         |            |     |         |         |          |                |  |  |  |       |           |   |            |       |            |          |            |       |            |         |            |     |         |   |          |
| 30-44                      | 78                                                                                                                                                                                                                                                                                                                                                                                                                                                                                                                                                                                                                                                                                                                                                                                                                                                                                                                                                                                                                                                                                                                                                                                                                                                                                                                                                                                                                                                                                                                                                                                                                                 | 58 (43-74)           | 92             | 80 (66-94) |  |         |                    |  |        |        |        |           |          |          |         |                    |  |                  |  |  |       |            |            |           |            |       |            |            |           |            |       |            |            |           |            |     |            |            |           |           |    |          |                            |  |  |  |  |       |    |            |    |           |       |    |            |    |           |       |    |           |    |            |     |    |         |    |           |                           |  |  |  |  |       |    |   |    |         |       |    |         |    |         |       |    |         |    |         |     |    |         |    |         |                                                                                                                                                                                                                                                                                                                                                                                                                                                                                                                                                                                                                                                                                                                                                                                                                                                                                                                                                                                            |  |  |  |  |                         |                      |                |              |  |  |  |       |           |          |            |       |            |         |            |       |            |         |            |     |         |         |          |                |  |  |  |       |           |   |            |       |            |          |            |       |            |         |            |     |         |   |          |
| 45-59                      | 80                                                                                                                                                                                                                                                                                                                                                                                                                                                                                                                                                                                                                                                                                                                                                                                                                                                                                                                                                                                                                                                                                                                                                                                                                                                                                                                                                                                                                                                                                                                                                                                                                                 | 41 (36-45)           | 91             | 56 (46-66) |  |         |                    |  |        |        |        |           |          |          |         |                    |  |                  |  |  |       |            |            |           |            |       |            |            |           |            |       |            |            |           |            |     |            |            |           |           |    |          |                            |  |  |  |  |       |    |            |    |           |       |    |            |    |           |       |    |           |    |            |     |    |         |    |           |                           |  |  |  |  |       |    |   |    |         |       |    |         |    |         |       |    |         |    |         |     |    |         |    |         |                                                                                                                                                                                                                                                                                                                                                                                                                                                                                                                                                                                                                                                                                                                                                                                                                                                                                                                                                                                            |  |  |  |  |                         |                      |                |              |  |  |  |       |           |          |            |       |            |         |            |       |            |         |            |     |         |         |          |                |  |  |  |       |           |   |            |       |            |          |            |       |            |         |            |     |         |   |          |
| 60-74                      | 70                                                                                                                                                                                                                                                                                                                                                                                                                                                                                                                                                                                                                                                                                                                                                                                                                                                                                                                                                                                                                                                                                                                                                                                                                                                                                                                                                                                                                                                                                                                                                                                                                                 | 29 (27-31)           | 73             | 36 (31-42) |  |         |                    |  |        |        |        |           |          |          |         |                    |  |                  |  |  |       |            |            |           |            |       |            |            |           |            |       |            |            |           |            |     |            |            |           |           |    |          |                            |  |  |  |  |       |    |            |    |           |       |    |            |    |           |       |    |           |    |            |     |    |         |    |           |                           |  |  |  |  |       |    |   |    |         |       |    |         |    |         |       |    |         |    |         |     |    |         |    |         |                                                                                                                                                                                                                                                                                                                                                                                                                                                                                                                                                                                                                                                                                                                                                                                                                                                                                                                                                                                            |  |  |  |  |                         |                      |                |              |  |  |  |       |           |          |            |       |            |         |            |       |            |         |            |     |         |         |          |                |  |  |  |       |           |   |            |       |            |          |            |       |            |         |            |     |         |   |          |
| ≥75                        | 56                                                                                                                                                                                                                                                                                                                                                                                                                                                                                                                                                                                                                                                                                                                                                                                                                                                                                                                                                                                                                                                                                                                                                                                                                                                                                                                                                                                                                                                                                                                                                                                                                                 | 10 (7-13)            | 48             | 8 (2-15)   |  |         |                    |  |        |        |        |           |          |          |         |                    |  |                  |  |  |       |            |            |           |            |       |            |            |           |            |       |            |            |           |            |     |            |            |           |           |    |          |                            |  |  |  |  |       |    |            |    |           |       |    |            |    |           |       |    |           |    |            |     |    |         |    |           |                           |  |  |  |  |       |    |   |    |         |       |    |         |    |         |       |    |         |    |         |     |    |         |    |         |                                                                                                                                                                                                                                                                                                                                                                                                                                                                                                                                                                                                                                                                                                                                                                                                                                                                                                                                                                                            |  |  |  |  |                         |                      |                |              |  |  |  |       |           |          |            |       |            |         |            |       |            |         |            |     |         |         |          |                |  |  |  |       |           |   |            |       |            |          |            |       |            |         |            |     |         |   |          |
| <b>Regional metastases</b> |                                                                                                                                                                                                                                                                                                                                                                                                                                                                                                                                                                                                                                                                                                                                                                                                                                                                                                                                                                                                                                                                                                                                                                                                                                                                                                                                                                                                                                                                                                                                                                                                                                    |                      |                |            |  |         |                    |  |        |        |        |           |          |          |         |                    |  |                  |  |  |       |            |            |           |            |       |            |            |           |            |       |            |            |           |            |     |            |            |           |           |    |          |                            |  |  |  |  |       |    |            |    |           |       |    |            |    |           |       |    |           |    |            |     |    |         |    |           |                           |  |  |  |  |       |    |   |    |         |       |    |         |    |         |       |    |         |    |         |     |    |         |    |         |                                                                                                                                                                                                                                                                                                                                                                                                                                                                                                                                                                                                                                                                                                                                                                                                                                                                                                                                                                                            |  |  |  |  |                         |                      |                |              |  |  |  |       |           |          |            |       |            |         |            |       |            |         |            |     |         |         |          |                |  |  |  |       |           |   |            |       |            |          |            |       |            |         |            |     |         |   |          |
| 30-44                      | 72                                                                                                                                                                                                                                                                                                                                                                                                                                                                                                                                                                                                                                                                                                                                                                                                                                                                                                                                                                                                                                                                                                                                                                                                                                                                                                                                                                                                                                                                                                                                                                                                                                 | 26 (12-41)           | 65             | 14 (0-31)  |  |         |                    |  |        |        |        |           |          |          |         |                    |  |                  |  |  |       |            |            |           |            |       |            |            |           |            |       |            |            |           |            |     |            |            |           |           |    |          |                            |  |  |  |  |       |    |            |    |           |       |    |            |    |           |       |    |           |    |            |     |    |         |    |           |                           |  |  |  |  |       |    |   |    |         |       |    |         |    |         |       |    |         |    |         |     |    |         |    |         |                                                                                                                                                                                                                                                                                                                                                                                                                                                                                                                                                                                                                                                                                                                                                                                                                                                                                                                                                                                            |  |  |  |  |                         |                      |                |              |  |  |  |       |           |          |            |       |            |         |            |       |            |         |            |     |         |         |          |                |  |  |  |       |           |   |            |       |            |          |            |       |            |         |            |     |         |   |          |
| 45-59                      | 62                                                                                                                                                                                                                                                                                                                                                                                                                                                                                                                                                                                                                                                                                                                                                                                                                                                                                                                                                                                                                                                                                                                                                                                                                                                                                                                                                                                                                                                                                                                                                                                                                                 | 15 (11-20)           | 64             | 15 (7-24)  |  |         |                    |  |        |        |        |           |          |          |         |                    |  |                  |  |  |       |            |            |           |            |       |            |            |           |            |       |            |            |           |            |     |            |            |           |           |    |          |                            |  |  |  |  |       |    |            |    |           |       |    |            |    |           |       |    |           |    |            |     |    |         |    |           |                           |  |  |  |  |       |    |   |    |         |       |    |         |    |         |       |    |         |    |         |     |    |         |    |         |                                                                                                                                                                                                                                                                                                                                                                                                                                                                                                                                                                                                                                                                                                                                                                                                                                                                                                                                                                                            |  |  |  |  |                         |                      |                |              |  |  |  |       |           |          |            |       |            |         |            |       |            |         |            |     |         |         |          |                |  |  |  |       |           |   |            |       |            |          |            |       |            |         |            |     |         |   |          |
| 60-74                      | 51                                                                                                                                                                                                                                                                                                                                                                                                                                                                                                                                                                                                                                                                                                                                                                                                                                                                                                                                                                                                                                                                                                                                                                                                                                                                                                                                                                                                                                                                                                                                                                                                                                 | 12 (9-14)            | 62             | 19 (12-26) |  |         |                    |  |        |        |        |           |          |          |         |                    |  |                  |  |  |       |            |            |           |            |       |            |            |           |            |       |            |            |           |            |     |            |            |           |           |    |          |                            |  |  |  |  |       |    |            |    |           |       |    |            |    |           |       |    |           |    |            |     |    |         |    |           |                           |  |  |  |  |       |    |   |    |         |       |    |         |    |         |       |    |         |    |         |     |    |         |    |         |                                                                                                                                                                                                                                                                                                                                                                                                                                                                                                                                                                                                                                                                                                                                                                                                                                                                                                                                                                                            |  |  |  |  |                         |                      |                |              |  |  |  |       |           |          |            |       |            |         |            |       |            |         |            |     |         |         |          |                |  |  |  |       |           |   |            |       |            |          |            |       |            |         |            |     |         |   |          |
| ≥75                        | 41                                                                                                                                                                                                                                                                                                                                                                                                                                                                                                                                                                                                                                                                                                                                                                                                                                                                                                                                                                                                                                                                                                                                                                                                                                                                                                                                                                                                                                                                                                                                                                                                                                 | 4 (0-9)              | 30             | 10 (0-21)  |  |         |                    |  |        |        |        |           |          |          |         |                    |  |                  |  |  |       |            |            |           |            |       |            |            |           |            |       |            |            |           |            |     |            |            |           |           |    |          |                            |  |  |  |  |       |    |            |    |           |       |    |            |    |           |       |    |           |    |            |     |    |         |    |           |                           |  |  |  |  |       |    |   |    |         |       |    |         |    |         |       |    |         |    |         |     |    |         |    |         |                                                                                                                                                                                                                                                                                                                                                                                                                                                                                                                                                                                                                                                                                                                                                                                                                                                                                                                                                                                            |  |  |  |  |                         |                      |                |              |  |  |  |       |           |          |            |       |            |         |            |       |            |         |            |     |         |         |          |                |  |  |  |       |           |   |            |       |            |          |            |       |            |         |            |     |         |   |          |
| <b>Distant metastases</b>  |                                                                                                                                                                                                                                                                                                                                                                                                                                                                                                                                                                                                                                                                                                                                                                                                                                                                                                                                                                                                                                                                                                                                                                                                                                                                                                                                                                                                                                                                                                                                                                                                                                    |                      |                |            |  |         |                    |  |        |        |        |           |          |          |         |                    |  |                  |  |  |       |            |            |           |            |       |            |            |           |            |       |            |            |           |            |     |            |            |           |           |    |          |                            |  |  |  |  |       |    |            |    |           |       |    |            |    |           |       |    |           |    |            |     |    |         |    |           |                           |  |  |  |  |       |    |   |    |         |       |    |         |    |         |       |    |         |    |         |     |    |         |    |         |                                                                                                                                                                                                                                                                                                                                                                                                                                                                                                                                                                                                                                                                                                                                                                                                                                                                                                                                                                                            |  |  |  |  |                         |                      |                |              |  |  |  |       |           |          |            |       |            |         |            |       |            |         |            |     |         |         |          |                |  |  |  |       |           |   |            |       |            |          |            |       |            |         |            |     |         |   |          |
| 30-44                      | 20                                                                                                                                                                                                                                                                                                                                                                                                                                                                                                                                                                                                                                                                                                                                                                                                                                                                                                                                                                                                                                                                                                                                                                                                                                                                                                                                                                                                                                                                                                                                                                                                                                 | 0                    | 28             | 2 (0-6)    |  |         |                    |  |        |        |        |           |          |          |         |                    |  |                  |  |  |       |            |            |           |            |       |            |            |           |            |       |            |            |           |            |     |            |            |           |           |    |          |                            |  |  |  |  |       |    |            |    |           |       |    |            |    |           |       |    |           |    |            |     |    |         |    |           |                           |  |  |  |  |       |    |   |    |         |       |    |         |    |         |       |    |         |    |         |     |    |         |    |         |                                                                                                                                                                                                                                                                                                                                                                                                                                                                                                                                                                                                                                                                                                                                                                                                                                                                                                                                                                                            |  |  |  |  |                         |                      |                |              |  |  |  |       |           |          |            |       |            |         |            |       |            |         |            |     |         |         |          |                |  |  |  |       |           |   |            |       |            |          |            |       |            |         |            |     |         |   |          |
| 45-59                      | 22                                                                                                                                                                                                                                                                                                                                                                                                                                                                                                                                                                                                                                                                                                                                                                                                                                                                                                                                                                                                                                                                                                                                                                                                                                                                                                                                                                                                                                                                                                                                                                                                                                 | 2 (1-2)              | 27             | 3 (1-5)    |  |         |                    |  |        |        |        |           |          |          |         |                    |  |                  |  |  |       |            |            |           |            |       |            |            |           |            |       |            |            |           |            |     |            |            |           |           |    |          |                            |  |  |  |  |       |    |            |    |           |       |    |            |    |           |       |    |           |    |            |     |    |         |    |           |                           |  |  |  |  |       |    |   |    |         |       |    |         |    |         |       |    |         |    |         |     |    |         |    |         |                                                                                                                                                                                                                                                                                                                                                                                                                                                                                                                                                                                                                                                                                                                                                                                                                                                                                                                                                                                            |  |  |  |  |                         |                      |                |              |  |  |  |       |           |          |            |       |            |         |            |       |            |         |            |     |         |         |          |                |  |  |  |       |           |   |            |       |            |          |            |       |            |         |            |     |         |   |          |
| 60-74                      | 20                                                                                                                                                                                                                                                                                                                                                                                                                                                                                                                                                                                                                                                                                                                                                                                                                                                                                                                                                                                                                                                                                                                                                                                                                                                                                                                                                                                                                                                                                                                                                                                                                                 | 1 (1-1)              | 25             | 3 (1-4)    |  |         |                    |  |        |        |        |           |          |          |         |                    |  |                  |  |  |       |            |            |           |            |       |            |            |           |            |       |            |            |           |            |     |            |            |           |           |    |          |                            |  |  |  |  |       |    |            |    |           |       |    |            |    |           |       |    |           |    |            |     |    |         |    |           |                           |  |  |  |  |       |    |   |    |         |       |    |         |    |         |       |    |         |    |         |     |    |         |    |         |                                                                                                                                                                                                                                                                                                                                                                                                                                                                                                                                                                                                                                                                                                                                                                                                                                                                                                                                                                                            |  |  |  |  |                         |                      |                |              |  |  |  |       |           |          |            |       |            |         |            |       |            |         |            |     |         |         |          |                |  |  |  |       |           |   |            |       |            |          |            |       |            |         |            |     |         |   |          |
| ≥75                        | 15                                                                                                                                                                                                                                                                                                                                                                                                                                                                                                                                                                                                                                                                                                                                                                                                                                                                                                                                                                                                                                                                                                                                                                                                                                                                                                                                                                                                                                                                                                                                                                                                                                 | 1 (0-1)              | 13             | 1 (0-2)    |  |         |                    |  |        |        |        |           |          |          |         |                    |  |                  |  |  |       |            |            |           |            |       |            |            |           |            |       |            |            |           |            |     |            |            |           |           |    |          |                            |  |  |  |  |       |    |            |    |           |       |    |            |    |           |       |    |           |    |            |     |    |         |    |           |                           |  |  |  |  |       |    |   |    |         |       |    |         |    |         |       |    |         |    |         |     |    |         |    |         |                                                                                                                                                                                                                                                                                                                                                                                                                                                                                                                                                                                                                                                                                                                                                                                                                                                                                                                                                                                            |  |  |  |  |                         |                      |                |              |  |  |  |       |           |          |            |       |            |         |            |       |            |         |            |     |         |         |          |                |  |  |  |       |           |   |            |       |            |          |            |       |            |         |            |     |         |   |          |
|                            | Squamous cell carcinoma                                                                                                                                                                                                                                                                                                                                                                                                                                                                                                                                                                                                                                                                                                                                                                                                                                                                                                                                                                                                                                                                                                                                                                                                                                                                                                                                                                                                                                                                                                                                                                                                            | Small cell carcinoma | Adenocarcinoma |            |  |         |                    |  |        |        |        |           |          |          |         |                    |  |                  |  |  |       |            |            |           |            |       |            |            |           |            |       |            |            |           |            |     |            |            |           |           |    |          |                            |  |  |  |  |       |    |            |    |           |       |    |            |    |           |       |    |           |    |            |     |    |         |    |           |                           |  |  |  |  |       |    |   |    |         |       |    |         |    |         |       |    |         |    |         |     |    |         |    |         |                                                                                                                                                                                                                                                                                                                                                                                                                                                                                                                                                                                                                                                                                                                                                                                                                                                                                                                                                                                            |  |  |  |  |                         |                      |                |              |  |  |  |       |           |          |            |       |            |         |            |       |            |         |            |     |         |         |          |                |  |  |  |       |           |   |            |       |            |          |            |       |            |         |            |     |         |   |          |
| <b>Males</b>               |                                                                                                                                                                                                                                                                                                                                                                                                                                                                                                                                                                                                                                                                                                                                                                                                                                                                                                                                                                                                                                                                                                                                                                                                                                                                                                                                                                                                                                                                                                                                                                                                                                    |                      |                |            |  |         |                    |  |        |        |        |           |          |          |         |                    |  |                  |  |  |       |            |            |           |            |       |            |            |           |            |       |            |            |           |            |     |            |            |           |           |    |          |                            |  |  |  |  |       |    |            |    |           |       |    |            |    |           |       |    |           |    |            |     |    |         |    |           |                           |  |  |  |  |       |    |   |    |         |       |    |         |    |         |       |    |         |    |         |     |    |         |    |         |                                                                                                                                                                                                                                                                                                                                                                                                                                                                                                                                                                                                                                                                                                                                                                                                                                                                                                                                                                                            |  |  |  |  |                         |                      |                |              |  |  |  |       |           |          |            |       |            |         |            |       |            |         |            |     |         |         |          |                |  |  |  |       |           |   |            |       |            |          |            |       |            |         |            |     |         |   |          |
| 30-44                      | 19 (8-30)                                                                                                                                                                                                                                                                                                                                                                                                                                                                                                                                                                                                                                                                                                                                                                                                                                                                                                                                                                                                                                                                                                                                                                                                                                                                                                                                                                                                                                                                                                                                                                                                                          | 6 (0-13)             | 29 (20-39)     |            |  |         |                    |  |        |        |        |           |          |          |         |                    |  |                  |  |  |       |            |            |           |            |       |            |            |           |            |       |            |            |           |            |     |            |            |           |           |    |          |                            |  |  |  |  |       |    |            |    |           |       |    |            |    |           |       |    |           |    |            |     |    |         |    |           |                           |  |  |  |  |       |    |   |    |         |       |    |         |    |         |       |    |         |    |         |     |    |         |    |         |                                                                                                                                                                                                                                                                                                                                                                                                                                                                                                                                                                                                                                                                                                                                                                                                                                                                                                                                                                                            |  |  |  |  |                         |                      |                |              |  |  |  |       |           |          |            |       |            |         |            |       |            |         |            |     |         |         |          |                |  |  |  |       |           |   |            |       |            |          |            |       |            |         |            |     |         |   |          |
| 45-59                      | 20 (17-23)                                                                                                                                                                                                                                                                                                                                                                                                                                                                                                                                                                                                                                                                                                                                                                                                                                                                                                                                                                                                                                                                                                                                                                                                                                                                                                                                                                                                                                                                                                                                                                                                                         | 4 (2-6)              | 19 (15-23)     |            |  |         |                    |  |        |        |        |           |          |          |         |                    |  |                  |  |  |       |            |            |           |            |       |            |            |           |            |       |            |            |           |            |     |            |            |           |           |    |          |                            |  |  |  |  |       |    |            |    |           |       |    |            |    |           |       |    |           |    |            |     |    |         |    |           |                           |  |  |  |  |       |    |   |    |         |       |    |         |    |         |       |    |         |    |         |     |    |         |    |         |                                                                                                                                                                                                                                                                                                                                                                                                                                                                                                                                                                                                                                                                                                                                                                                                                                                                                                                                                                                            |  |  |  |  |                         |                      |                |              |  |  |  |       |           |          |            |       |            |         |            |       |            |         |            |     |         |         |          |                |  |  |  |       |           |   |            |       |            |          |            |       |            |         |            |     |         |   |          |
| 60-74                      | 17 (16-19)                                                                                                                                                                                                                                                                                                                                                                                                                                                                                                                                                                                                                                                                                                                                                                                                                                                                                                                                                                                                                                                                                                                                                                                                                                                                                                                                                                                                                                                                                                                                                                                                                         | 3 (2-4)              | 15 (13-18)     |            |  |         |                    |  |        |        |        |           |          |          |         |                    |  |                  |  |  |       |            |            |           |            |       |            |            |           |            |       |            |            |           |            |     |            |            |           |           |    |          |                            |  |  |  |  |       |    |            |    |           |       |    |            |    |           |       |    |           |    |            |     |    |         |    |           |                           |  |  |  |  |       |    |   |    |         |       |    |         |    |         |       |    |         |    |         |     |    |         |    |         |                                                                                                                                                                                                                                                                                                                                                                                                                                                                                                                                                                                                                                                                                                                                                                                                                                                                                                                                                                                            |  |  |  |  |                         |                      |                |              |  |  |  |       |           |          |            |       |            |         |            |       |            |         |            |     |         |         |          |                |  |  |  |       |           |   |            |       |            |          |            |       |            |         |            |     |         |   |          |
| ≥75                        | 6 (4-8)                                                                                                                                                                                                                                                                                                                                                                                                                                                                                                                                                                                                                                                                                                                                                                                                                                                                                                                                                                                                                                                                                                                                                                                                                                                                                                                                                                                                                                                                                                                                                                                                                            | 3 (1-5)              | 6 (2-10)       |            |  |         |                    |  |        |        |        |           |          |          |         |                    |  |                  |  |  |       |            |            |           |            |       |            |            |           |            |       |            |            |           |            |     |            |            |           |           |    |          |                            |  |  |  |  |       |    |            |    |           |       |    |            |    |           |       |    |           |    |            |     |    |         |    |           |                           |  |  |  |  |       |    |   |    |         |       |    |         |    |         |       |    |         |    |         |     |    |         |    |         |                                                                                                                                                                                                                                                                                                                                                                                                                                                                                                                                                                                                                                                                                                                                                                                                                                                                                                                                                                                            |  |  |  |  |                         |                      |                |              |  |  |  |       |           |          |            |       |            |         |            |       |            |         |            |     |         |         |          |                |  |  |  |       |           |   |            |       |            |          |            |       |            |         |            |     |         |   |          |
| <b>Females</b>             |                                                                                                                                                                                                                                                                                                                                                                                                                                                                                                                                                                                                                                                                                                                                                                                                                                                                                                                                                                                                                                                                                                                                                                                                                                                                                                                                                                                                                                                                                                                                                                                                                                    |                      |                |            |  |         |                    |  |        |        |        |           |          |          |         |                    |  |                  |  |  |       |            |            |           |            |       |            |            |           |            |       |            |            |           |            |     |            |            |           |           |    |          |                            |  |  |  |  |       |    |            |    |           |       |    |            |    |           |       |    |           |    |            |     |    |         |    |           |                           |  |  |  |  |       |    |   |    |         |       |    |         |    |         |       |    |         |    |         |     |    |         |    |         |                                                                                                                                                                                                                                                                                                                                                                                                                                                                                                                                                                                                                                                                                                                                                                                                                                                                                                                                                                                            |  |  |  |  |                         |                      |                |              |  |  |  |       |           |          |            |       |            |         |            |       |            |         |            |     |         |         |          |                |  |  |  |       |           |   |            |       |            |          |            |       |            |         |            |     |         |   |          |
| 30-44                      | 18 (2-33)                                                                                                                                                                                                                                                                                                                                                                                                                                                                                                                                                                                                                                                                                                                                                                                                                                                                                                                                                                                                                                                                                                                                                                                                                                                                                                                                                                                                                                                                                                                                                                                                                          | ·                    | 37 (24-50)     |            |  |         |                    |  |        |        |        |           |          |          |         |                    |  |                  |  |  |       |            |            |           |            |       |            |            |           |            |       |            |            |           |            |     |            |            |           |           |    |          |                            |  |  |  |  |       |    |            |    |           |       |    |            |    |           |       |    |           |    |            |     |    |         |    |           |                           |  |  |  |  |       |    |   |    |         |       |    |         |    |         |       |    |         |    |         |     |    |         |    |         |                                                                                                                                                                                                                                                                                                                                                                                                                                                                                                                                                                                                                                                                                                                                                                                                                                                                                                                                                                                            |  |  |  |  |                         |                      |                |              |  |  |  |       |           |          |            |       |            |         |            |       |            |         |            |     |         |         |          |                |  |  |  |       |           |   |            |       |            |          |            |       |            |         |            |     |         |   |          |
| 45-59                      | 19 (11-27)                                                                                                                                                                                                                                                                                                                                                                                                                                                                                                                                                                                                                                                                                                                                                                                                                                                                                                                                                                                                                                                                                                                                                                                                                                                                                                                                                                                                                                                                                                                                                                                                                         | 9 (4-15)             | 26 (19-32)     |            |  |         |                    |  |        |        |        |           |          |          |         |                    |  |                  |  |  |       |            |            |           |            |       |            |            |           |            |       |            |            |           |            |     |            |            |           |           |    |          |                            |  |  |  |  |       |    |            |    |           |       |    |            |    |           |       |    |           |    |            |     |    |         |    |           |                           |  |  |  |  |       |    |   |    |         |       |    |         |    |         |       |    |         |    |         |     |    |         |    |         |                                                                                                                                                                                                                                                                                                                                                                                                                                                                                                                                                                                                                                                                                                                                                                                                                                                                                                                                                                                            |  |  |  |  |                         |                      |                |              |  |  |  |       |           |          |            |       |            |         |            |       |            |         |            |     |         |         |          |                |  |  |  |       |           |   |            |       |            |          |            |       |            |         |            |     |         |   |          |
| 60-74                      | 18 (13-23)                                                                                                                                                                                                                                                                                                                                                                                                                                                                                                                                                                                                                                                                                                                                                                                                                                                                                                                                                                                                                                                                                                                                                                                                                                                                                                                                                                                                                                                                                                                                                                                                                         | 4 (1-6)              | 26 (21-30)     |            |  |         |                    |  |        |        |        |           |          |          |         |                    |  |                  |  |  |       |            |            |           |            |       |            |            |           |            |       |            |            |           |            |     |            |            |           |           |    |          |                            |  |  |  |  |       |    |            |    |           |       |    |            |    |           |       |    |           |    |            |     |    |         |    |           |                           |  |  |  |  |       |    |   |    |         |       |    |         |    |         |       |    |         |    |         |     |    |         |    |         |                                                                                                                                                                                                                                                                                                                                                                                                                                                                                                                                                                                                                                                                                                                                                                                                                                                                                                                                                                                            |  |  |  |  |                         |                      |                |              |  |  |  |       |           |          |            |       |            |         |            |       |            |         |            |     |         |         |          |                |  |  |  |       |           |   |            |       |            |          |            |       |            |         |            |     |         |   |          |
| ≥75                        | 5 (0-9)                                                                                                                                                                                                                                                                                                                                                                                                                                                                                                                                                                                                                                                                                                                                                                                                                                                                                                                                                                                                                                                                                                                                                                                                                                                                                                                                                                                                                                                                                                                                                                                                                            | ·                    | 7 (2-12)       |            |  |         |                    |  |        |        |        |           |          |          |         |                    |  |                  |  |  |       |            |            |           |            |       |            |            |           |            |       |            |            |           |            |     |            |            |           |           |    |          |                            |  |  |  |  |       |    |            |    |           |       |    |            |    |           |       |    |           |    |            |     |    |         |    |           |                           |  |  |  |  |       |    |   |    |         |       |    |         |    |         |       |    |         |    |         |     |    |         |    |         |                                                                                                                                                                                                                                                                                                                                                                                                                                                                                                                                                                                                                                                                                                                                                                                                                                                                                                                                                                                            |  |  |  |  |                         |                      |                |              |  |  |  |       |           |          |            |       |            |         |            |       |            |         |            |     |         |         |          |                |  |  |  |       |           |   |            |       |            |          |            |       |            |         |            |     |         |   |          |
| Jung et al., 2013          | <b>5-year relative survival</b><br><hr/> <table border="0"> <thead> <tr> <th></th> <th colspan="4">Stage at diagnosis</th> </tr> <tr> <th></th> <th>Localized</th> <th>Regional</th> <th>Distant</th> <th>Unknown</th> </tr> </thead> <tbody> <tr> <td colspan="5"><b>Age (years)</b></td> </tr> <tr> <td>20-49</td> <td>76.6 (1.8)</td> <td>48.0 (1.9)</td> <td>8.9 (0.8)</td> <td>30.7 (2.3)</td> </tr> <tr> <td>50-64</td> <td>64.4 (0.9)</td> <td>37.3 (0.8)</td> <td>6.8 (0.4)</td> <td>25.6 (1.0)</td> </tr> <tr> <td>65-74</td> <td>41.4 (1.0)</td> <td>24.0 (0.7)</td> <td>3.8 (0.3)</td> <td>15.1 (0.7)</td> </tr> <tr> <td>≥75</td> <td>20.5 (1.2)</td> <td>12.4 (0.8)</td> <td>2.6 (0.3)</td> <td>8.8 (0.6)</td> </tr> </tbody> </table>                                                                                                                                                                                                                                                                                                                                                                                                                                                                                                                                                                                                                                                                                                                                                                                                                                                                                |                      |                |            |  |         | Stage at diagnosis |  |        |        |        | Localized | Regional | Distant  | Unknown | <b>Age (years)</b> |  |                  |  |  | 20-49 | 76.6 (1.8) | 48.0 (1.9) | 8.9 (0.8) | 30.7 (2.3) | 50-64 | 64.4 (0.9) | 37.3 (0.8) | 6.8 (0.4) | 25.6 (1.0) | 65-74 | 41.4 (1.0) | 24.0 (0.7) | 3.8 (0.3) | 15.1 (0.7) | ≥75 | 20.5 (1.2) | 12.4 (0.8) | 2.6 (0.3) | 8.8 (0.6) |    |          |                            |  |  |  |  |       |    |            |    |           |       |    |            |    |           |       |    |           |    |            |     |    |         |    |           |                           |  |  |  |  |       |    |   |    |         |       |    |         |    |         |       |    |         |    |         |     |    |         |    |         |                                                                                                                                                                                                                                                                                                                                                                                                                                                                                                                                                                                                                                                                                                                                                                                                                                                                                                                                                                                            |  |  |  |  |                         |                      |                |              |  |  |  |       |           |          |            |       |            |         |            |       |            |         |            |     |         |         |          |                |  |  |  |       |           |   |            |       |            |          |            |       |            |         |            |     |         |   |          |
|                            | Stage at diagnosis                                                                                                                                                                                                                                                                                                                                                                                                                                                                                                                                                                                                                                                                                                                                                                                                                                                                                                                                                                                                                                                                                                                                                                                                                                                                                                                                                                                                                                                                                                                                                                                                                 |                      |                |            |  |         |                    |  |        |        |        |           |          |          |         |                    |  |                  |  |  |       |            |            |           |            |       |            |            |           |            |       |            |            |           |            |     |            |            |           |           |    |          |                            |  |  |  |  |       |    |            |    |           |       |    |            |    |           |       |    |           |    |            |     |    |         |    |           |                           |  |  |  |  |       |    |   |    |         |       |    |         |    |         |       |    |         |    |         |     |    |         |    |         |                                                                                                                                                                                                                                                                                                                                                                                                                                                                                                                                                                                                                                                                                                                                                                                                                                                                                                                                                                                            |  |  |  |  |                         |                      |                |              |  |  |  |       |           |          |            |       |            |         |            |       |            |         |            |     |         |         |          |                |  |  |  |       |           |   |            |       |            |          |            |       |            |         |            |     |         |   |          |
|                            | Localized                                                                                                                                                                                                                                                                                                                                                                                                                                                                                                                                                                                                                                                                                                                                                                                                                                                                                                                                                                                                                                                                                                                                                                                                                                                                                                                                                                                                                                                                                                                                                                                                                          | Regional             | Distant        | Unknown    |  |         |                    |  |        |        |        |           |          |          |         |                    |  |                  |  |  |       |            |            |           |            |       |            |            |           |            |       |            |            |           |            |     |            |            |           |           |    |          |                            |  |  |  |  |       |    |            |    |           |       |    |            |    |           |       |    |           |    |            |     |    |         |    |           |                           |  |  |  |  |       |    |   |    |         |       |    |         |    |         |       |    |         |    |         |     |    |         |    |         |                                                                                                                                                                                                                                                                                                                                                                                                                                                                                                                                                                                                                                                                                                                                                                                                                                                                                                                                                                                            |  |  |  |  |                         |                      |                |              |  |  |  |       |           |          |            |       |            |         |            |       |            |         |            |     |         |         |          |                |  |  |  |       |           |   |            |       |            |          |            |       |            |         |            |     |         |   |          |
| <b>Age (years)</b>         |                                                                                                                                                                                                                                                                                                                                                                                                                                                                                                                                                                                                                                                                                                                                                                                                                                                                                                                                                                                                                                                                                                                                                                                                                                                                                                                                                                                                                                                                                                                                                                                                                                    |                      |                |            |  |         |                    |  |        |        |        |           |          |          |         |                    |  |                  |  |  |       |            |            |           |            |       |            |            |           |            |       |            |            |           |            |     |            |            |           |           |    |          |                            |  |  |  |  |       |    |            |    |           |       |    |            |    |           |       |    |           |    |            |     |    |         |    |           |                           |  |  |  |  |       |    |   |    |         |       |    |         |    |         |       |    |         |    |         |     |    |         |    |         |                                                                                                                                                                                                                                                                                                                                                                                                                                                                                                                                                                                                                                                                                                                                                                                                                                                                                                                                                                                            |  |  |  |  |                         |                      |                |              |  |  |  |       |           |          |            |       |            |         |            |       |            |         |            |     |         |         |          |                |  |  |  |       |           |   |            |       |            |          |            |       |            |         |            |     |         |   |          |
| 20-49                      | 76.6 (1.8)                                                                                                                                                                                                                                                                                                                                                                                                                                                                                                                                                                                                                                                                                                                                                                                                                                                                                                                                                                                                                                                                                                                                                                                                                                                                                                                                                                                                                                                                                                                                                                                                                         | 48.0 (1.9)           | 8.9 (0.8)      | 30.7 (2.3) |  |         |                    |  |        |        |        |           |          |          |         |                    |  |                  |  |  |       |            |            |           |            |       |            |            |           |            |       |            |            |           |            |     |            |            |           |           |    |          |                            |  |  |  |  |       |    |            |    |           |       |    |            |    |           |       |    |           |    |            |     |    |         |    |           |                           |  |  |  |  |       |    |   |    |         |       |    |         |    |         |       |    |         |    |         |     |    |         |    |         |                                                                                                                                                                                                                                                                                                                                                                                                                                                                                                                                                                                                                                                                                                                                                                                                                                                                                                                                                                                            |  |  |  |  |                         |                      |                |              |  |  |  |       |           |          |            |       |            |         |            |       |            |         |            |     |         |         |          |                |  |  |  |       |           |   |            |       |            |          |            |       |            |         |            |     |         |   |          |
| 50-64                      | 64.4 (0.9)                                                                                                                                                                                                                                                                                                                                                                                                                                                                                                                                                                                                                                                                                                                                                                                                                                                                                                                                                                                                                                                                                                                                                                                                                                                                                                                                                                                                                                                                                                                                                                                                                         | 37.3 (0.8)           | 6.8 (0.4)      | 25.6 (1.0) |  |         |                    |  |        |        |        |           |          |          |         |                    |  |                  |  |  |       |            |            |           |            |       |            |            |           |            |       |            |            |           |            |     |            |            |           |           |    |          |                            |  |  |  |  |       |    |            |    |           |       |    |            |    |           |       |    |           |    |            |     |    |         |    |           |                           |  |  |  |  |       |    |   |    |         |       |    |         |    |         |       |    |         |    |         |     |    |         |    |         |                                                                                                                                                                                                                                                                                                                                                                                                                                                                                                                                                                                                                                                                                                                                                                                                                                                                                                                                                                                            |  |  |  |  |                         |                      |                |              |  |  |  |       |           |          |            |       |            |         |            |       |            |         |            |     |         |         |          |                |  |  |  |       |           |   |            |       |            |          |            |       |            |         |            |     |         |   |          |
| 65-74                      | 41.4 (1.0)                                                                                                                                                                                                                                                                                                                                                                                                                                                                                                                                                                                                                                                                                                                                                                                                                                                                                                                                                                                                                                                                                                                                                                                                                                                                                                                                                                                                                                                                                                                                                                                                                         | 24.0 (0.7)           | 3.8 (0.3)      | 15.1 (0.7) |  |         |                    |  |        |        |        |           |          |          |         |                    |  |                  |  |  |       |            |            |           |            |       |            |            |           |            |       |            |            |           |            |     |            |            |           |           |    |          |                            |  |  |  |  |       |    |            |    |           |       |    |            |    |           |       |    |           |    |            |     |    |         |    |           |                           |  |  |  |  |       |    |   |    |         |       |    |         |    |         |       |    |         |    |         |     |    |         |    |         |                                                                                                                                                                                                                                                                                                                                                                                                                                                                                                                                                                                                                                                                                                                                                                                                                                                                                                                                                                                            |  |  |  |  |                         |                      |                |              |  |  |  |       |           |          |            |       |            |         |            |       |            |         |            |     |         |         |          |                |  |  |  |       |           |   |            |       |            |          |            |       |            |         |            |     |         |   |          |
| ≥75                        | 20.5 (1.2)                                                                                                                                                                                                                                                                                                                                                                                                                                                                                                                                                                                                                                                                                                                                                                                                                                                                                                                                                                                                                                                                                                                                                                                                                                                                                                                                                                                                                                                                                                                                                                                                                         | 12.4 (0.8)           | 2.6 (0.3)      | 8.8 (0.6)  |  |         |                    |  |        |        |        |           |          |          |         |                    |  |                  |  |  |       |            |            |           |            |       |            |            |           |            |       |            |            |           |            |     |            |            |           |           |    |          |                            |  |  |  |  |       |    |            |    |           |       |    |            |    |           |       |    |           |    |            |     |    |         |    |           |                           |  |  |  |  |       |    |   |    |         |       |    |         |    |         |       |    |         |    |         |     |    |         |    |         |                                                                                                                                                                                                                                                                                                                                                                                                                                                                                                                                                                                                                                                                                                                                                                                                                                                                                                                                                                                            |  |  |  |  |                         |                      |                |              |  |  |  |       |           |          |            |       |            |         |            |       |            |         |            |     |         |         |          |                |  |  |  |       |           |   |            |       |            |          |            |       |            |         |            |     |         |   |          |

| First author, date    | Results                                     |                |                |                |              |                |                |                |                |              |              |              |
|-----------------------|---------------------------------------------|----------------|----------------|----------------|--------------|----------------|----------------|----------------|----------------|--------------|--------------|--------------|
|                       | 5-year relative survival (% - 95%CI) in Men |                |                |                |              | Women          |                |                |                |              |              |              |
|                       | 20-44<br>years                              | 45-54<br>years | 55-64<br>years | 65-74<br>years | 75+ years    | 20-44<br>years | 45-54<br>years | 55-64<br>years | 65-74<br>years | 75+ years    |              |              |
| Mariotto et al., 2014 | All Stages                                  | 19 (17-20)     | 15 (14-16)     | 16 (15-16)     | 15 (15-16)   | 11 (10-11)     | All Stages     | 24 (22 - 26)   | 22 (21 - 23)   | 22 (21 - 22) | 20 (20 - 21) | 13 (13 - 14) |
|                       | Small Cell                                  | 10 (6 -15)     | 7 (6 - 9)      | 5 (5 - 6)      | 5 (4 - 6)    | 3 (2 - 4)      | Small Cell     | 10 (6 -15)     | 11 (9 -13)     | 11 (10 -12)  | 7 (6 - 8)    | 4 (3 - 5)    |
|                       | Non-Small Cell                              | 20 (18 - 22)   | 16 (15 -17)    | 18 (17 - 18)   | 17 (16 -17)  | 11 (11 -12)    | Non-Small Cell | 26 (24 - 28)   | 24 (23 - 25)   | 24 (23 - 25) | 23 (22 - 24) | 14 (14 - 15) |
|                       | Stage 1                                     | 81 (73 - 86)   | 61 (57 - 64)   | 58 (56 - 60)   | 53 (52 - 55) | 42 (39 - 44)   | Stage 1        | 80 (73 - 85)   | 72 (69 - 75)   | 68 (66 - 70) | 62 (60 - 64) | 50 (48 - 52) |
|                       | Small Cell                                  | 86 (33 - 98)   | 25 (10 - 43)   | 20 (12 - 30)   | 33 (24 - 41) | 13 (6 - 21)    | Small Cell     | 63 (14 - 90)   | 36 (22 - 49)   | 36 (27 - 45) | 35 (27 - 44) | 18 (11 - 27) |
|                       | Non-Small Cell                              | 81 (73 - 86)   | 62 (59 - 66)   | 60 (57 - 62)   | 54 (52 - 56) | 43 (40 - 45)   | Non-Small Cell | 80 (74 - 86)   | 74 (71 - 77)   | 70 (68 - 72) | 63 (61 - 65) | 51 (49 - 53) |
|                       | Stage II                                    | 47 (34 - 59)   | 41 (36 - 47)   | 39 (36 - 43)   | 33 (30 - 36) | 22 (18-25)     | Stage II       | 64 (51 - 74)   | 48 (42 - 54)   | 44 (39 - 48) | 35 (31 - 38) | 22 (19 - 26) |
|                       | Small Cell                                  | 34 (5 - 68)    | 23 (9 - 41)    | 23 (12 - 36)   | 18 (8 - 32)  |                | Small Cell     | 54 (7 - 87)    | 28 (11 - 47)   | 29 (19 - 40) | 25 (14 - 37) | 10 (4 - 20)  |
|                       | Non-Small Cell                              | 48 (35 - 60)   | 43 (37 - 48)   | 40 (37 - 44)   | 33 (30 - 36) | 22 (19 - 26)   | Non-Small Cell | 64 (51 - 75)   | 50 (44 - 56)   | 45 (41 - 50) | 35 (32 - 39) | 23 (20 - 27) |
|                       | Stage III                                   | 17 (13-21)     | 17 (15 -18)    | 16 (15 -17)    | 12 (11 -13)  | 7 (7 - 8)      | Stage III      | 25 (20 - 30)   | 24 (22 - 26)   | 21 (19 - 22) | 15 (14 - 16) | 9 (8 - 10)   |
|                       | Small Cell                                  | 15 (7 - 25)    | 15 (11 -19)    | 11 (9 -13)     | 8 (6 -11)    | 4 (3 - 6)      | Small Cell     | 12 (4 - 24)    | 19 (15 - 24)   | 20 (17 - 22) | 10 (8 -12)   | 6 (4 - 9)    |
|                       | Non-Small Cell                              | 18 (14 - 22)   | 17 (15 -19)    | 17 (16 -18)    | 13 (12 -14)  | 8 (7 - 9)      | Non-Small Cell | 27 (22 - 32)   | 25 (23 - 28)   | 21 (19 - 23) | 17 (15 -18)  | 9 (8 - 10)   |
|                       | Stage IV                                    | 6 (5 - 8)      | 4 (3 - 4)      | 3 (2 - 3)      | 2 (2 - 3)    | 2 (1 - 2)      | Stage IV       | 8 (6 -10)      | 5 (5 - 6)      | 4 (4 - 5)    | 4 (4 - 4)    | 3 (2 - 3)    |
|                       | Small Cell                                  | 3 (1 - 7)      | 3 (2 - 4)      | 2 (1 - 2)      | 1 (1 - 2)    | 1 (0 -1)       | Small Cell     | 6 (3 -11)      | 3 (2 - 5)      | 3 (3 - 4)    | 2 (1 - 3)    | 1 (1 - 2)    |
|                       | Non-Small Cell                              | 7 (5 - 9)      | 4 (3 - 4)      | 3 (3 - 3)      | 3 (2 - 3)    | 2 (2 - 2)      | Non-Small Cell | 8 (6 -10)      | 6 (5 - 7)      | 5 (4 - 5)    | 5 (4 - 5)    | 3 (2 - 3)    |

| First author, date   | Results                   |                  |                      |                |                  |                      |              |                  |                      |   |
|----------------------|---------------------------|------------------|----------------------|----------------|------------------|----------------------|--------------|------------------|----------------------|---|
|                      | 5-year crude survival (%) |                  |                      |                |                  |                      |              |                  |                      |   |
|                      | Localized stage           |                  |                      | Regional stage |                  |                      |              | Distant stage    |                      |   |
|                      | All patients              | No comorbidities | Severe comorbidities | All patients   | No comorbidities | Severe comorbidities | All patients | No comorbidities | Severe comorbidities |   |
|                      | Men                       |                  |                      |                |                  |                      |              |                  |                      |   |
|                      | 20-44                     | 83               | -                    | -              | 34               | -                    | -            | 7                | -                    | - |
|                      | 45-54                     | 57               | -                    | -              | 26               | -                    | -            | 4                | -                    | - |
|                      | 55-65                     | 51               | -                    | -              | 25               | -                    | -            | 3                | -                    | - |
|                      | 66-74                     | 40               | 49                   | 29             | 19               | 21                   | 14           | 2                | 3                    | 2 |
|                      | 75-84                     | 26               | 33                   | 20             | 12               | 15                   | 8            | 1                | 2                    | 1 |
|                      | 85+                       | 13               | 16                   | 10             | 4                | 4                    | 3            | 1                | 1                    | 1 |
|                      | Women                     |                  |                      |                |                  |                      |              |                  |                      |   |
|                      | 20-44                     | 82               | -                    | -              | 42               | -                    | -            | 8                | -                    | - |
|                      | 45-54                     | 74               | -                    | -              | 35               | -                    | -            | 7                | -                    | - |
|                      | 55-65                     | 63               | -                    | -              | 31               | -                    | -            | 5                | -                    | - |
| 66-74                | 52                        | 63               | 38                   | 24             | 30               | 18                   | 4            | 4                | 2                    |   |
| 75-84                | 36                        | 47               | 27                   | 16             | 22               | 11                   | 2            | 3                | 2                    |   |
| 85+                  | 13                        | 18               | 11                   | 7              | 9                | 5                    | 1            | 2                | 0                    |   |
| Elberle et al., 2015 | 5-year relative survival  |                  |                      |                |                  |                      |              |                  |                      |   |
| Male                 |                           | Female           |                      |                |                  |                      |              |                  |                      |   |
| Age (years)          |                           |                  |                      |                |                  |                      |              |                  |                      |   |
| 15-59                | 18.5 (0.4)                | 23.7 (0.6)       |                      |                |                  |                      |              |                  |                      |   |
| 60-69                | 17.0 (0.3)                | 22.9 (0.6)       |                      |                |                  |                      |              |                  |                      |   |
| 70-79                | 13.8 (0.3)                | 19.0 (0.6)       |                      |                |                  |                      |              |                  |                      |   |
| ≥80                  | 8.4 (0.6)                 | 10.6 (0.8)       |                      |                |                  |                      |              |                  |                      |   |



| First author, date                | Results                                                                                                                                                                                                                                                                                                                                                                                                                                                                                                                                                                                                                                                                                                                                                                                                                                                                                                                                                                             |                  |                    |                  |                     |  |  |       |                  |                  |       |                  |                  |       |                  |                  |       |                  |                  |                     |     |       |       |                  |                  |       |                  |               |       |                  |               |       |                 |               |
|-----------------------------------|-------------------------------------------------------------------------------------------------------------------------------------------------------------------------------------------------------------------------------------------------------------------------------------------------------------------------------------------------------------------------------------------------------------------------------------------------------------------------------------------------------------------------------------------------------------------------------------------------------------------------------------------------------------------------------------------------------------------------------------------------------------------------------------------------------------------------------------------------------------------------------------------------------------------------------------------------------------------------------------|------------------|--------------------|------------------|---------------------|--|--|-------|------------------|------------------|-------|------------------|------------------|-------|------------------|------------------|-------|------------------|------------------|---------------------|-----|-------|-------|------------------|------------------|-------|------------------|---------------|-------|------------------|---------------|-------|-----------------|---------------|
| Maringe et al., 2015              | <p><b>Net survival in men (% - 95% CI)</b></p> <table border="1"> <thead> <tr> <th></th> <th>South Asians</th> <th>Non-South Asians</th> </tr> </thead> <tbody> <tr> <td colspan="3" style="text-align:center">1-year net survival</td> </tr> <tr> <td>15-44</td> <td>42.4 (30.0-54.9)</td> <td>36.5 (34.3-38.8)</td> </tr> <tr> <td>45-54</td> <td>39.5 (30.3-48.7)</td> <td>31.1 (30.1-32.0)</td> </tr> <tr> <td>55-64</td> <td>34.7 (29.7-39.6)</td> <td>29.4 (28.9-29.9)</td> </tr> <tr> <td>65-69</td> <td>28.9 (23.7-34.0)</td> <td>26.1 (25.5-26.6)</td> </tr> <tr> <td colspan="3" style="text-align:center">5-year net survival</td> </tr> <tr> <td>15-44</td> <td>27.3 (16.1-38.5)</td> <td>16.7 (14.9-18.5)</td> </tr> <tr> <td>45-54</td> <td>18.9 (11.4-26.4)</td> <td>8.9 (8.3-9.5)</td> </tr> <tr> <td>55-64</td> <td>14.1 (10.3-17.8)</td> <td>8.5 (8.2-8.9)</td> </tr> <tr> <td>65-69</td> <td>10.6 (6.9-14.4)</td> <td>7.2 (6.8-7.5)</td> </tr> </tbody> </table> |                  | South Asians       | Non-South Asians | 1-year net survival |  |  | 15-44 | 42.4 (30.0-54.9) | 36.5 (34.3-38.8) | 45-54 | 39.5 (30.3-48.7) | 31.1 (30.1-32.0) | 55-64 | 34.7 (29.7-39.6) | 29.4 (28.9-29.9) | 65-69 | 28.9 (23.7-34.0) | 26.1 (25.5-26.6) | 5-year net survival |     |       | 15-44 | 27.3 (16.1-38.5) | 16.7 (14.9-18.5) | 45-54 | 18.9 (11.4-26.4) | 8.9 (8.3-9.5) | 55-64 | 14.1 (10.3-17.8) | 8.5 (8.2-8.9) | 65-69 | 10.6 (6.9-14.4) | 7.2 (6.8-7.5) |
|                                   | South Asians                                                                                                                                                                                                                                                                                                                                                                                                                                                                                                                                                                                                                                                                                                                                                                                                                                                                                                                                                                        | Non-South Asians |                    |                  |                     |  |  |       |                  |                  |       |                  |                  |       |                  |                  |       |                  |                  |                     |     |       |       |                  |                  |       |                  |               |       |                  |               |       |                 |               |
| 1-year net survival               |                                                                                                                                                                                                                                                                                                                                                                                                                                                                                                                                                                                                                                                                                                                                                                                                                                                                                                                                                                                     |                  |                    |                  |                     |  |  |       |                  |                  |       |                  |                  |       |                  |                  |       |                  |                  |                     |     |       |       |                  |                  |       |                  |               |       |                  |               |       |                 |               |
| 15-44                             | 42.4 (30.0-54.9)                                                                                                                                                                                                                                                                                                                                                                                                                                                                                                                                                                                                                                                                                                                                                                                                                                                                                                                                                                    | 36.5 (34.3-38.8) |                    |                  |                     |  |  |       |                  |                  |       |                  |                  |       |                  |                  |       |                  |                  |                     |     |       |       |                  |                  |       |                  |               |       |                  |               |       |                 |               |
| 45-54                             | 39.5 (30.3-48.7)                                                                                                                                                                                                                                                                                                                                                                                                                                                                                                                                                                                                                                                                                                                                                                                                                                                                                                                                                                    | 31.1 (30.1-32.0) |                    |                  |                     |  |  |       |                  |                  |       |                  |                  |       |                  |                  |       |                  |                  |                     |     |       |       |                  |                  |       |                  |               |       |                  |               |       |                 |               |
| 55-64                             | 34.7 (29.7-39.6)                                                                                                                                                                                                                                                                                                                                                                                                                                                                                                                                                                                                                                                                                                                                                                                                                                                                                                                                                                    | 29.4 (28.9-29.9) |                    |                  |                     |  |  |       |                  |                  |       |                  |                  |       |                  |                  |       |                  |                  |                     |     |       |       |                  |                  |       |                  |               |       |                  |               |       |                 |               |
| 65-69                             | 28.9 (23.7-34.0)                                                                                                                                                                                                                                                                                                                                                                                                                                                                                                                                                                                                                                                                                                                                                                                                                                                                                                                                                                    | 26.1 (25.5-26.6) |                    |                  |                     |  |  |       |                  |                  |       |                  |                  |       |                  |                  |       |                  |                  |                     |     |       |       |                  |                  |       |                  |               |       |                  |               |       |                 |               |
| 5-year net survival               |                                                                                                                                                                                                                                                                                                                                                                                                                                                                                                                                                                                                                                                                                                                                                                                                                                                                                                                                                                                     |                  |                    |                  |                     |  |  |       |                  |                  |       |                  |                  |       |                  |                  |       |                  |                  |                     |     |       |       |                  |                  |       |                  |               |       |                  |               |       |                 |               |
| 15-44                             | 27.3 (16.1-38.5)                                                                                                                                                                                                                                                                                                                                                                                                                                                                                                                                                                                                                                                                                                                                                                                                                                                                                                                                                                    | 16.7 (14.9-18.5) |                    |                  |                     |  |  |       |                  |                  |       |                  |                  |       |                  |                  |       |                  |                  |                     |     |       |       |                  |                  |       |                  |               |       |                  |               |       |                 |               |
| 45-54                             | 18.9 (11.4-26.4)                                                                                                                                                                                                                                                                                                                                                                                                                                                                                                                                                                                                                                                                                                                                                                                                                                                                                                                                                                    | 8.9 (8.3-9.5)    |                    |                  |                     |  |  |       |                  |                  |       |                  |                  |       |                  |                  |       |                  |                  |                     |     |       |       |                  |                  |       |                  |               |       |                  |               |       |                 |               |
| 55-64                             | 14.1 (10.3-17.8)                                                                                                                                                                                                                                                                                                                                                                                                                                                                                                                                                                                                                                                                                                                                                                                                                                                                                                                                                                    | 8.5 (8.2-8.9)    |                    |                  |                     |  |  |       |                  |                  |       |                  |                  |       |                  |                  |       |                  |                  |                     |     |       |       |                  |                  |       |                  |               |       |                  |               |       |                 |               |
| 65-69                             | 10.6 (6.9-14.4)                                                                                                                                                                                                                                                                                                                                                                                                                                                                                                                                                                                                                                                                                                                                                                                                                                                                                                                                                                     | 7.2 (6.8-7.5)    |                    |                  |                     |  |  |       |                  |                  |       |                  |                  |       |                  |                  |       |                  |                  |                     |     |       |       |                  |                  |       |                  |               |       |                  |               |       |                 |               |
| Schulkes et al., 2017             | <p><b>% of patients alive after 1 year</b></p> <table border="1"> <thead> <tr> <th></th> <th colspan="4">Stage at diagnosis</th> </tr> <tr> <th></th> <th>I</th> <th>II</th> <th>III</th> <th>IV</th> </tr> </thead> <tbody> <tr> <td colspan="5">Age (years)</td> </tr> <tr> <td>18-70</td> <td>95%</td> <td>-</td> <td>?</td> <td>36%</td> </tr> <tr> <td>71-84</td> <td>89%</td> <td>-</td> <td>?</td> <td>36%</td> </tr> <tr> <td>≥85</td> <td>76%</td> <td>-</td> <td>78%</td> <td>46%</td> </tr> </tbody> </table>                                                                                                                                                                                                                                                                                                                                                                                                                                                            |                  | Stage at diagnosis |                  |                     |  |  | I     | II               | III              | IV    | Age (years)      |                  |       |                  |                  | 18-70 | 95%              | -                | ?                   | 36% | 71-84 | 89%   | -                | ?                | 36%   | ≥85              | 76%           | -     | 78%              | 46%           |       |                 |               |
|                                   | Stage at diagnosis                                                                                                                                                                                                                                                                                                                                                                                                                                                                                                                                                                                                                                                                                                                                                                                                                                                                                                                                                                  |                  |                    |                  |                     |  |  |       |                  |                  |       |                  |                  |       |                  |                  |       |                  |                  |                     |     |       |       |                  |                  |       |                  |               |       |                  |               |       |                 |               |
|                                   | I                                                                                                                                                                                                                                                                                                                                                                                                                                                                                                                                                                                                                                                                                                                                                                                                                                                                                                                                                                                   | II               | III                | IV               |                     |  |  |       |                  |                  |       |                  |                  |       |                  |                  |       |                  |                  |                     |     |       |       |                  |                  |       |                  |               |       |                  |               |       |                 |               |
| Age (years)                       |                                                                                                                                                                                                                                                                                                                                                                                                                                                                                                                                                                                                                                                                                                                                                                                                                                                                                                                                                                                     |                  |                    |                  |                     |  |  |       |                  |                  |       |                  |                  |       |                  |                  |       |                  |                  |                     |     |       |       |                  |                  |       |                  |               |       |                  |               |       |                 |               |
| 18-70                             | 95%                                                                                                                                                                                                                                                                                                                                                                                                                                                                                                                                                                                                                                                                                                                                                                                                                                                                                                                                                                                 | -                | ?                  | 36%              |                     |  |  |       |                  |                  |       |                  |                  |       |                  |                  |       |                  |                  |                     |     |       |       |                  |                  |       |                  |               |       |                  |               |       |                 |               |
| 71-84                             | 89%                                                                                                                                                                                                                                                                                                                                                                                                                                                                                                                                                                                                                                                                                                                                                                                                                                                                                                                                                                                 | -                | ?                  | 36%              |                     |  |  |       |                  |                  |       |                  |                  |       |                  |                  |       |                  |                  |                     |     |       |       |                  |                  |       |                  |               |       |                  |               |       |                 |               |
| ≥85                               | 76%                                                                                                                                                                                                                                                                                                                                                                                                                                                                                                                                                                                                                                                                                                                                                                                                                                                                                                                                                                                 | -                | 78%                | 46%              |                     |  |  |       |                  |                  |       |                  |                  |       |                  |                  |       |                  |                  |                     |     |       |       |                  |                  |       |                  |               |       |                  |               |       |                 |               |
| <b>Non-small cell lung cancer</b> |                                                                                                                                                                                                                                                                                                                                                                                                                                                                                                                                                                                                                                                                                                                                                                                                                                                                                                                                                                                     |                  |                    |                  |                     |  |  |       |                  |                  |       |                  |                  |       |                  |                  |       |                  |                  |                     |     |       |       |                  |                  |       |                  |               |       |                  |               |       |                 |               |

| First author, date                          | Results                                                                                                                                                                                                                                                                                                                                                                                                                                                                                                                                                                                                                                                                                                                                                                                                                                                                                                                                                                                                                                                                                                                                                                                                                                                                                                                                                                                                                                                                                                                                                                       |                  |                  |                  |         |    |         |     |     |       |       |     |                                           |       |    |    |   |       |                  |                  |                  |                  |         |                  |                  |                  |                  |                                             |   |   |   |                                                                                                                                                                                                                                                                                                                                                                                                                                                                                                                                                                                                                                                                                                                                                                                                                                                                                                                                                                                                                                                                                                                                                                                                                                                                                                                              |             |                  |                  |                  |                  |         |                  |                  |                  |                  |  |  |       |    |    |    |   |    |  |  |       |    |    |   |   |    |  |  |     |    |    |   |   |    |  |  |
|---------------------------------------------|-------------------------------------------------------------------------------------------------------------------------------------------------------------------------------------------------------------------------------------------------------------------------------------------------------------------------------------------------------------------------------------------------------------------------------------------------------------------------------------------------------------------------------------------------------------------------------------------------------------------------------------------------------------------------------------------------------------------------------------------------------------------------------------------------------------------------------------------------------------------------------------------------------------------------------------------------------------------------------------------------------------------------------------------------------------------------------------------------------------------------------------------------------------------------------------------------------------------------------------------------------------------------------------------------------------------------------------------------------------------------------------------------------------------------------------------------------------------------------------------------------------------------------------------------------------------------------|------------------|------------------|------------------|---------|----|---------|-----|-----|-------|-------|-----|-------------------------------------------|-------|----|----|---|-------|------------------|------------------|------------------|------------------|---------|------------------|------------------|------------------|------------------|---------------------------------------------|---|---|---|------------------------------------------------------------------------------------------------------------------------------------------------------------------------------------------------------------------------------------------------------------------------------------------------------------------------------------------------------------------------------------------------------------------------------------------------------------------------------------------------------------------------------------------------------------------------------------------------------------------------------------------------------------------------------------------------------------------------------------------------------------------------------------------------------------------------------------------------------------------------------------------------------------------------------------------------------------------------------------------------------------------------------------------------------------------------------------------------------------------------------------------------------------------------------------------------------------------------------------------------------------------------------------------------------------------------------|-------------|------------------|------------------|------------------|------------------|---------|------------------|------------------|------------------|------------------|--|--|-------|----|----|----|---|----|--|--|-------|----|----|---|---|----|--|--|-----|----|----|---|---|----|--|--|
| Ries et al., 1994                           | <p><b>5-year relative survival</b></p> <p><b>Male</b></p> <hr/> <p style="text-align: center;">Stage</p> <hr/> <table border="1" style="width: 100%; border-collapse: collapse;"> <thead> <tr> <th style="text-align: left;">Age (years)</th> <th style="text-align: center;">I</th> <th style="text-align: center;">II</th> <th style="text-align: center;">III</th> <th style="text-align: center;">IV</th> <th style="text-align: center;">Unknown</th> </tr> </thead> <tbody> <tr> <td>&lt;45</td> <td style="text-align: center;">69</td> <td style="text-align: center;">51</td> <td style="text-align: center;">9</td> <td style="text-align: center;">-</td> <td style="text-align: center;">15</td> </tr> <tr> <td>45-64</td> <td style="text-align: center;">53</td> <td style="text-align: center;">27</td> <td style="text-align: center;">8</td> <td style="text-align: center;">1</td> <td style="text-align: center;">10</td> </tr> <tr> <td>65-74</td> <td style="text-align: center;">43</td> <td style="text-align: center;">27</td> <td style="text-align: center;">5</td> <td style="text-align: center;">1</td> <td style="text-align: center;">7</td> </tr> <tr> <td>≥75</td> <td style="text-align: center;">35</td> <td style="text-align: center;">16</td> <td style="text-align: center;">3</td> <td style="text-align: center;">1</td> <td style="text-align: center;">5</td> </tr> </tbody> </table> <hr/>                                                                                                                                        | Age (years)      | I                | II               | III     | IV | Unknown | <45 | 69  | 51    | 9     | -   | 15                                        | 45-64 | 53 | 27 | 8 | 1     | 10               | 65-74            | 43               | 27               | 5       | 1                | 7                | ≥75              | 35               | 16                                          | 3 | 1 | 5 | <p><b>Female</b></p> <hr/> <p style="text-align: center;">Stage</p> <hr/> <table border="1" style="width: 100%; border-collapse: collapse;"> <thead> <tr> <th style="text-align: left;">Age (years)</th> <th style="text-align: center;">I</th> <th style="text-align: center;">II</th> <th style="text-align: center;">III</th> </tr> </thead> <tbody> <tr> <td>&lt;45</td> <td style="text-align: center;">81</td> <td style="text-align: center;">54</td> <td style="text-align: center;">18</td> </tr> <tr> <td>3</td> <td style="text-align: center;">16</td> <td></td> <td></td> </tr> <tr> <td>45-64</td> <td style="text-align: center;">63</td> <td style="text-align: center;">32</td> <td style="text-align: center;">10</td> </tr> <tr> <td>2</td> <td style="text-align: center;">15</td> <td></td> <td></td> </tr> <tr> <td>65-74</td> <td style="text-align: center;">56</td> <td style="text-align: center;">28</td> <td style="text-align: center;">7</td> </tr> <tr> <td>1</td> <td style="text-align: center;">10</td> <td></td> <td></td> </tr> <tr> <td>≥75</td> <td style="text-align: center;">44</td> <td style="text-align: center;">18</td> <td style="text-align: center;">5</td> </tr> <tr> <td>0</td> <td style="text-align: center;">10</td> <td></td> <td></td> </tr> </tbody> </table> <hr/> | Age (years) | I                | II               | III              | <45              | 81      | 54               | 18               | 3                | 16               |  |  | 45-64 | 63 | 32 | 10 | 2 | 15 |  |  | 65-74 | 56 | 28 | 7 | 1 | 10 |  |  | ≥75 | 44 | 18 | 5 | 0 | 10 |  |  |
| Age (years)                                 | I                                                                                                                                                                                                                                                                                                                                                                                                                                                                                                                                                                                                                                                                                                                                                                                                                                                                                                                                                                                                                                                                                                                                                                                                                                                                                                                                                                                                                                                                                                                                                                             | II               | III              | IV               | Unknown |    |         |     |     |       |       |     |                                           |       |    |    |   |       |                  |                  |                  |                  |         |                  |                  |                  |                  |                                             |   |   |   |                                                                                                                                                                                                                                                                                                                                                                                                                                                                                                                                                                                                                                                                                                                                                                                                                                                                                                                                                                                                                                                                                                                                                                                                                                                                                                                              |             |                  |                  |                  |                  |         |                  |                  |                  |                  |  |  |       |    |    |    |   |    |  |  |       |    |    |   |   |    |  |  |     |    |    |   |   |    |  |  |
| <45                                         | 69                                                                                                                                                                                                                                                                                                                                                                                                                                                                                                                                                                                                                                                                                                                                                                                                                                                                                                                                                                                                                                                                                                                                                                                                                                                                                                                                                                                                                                                                                                                                                                            | 51               | 9                | -                | 15      |    |         |     |     |       |       |     |                                           |       |    |    |   |       |                  |                  |                  |                  |         |                  |                  |                  |                  |                                             |   |   |   |                                                                                                                                                                                                                                                                                                                                                                                                                                                                                                                                                                                                                                                                                                                                                                                                                                                                                                                                                                                                                                                                                                                                                                                                                                                                                                                              |             |                  |                  |                  |                  |         |                  |                  |                  |                  |  |  |       |    |    |    |   |    |  |  |       |    |    |   |   |    |  |  |     |    |    |   |   |    |  |  |
| 45-64                                       | 53                                                                                                                                                                                                                                                                                                                                                                                                                                                                                                                                                                                                                                                                                                                                                                                                                                                                                                                                                                                                                                                                                                                                                                                                                                                                                                                                                                                                                                                                                                                                                                            | 27               | 8                | 1                | 10      |    |         |     |     |       |       |     |                                           |       |    |    |   |       |                  |                  |                  |                  |         |                  |                  |                  |                  |                                             |   |   |   |                                                                                                                                                                                                                                                                                                                                                                                                                                                                                                                                                                                                                                                                                                                                                                                                                                                                                                                                                                                                                                                                                                                                                                                                                                                                                                                              |             |                  |                  |                  |                  |         |                  |                  |                  |                  |  |  |       |    |    |    |   |    |  |  |       |    |    |   |   |    |  |  |     |    |    |   |   |    |  |  |
| 65-74                                       | 43                                                                                                                                                                                                                                                                                                                                                                                                                                                                                                                                                                                                                                                                                                                                                                                                                                                                                                                                                                                                                                                                                                                                                                                                                                                                                                                                                                                                                                                                                                                                                                            | 27               | 5                | 1                | 7       |    |         |     |     |       |       |     |                                           |       |    |    |   |       |                  |                  |                  |                  |         |                  |                  |                  |                  |                                             |   |   |   |                                                                                                                                                                                                                                                                                                                                                                                                                                                                                                                                                                                                                                                                                                                                                                                                                                                                                                                                                                                                                                                                                                                                                                                                                                                                                                                              |             |                  |                  |                  |                  |         |                  |                  |                  |                  |  |  |       |    |    |    |   |    |  |  |       |    |    |   |   |    |  |  |     |    |    |   |   |    |  |  |
| ≥75                                         | 35                                                                                                                                                                                                                                                                                                                                                                                                                                                                                                                                                                                                                                                                                                                                                                                                                                                                                                                                                                                                                                                                                                                                                                                                                                                                                                                                                                                                                                                                                                                                                                            | 16               | 3                | 1                | 5       |    |         |     |     |       |       |     |                                           |       |    |    |   |       |                  |                  |                  |                  |         |                  |                  |                  |                  |                                             |   |   |   |                                                                                                                                                                                                                                                                                                                                                                                                                                                                                                                                                                                                                                                                                                                                                                                                                                                                                                                                                                                                                                                                                                                                                                                                                                                                                                                              |             |                  |                  |                  |                  |         |                  |                  |                  |                  |  |  |       |    |    |    |   |    |  |  |       |    |    |   |   |    |  |  |     |    |    |   |   |    |  |  |
| Age (years)                                 | I                                                                                                                                                                                                                                                                                                                                                                                                                                                                                                                                                                                                                                                                                                                                                                                                                                                                                                                                                                                                                                                                                                                                                                                                                                                                                                                                                                                                                                                                                                                                                                             | II               | III              |                  |         |    |         |     |     |       |       |     |                                           |       |    |    |   |       |                  |                  |                  |                  |         |                  |                  |                  |                  |                                             |   |   |   |                                                                                                                                                                                                                                                                                                                                                                                                                                                                                                                                                                                                                                                                                                                                                                                                                                                                                                                                                                                                                                                                                                                                                                                                                                                                                                                              |             |                  |                  |                  |                  |         |                  |                  |                  |                  |  |  |       |    |    |    |   |    |  |  |       |    |    |   |   |    |  |  |     |    |    |   |   |    |  |  |
| <45                                         | 81                                                                                                                                                                                                                                                                                                                                                                                                                                                                                                                                                                                                                                                                                                                                                                                                                                                                                                                                                                                                                                                                                                                                                                                                                                                                                                                                                                                                                                                                                                                                                                            | 54               | 18               |                  |         |    |         |     |     |       |       |     |                                           |       |    |    |   |       |                  |                  |                  |                  |         |                  |                  |                  |                  |                                             |   |   |   |                                                                                                                                                                                                                                                                                                                                                                                                                                                                                                                                                                                                                                                                                                                                                                                                                                                                                                                                                                                                                                                                                                                                                                                                                                                                                                                              |             |                  |                  |                  |                  |         |                  |                  |                  |                  |  |  |       |    |    |    |   |    |  |  |       |    |    |   |   |    |  |  |     |    |    |   |   |    |  |  |
| 3                                           | 16                                                                                                                                                                                                                                                                                                                                                                                                                                                                                                                                                                                                                                                                                                                                                                                                                                                                                                                                                                                                                                                                                                                                                                                                                                                                                                                                                                                                                                                                                                                                                                            |                  |                  |                  |         |    |         |     |     |       |       |     |                                           |       |    |    |   |       |                  |                  |                  |                  |         |                  |                  |                  |                  |                                             |   |   |   |                                                                                                                                                                                                                                                                                                                                                                                                                                                                                                                                                                                                                                                                                                                                                                                                                                                                                                                                                                                                                                                                                                                                                                                                                                                                                                                              |             |                  |                  |                  |                  |         |                  |                  |                  |                  |  |  |       |    |    |    |   |    |  |  |       |    |    |   |   |    |  |  |     |    |    |   |   |    |  |  |
| 45-64                                       | 63                                                                                                                                                                                                                                                                                                                                                                                                                                                                                                                                                                                                                                                                                                                                                                                                                                                                                                                                                                                                                                                                                                                                                                                                                                                                                                                                                                                                                                                                                                                                                                            | 32               | 10               |                  |         |    |         |     |     |       |       |     |                                           |       |    |    |   |       |                  |                  |                  |                  |         |                  |                  |                  |                  |                                             |   |   |   |                                                                                                                                                                                                                                                                                                                                                                                                                                                                                                                                                                                                                                                                                                                                                                                                                                                                                                                                                                                                                                                                                                                                                                                                                                                                                                                              |             |                  |                  |                  |                  |         |                  |                  |                  |                  |  |  |       |    |    |    |   |    |  |  |       |    |    |   |   |    |  |  |     |    |    |   |   |    |  |  |
| 2                                           | 15                                                                                                                                                                                                                                                                                                                                                                                                                                                                                                                                                                                                                                                                                                                                                                                                                                                                                                                                                                                                                                                                                                                                                                                                                                                                                                                                                                                                                                                                                                                                                                            |                  |                  |                  |         |    |         |     |     |       |       |     |                                           |       |    |    |   |       |                  |                  |                  |                  |         |                  |                  |                  |                  |                                             |   |   |   |                                                                                                                                                                                                                                                                                                                                                                                                                                                                                                                                                                                                                                                                                                                                                                                                                                                                                                                                                                                                                                                                                                                                                                                                                                                                                                                              |             |                  |                  |                  |                  |         |                  |                  |                  |                  |  |  |       |    |    |    |   |    |  |  |       |    |    |   |   |    |  |  |     |    |    |   |   |    |  |  |
| 65-74                                       | 56                                                                                                                                                                                                                                                                                                                                                                                                                                                                                                                                                                                                                                                                                                                                                                                                                                                                                                                                                                                                                                                                                                                                                                                                                                                                                                                                                                                                                                                                                                                                                                            | 28               | 7                |                  |         |    |         |     |     |       |       |     |                                           |       |    |    |   |       |                  |                  |                  |                  |         |                  |                  |                  |                  |                                             |   |   |   |                                                                                                                                                                                                                                                                                                                                                                                                                                                                                                                                                                                                                                                                                                                                                                                                                                                                                                                                                                                                                                                                                                                                                                                                                                                                                                                              |             |                  |                  |                  |                  |         |                  |                  |                  |                  |  |  |       |    |    |    |   |    |  |  |       |    |    |   |   |    |  |  |     |    |    |   |   |    |  |  |
| 1                                           | 10                                                                                                                                                                                                                                                                                                                                                                                                                                                                                                                                                                                                                                                                                                                                                                                                                                                                                                                                                                                                                                                                                                                                                                                                                                                                                                                                                                                                                                                                                                                                                                            |                  |                  |                  |         |    |         |     |     |       |       |     |                                           |       |    |    |   |       |                  |                  |                  |                  |         |                  |                  |                  |                  |                                             |   |   |   |                                                                                                                                                                                                                                                                                                                                                                                                                                                                                                                                                                                                                                                                                                                                                                                                                                                                                                                                                                                                                                                                                                                                                                                                                                                                                                                              |             |                  |                  |                  |                  |         |                  |                  |                  |                  |  |  |       |    |    |    |   |    |  |  |       |    |    |   |   |    |  |  |     |    |    |   |   |    |  |  |
| ≥75                                         | 44                                                                                                                                                                                                                                                                                                                                                                                                                                                                                                                                                                                                                                                                                                                                                                                                                                                                                                                                                                                                                                                                                                                                                                                                                                                                                                                                                                                                                                                                                                                                                                            | 18               | 5                |                  |         |    |         |     |     |       |       |     |                                           |       |    |    |   |       |                  |                  |                  |                  |         |                  |                  |                  |                  |                                             |   |   |   |                                                                                                                                                                                                                                                                                                                                                                                                                                                                                                                                                                                                                                                                                                                                                                                                                                                                                                                                                                                                                                                                                                                                                                                                                                                                                                                              |             |                  |                  |                  |                  |         |                  |                  |                  |                  |  |  |       |    |    |    |   |    |  |  |       |    |    |   |   |    |  |  |     |    |    |   |   |    |  |  |
| 0                                           | 10                                                                                                                                                                                                                                                                                                                                                                                                                                                                                                                                                                                                                                                                                                                                                                                                                                                                                                                                                                                                                                                                                                                                                                                                                                                                                                                                                                                                                                                                                                                                                                            |                  |                  |                  |         |    |         |     |     |       |       |     |                                           |       |    |    |   |       |                  |                  |                  |                  |         |                  |                  |                  |                  |                                             |   |   |   |                                                                                                                                                                                                                                                                                                                                                                                                                                                                                                                                                                                                                                                                                                                                                                                                                                                                                                                                                                                                                                                                                                                                                                                                                                                                                                                              |             |                  |                  |                  |                  |         |                  |                  |                  |                  |  |  |       |    |    |    |   |    |  |  |       |    |    |   |   |    |  |  |     |    |    |   |   |    |  |  |
| Sigel et al., 2009                          | <hr/> <table border="1" style="width: 100%; border-collapse: collapse;"> <thead> <tr> <th></th> <th colspan="4" style="text-align: center;">Age (years)</th> </tr> <tr> <th></th> <th style="text-align: center;">&lt;60</th> <th style="text-align: center;">61-69</th> <th style="text-align: center;">70-79</th> <th style="text-align: center;">≥80</th> </tr> </thead> <tbody> <tr> <td colspan="5"><b>Resected: 5-year relative survival</b></td> </tr> <tr> <td>Males</td> <td style="text-align: center;">69.2 (66.7-71.6)</td> <td style="text-align: center;">66.0 (63.9-68.1)</td> <td style="text-align: center;">62.8 (60.4-65.2)</td> <td style="text-align: center;">63.5 (56.6-70.4)</td> </tr> <tr> <td>Females</td> <td style="text-align: center;">78.5 (76.4-80.6)</td> <td style="text-align: center;">75.6 (73.5-77.6)</td> <td style="text-align: center;">71.2 (69.0-73.5)</td> <td style="text-align: center;">78.1 (72.0-84.2)</td> </tr> <tr> <td colspan="5"><b>Unresected: 2-year relative survival</b></td> </tr> <tr> <td>Males</td> <td style="text-align: center;">53.4 (45.2-61.7)</td> <td style="text-align: center;">54.6 (49.4-59.8)</td> <td style="text-align: center;">48.5 (44.4-52.6)</td> <td style="text-align: center;">51.1 (45.1-57.3)</td> </tr> <tr> <td>Females</td> <td style="text-align: center;">55.4 (45.1-65.7)</td> <td style="text-align: center;">58.3 (52.9-63.8)</td> <td style="text-align: center;">55.9 (51.5-60.3)</td> <td style="text-align: center;">59.6 (53.8-65.4)</td> </tr> </tbody> </table> <hr/> |                  |                  | Age (years)      |         |    |         |     | <60 | 61-69 | 70-79 | ≥80 | <b>Resected: 5-year relative survival</b> |       |    |    |   | Males | 69.2 (66.7-71.6) | 66.0 (63.9-68.1) | 62.8 (60.4-65.2) | 63.5 (56.6-70.4) | Females | 78.5 (76.4-80.6) | 75.6 (73.5-77.6) | 71.2 (69.0-73.5) | 78.1 (72.0-84.2) | <b>Unresected: 2-year relative survival</b> |   |   |   |                                                                                                                                                                                                                                                                                                                                                                                                                                                                                                                                                                                                                                                                                                                                                                                                                                                                                                                                                                                                                                                                                                                                                                                                                                                                                                                              | Males       | 53.4 (45.2-61.7) | 54.6 (49.4-59.8) | 48.5 (44.4-52.6) | 51.1 (45.1-57.3) | Females | 55.4 (45.1-65.7) | 58.3 (52.9-63.8) | 55.9 (51.5-60.3) | 59.6 (53.8-65.4) |  |  |       |    |    |    |   |    |  |  |       |    |    |   |   |    |  |  |     |    |    |   |   |    |  |  |
|                                             | Age (years)                                                                                                                                                                                                                                                                                                                                                                                                                                                                                                                                                                                                                                                                                                                                                                                                                                                                                                                                                                                                                                                                                                                                                                                                                                                                                                                                                                                                                                                                                                                                                                   |                  |                  |                  |         |    |         |     |     |       |       |     |                                           |       |    |    |   |       |                  |                  |                  |                  |         |                  |                  |                  |                  |                                             |   |   |   |                                                                                                                                                                                                                                                                                                                                                                                                                                                                                                                                                                                                                                                                                                                                                                                                                                                                                                                                                                                                                                                                                                                                                                                                                                                                                                                              |             |                  |                  |                  |                  |         |                  |                  |                  |                  |  |  |       |    |    |    |   |    |  |  |       |    |    |   |   |    |  |  |     |    |    |   |   |    |  |  |
|                                             | <60                                                                                                                                                                                                                                                                                                                                                                                                                                                                                                                                                                                                                                                                                                                                                                                                                                                                                                                                                                                                                                                                                                                                                                                                                                                                                                                                                                                                                                                                                                                                                                           | 61-69            | 70-79            | ≥80              |         |    |         |     |     |       |       |     |                                           |       |    |    |   |       |                  |                  |                  |                  |         |                  |                  |                  |                  |                                             |   |   |   |                                                                                                                                                                                                                                                                                                                                                                                                                                                                                                                                                                                                                                                                                                                                                                                                                                                                                                                                                                                                                                                                                                                                                                                                                                                                                                                              |             |                  |                  |                  |                  |         |                  |                  |                  |                  |  |  |       |    |    |    |   |    |  |  |       |    |    |   |   |    |  |  |     |    |    |   |   |    |  |  |
| <b>Resected: 5-year relative survival</b>   |                                                                                                                                                                                                                                                                                                                                                                                                                                                                                                                                                                                                                                                                                                                                                                                                                                                                                                                                                                                                                                                                                                                                                                                                                                                                                                                                                                                                                                                                                                                                                                               |                  |                  |                  |         |    |         |     |     |       |       |     |                                           |       |    |    |   |       |                  |                  |                  |                  |         |                  |                  |                  |                  |                                             |   |   |   |                                                                                                                                                                                                                                                                                                                                                                                                                                                                                                                                                                                                                                                                                                                                                                                                                                                                                                                                                                                                                                                                                                                                                                                                                                                                                                                              |             |                  |                  |                  |                  |         |                  |                  |                  |                  |  |  |       |    |    |    |   |    |  |  |       |    |    |   |   |    |  |  |     |    |    |   |   |    |  |  |
| Males                                       | 69.2 (66.7-71.6)                                                                                                                                                                                                                                                                                                                                                                                                                                                                                                                                                                                                                                                                                                                                                                                                                                                                                                                                                                                                                                                                                                                                                                                                                                                                                                                                                                                                                                                                                                                                                              | 66.0 (63.9-68.1) | 62.8 (60.4-65.2) | 63.5 (56.6-70.4) |         |    |         |     |     |       |       |     |                                           |       |    |    |   |       |                  |                  |                  |                  |         |                  |                  |                  |                  |                                             |   |   |   |                                                                                                                                                                                                                                                                                                                                                                                                                                                                                                                                                                                                                                                                                                                                                                                                                                                                                                                                                                                                                                                                                                                                                                                                                                                                                                                              |             |                  |                  |                  |                  |         |                  |                  |                  |                  |  |  |       |    |    |    |   |    |  |  |       |    |    |   |   |    |  |  |     |    |    |   |   |    |  |  |
| Females                                     | 78.5 (76.4-80.6)                                                                                                                                                                                                                                                                                                                                                                                                                                                                                                                                                                                                                                                                                                                                                                                                                                                                                                                                                                                                                                                                                                                                                                                                                                                                                                                                                                                                                                                                                                                                                              | 75.6 (73.5-77.6) | 71.2 (69.0-73.5) | 78.1 (72.0-84.2) |         |    |         |     |     |       |       |     |                                           |       |    |    |   |       |                  |                  |                  |                  |         |                  |                  |                  |                  |                                             |   |   |   |                                                                                                                                                                                                                                                                                                                                                                                                                                                                                                                                                                                                                                                                                                                                                                                                                                                                                                                                                                                                                                                                                                                                                                                                                                                                                                                              |             |                  |                  |                  |                  |         |                  |                  |                  |                  |  |  |       |    |    |    |   |    |  |  |       |    |    |   |   |    |  |  |     |    |    |   |   |    |  |  |
| <b>Unresected: 2-year relative survival</b> |                                                                                                                                                                                                                                                                                                                                                                                                                                                                                                                                                                                                                                                                                                                                                                                                                                                                                                                                                                                                                                                                                                                                                                                                                                                                                                                                                                                                                                                                                                                                                                               |                  |                  |                  |         |    |         |     |     |       |       |     |                                           |       |    |    |   |       |                  |                  |                  |                  |         |                  |                  |                  |                  |                                             |   |   |   |                                                                                                                                                                                                                                                                                                                                                                                                                                                                                                                                                                                                                                                                                                                                                                                                                                                                                                                                                                                                                                                                                                                                                                                                                                                                                                                              |             |                  |                  |                  |                  |         |                  |                  |                  |                  |  |  |       |    |    |    |   |    |  |  |       |    |    |   |   |    |  |  |     |    |    |   |   |    |  |  |
| Males                                       | 53.4 (45.2-61.7)                                                                                                                                                                                                                                                                                                                                                                                                                                                                                                                                                                                                                                                                                                                                                                                                                                                                                                                                                                                                                                                                                                                                                                                                                                                                                                                                                                                                                                                                                                                                                              | 54.6 (49.4-59.8) | 48.5 (44.4-52.6) | 51.1 (45.1-57.3) |         |    |         |     |     |       |       |     |                                           |       |    |    |   |       |                  |                  |                  |                  |         |                  |                  |                  |                  |                                             |   |   |   |                                                                                                                                                                                                                                                                                                                                                                                                                                                                                                                                                                                                                                                                                                                                                                                                                                                                                                                                                                                                                                                                                                                                                                                                                                                                                                                              |             |                  |                  |                  |                  |         |                  |                  |                  |                  |  |  |       |    |    |    |   |    |  |  |       |    |    |   |   |    |  |  |     |    |    |   |   |    |  |  |
| Females                                     | 55.4 (45.1-65.7)                                                                                                                                                                                                                                                                                                                                                                                                                                                                                                                                                                                                                                                                                                                                                                                                                                                                                                                                                                                                                                                                                                                                                                                                                                                                                                                                                                                                                                                                                                                                                              | 58.3 (52.9-63.8) | 55.9 (51.5-60.3) | 59.6 (53.8-65.4) |         |    |         |     |     |       |       |     |                                           |       |    |    |   |       |                  |                  |                  |                  |         |                  |                  |                  |                  |                                             |   |   |   |                                                                                                                                                                                                                                                                                                                                                                                                                                                                                                                                                                                                                                                                                                                                                                                                                                                                                                                                                                                                                                                                                                                                                                                                                                                                                                                              |             |                  |                  |                  |                  |         |                  |                  |                  |                  |  |  |       |    |    |    |   |    |  |  |       |    |    |   |   |    |  |  |     |    |    |   |   |    |  |  |

| First author, date       | Results                                        |            |            |
|--------------------------|------------------------------------------------|------------|------------|
| Driessen et al.,<br>2017 | <b>Median relative survival months (95%CI)</b> |            |            |
|                          | <b>Stage I</b>                                 |            |            |
|                          | Age (years)                                    |            |            |
|                          | <70                                            | ≥70        |            |
|                          | Year of diagnosis                              |            |            |
|                          | 1990-94                                        | 44 (41-47) | 16 (15-17) |
|                          | 1995-99                                        | 52 (48-56) | 17 (16-19) |
|                          | 2000-04                                        | 70 (66-76) | 22 (21-24) |
|                          | 2005-09                                        | 85 (82-92) | 34 (32-37) |
|                          | 2010-14                                        | NA         | 47 (44-50) |
|                          | <b>Stage II</b>                                |            |            |
|                          | Age                                            |            |            |
|                          | (years)                                        |            |            |
|                          | ≥70                                            |            |            |
|                          | <70                                            |            |            |
|                          | Year of diagnosis                              |            |            |
|                          | 1990-94                                        | 25 (23-28) | 16         |
|                          | (33-43)                                        |            |            |
|                          | 1995-99                                        | 27 (24-29) | 13         |
|                          | (12-15)                                        |            |            |
|                          | 2000-04                                        | 28 (25-30) | 13         |
|                          | (12-14)                                        |            |            |
|                          | 2005-09                                        | 38 (33-43) | 18         |
|                          | (16-19)                                        |            |            |
|                          | 2010-14                                        | 58 (52-64) | 22         |
|                          | (20-23)                                        |            |            |

| First author, date            |                                                                                                                                                                                                                                                                                                                                                                                                                                                                                                                                                                                                                                                                                                                                                                                                                                                                                                                                                                                                                     |               | Results |     |     |                   |  |  |         |         |         |         |          |         |         |            |         |         |            |         |         |            |            |                                                                                                                                                                                                                                                                                                                                                                                                                                                                                                                                                                                                                                                                                                                                                                                                                                                                                                                                                                                                                                                                       |  |  |     |     |                   |  |  |         |               |               |         |               |               |         |               |               |         |               |               |         |               |               |
|-------------------------------|---------------------------------------------------------------------------------------------------------------------------------------------------------------------------------------------------------------------------------------------------------------------------------------------------------------------------------------------------------------------------------------------------------------------------------------------------------------------------------------------------------------------------------------------------------------------------------------------------------------------------------------------------------------------------------------------------------------------------------------------------------------------------------------------------------------------------------------------------------------------------------------------------------------------------------------------------------------------------------------------------------------------|---------------|---------|-----|-----|-------------------|--|--|---------|---------|---------|---------|----------|---------|---------|------------|---------|---------|------------|---------|---------|------------|------------|-----------------------------------------------------------------------------------------------------------------------------------------------------------------------------------------------------------------------------------------------------------------------------------------------------------------------------------------------------------------------------------------------------------------------------------------------------------------------------------------------------------------------------------------------------------------------------------------------------------------------------------------------------------------------------------------------------------------------------------------------------------------------------------------------------------------------------------------------------------------------------------------------------------------------------------------------------------------------------------------------------------------------------------------------------------------------|--|--|-----|-----|-------------------|--|--|---------|---------------|---------------|---------|---------------|---------------|---------|---------------|---------------|---------|---------------|---------------|---------|---------------|---------------|
|                               | <p><b>Stage III</b></p> <p style="text-align: center;">-----<br/>Age (years)<br/>-----</p> <table border="1" style="margin-left: auto; margin-right: auto;"> <thead> <tr> <th></th> <th style="text-align: center;">&lt;70</th> <th style="text-align: center;">≥70</th> </tr> </thead> <tbody> <tr> <td>Year of diagnosis</td> <td></td> <td></td> </tr> <tr> <td>1990-94</td> <td style="text-align: center;">9 (9-9)</td> <td style="text-align: center;">6 (6-7)</td> </tr> <tr> <td>1995-99</td> <td style="text-align: center;">9 (9-10)</td> <td style="text-align: center;">6 (6-7)</td> </tr> <tr> <td>2000-04</td> <td style="text-align: center;">11 (10-11)</td> <td style="text-align: center;">7 (7-7)</td> </tr> <tr> <td>2005-09</td> <td style="text-align: center;">14 (13-14)</td> <td style="text-align: center;">8 (8-8)</td> </tr> <tr> <td>2010-14</td> <td style="text-align: center;">18 (17-18)</td> <td style="text-align: center;">10 (10-11)</td> </tr> </tbody> </table> <p>-----</p> |               |         | <70 | ≥70 | Year of diagnosis |  |  | 1990-94 | 9 (9-9) | 6 (6-7) | 1995-99 | 9 (9-10) | 6 (6-7) | 2000-04 | 11 (10-11) | 7 (7-7) | 2005-09 | 14 (13-14) | 8 (8-8) | 2010-14 | 18 (17-18) | 10 (10-11) | <p><b>Stage IV</b></p> <p style="text-align: center;">-----<br/>Age<br/>(years)<br/>-----</p> <table border="1" style="margin-left: auto; margin-right: auto;"> <thead> <tr> <th></th> <th style="text-align: center;">&lt;70</th> <th style="text-align: center;">≥70</th> </tr> </thead> <tbody> <tr> <td>Year of diagnosis</td> <td></td> <td></td> </tr> <tr> <td>1990-94</td> <td style="text-align: center;">3.5 (3.3-3.6)</td> <td style="text-align: center;">2.6 (2.4-2.8)</td> </tr> <tr> <td>1995-99</td> <td style="text-align: center;">3.6 (3.5-3.8)</td> <td style="text-align: center;">2.6 (2.5-2.8)</td> </tr> <tr> <td>2000-04</td> <td style="text-align: center;">4.5 (4.4-4.7)</td> <td style="text-align: center;">3.0 (2.8-3.1)</td> </tr> <tr> <td>2005-09</td> <td style="text-align: center;">5.3 (5.2-5.5)</td> <td style="text-align: center;">3.2 (3.1-3.4)</td> </tr> <tr> <td>2010-14</td> <td style="text-align: center;">5.7 (5.5-5.8)</td> <td style="text-align: center;">3.4 (3.3-3.5)</td> </tr> </tbody> </table> <p>-----</p> |  |  | <70 | ≥70 | Year of diagnosis |  |  | 1990-94 | 3.5 (3.3-3.6) | 2.6 (2.4-2.8) | 1995-99 | 3.6 (3.5-3.8) | 2.6 (2.5-2.8) | 2000-04 | 4.5 (4.4-4.7) | 3.0 (2.8-3.1) | 2005-09 | 5.3 (5.2-5.5) | 3.2 (3.1-3.4) | 2010-14 | 5.7 (5.5-5.8) | 3.4 (3.3-3.5) |
|                               | <70                                                                                                                                                                                                                                                                                                                                                                                                                                                                                                                                                                                                                                                                                                                                                                                                                                                                                                                                                                                                                 | ≥70           |         |     |     |                   |  |  |         |         |         |         |          |         |         |            |         |         |            |         |         |            |            |                                                                                                                                                                                                                                                                                                                                                                                                                                                                                                                                                                                                                                                                                                                                                                                                                                                                                                                                                                                                                                                                       |  |  |     |     |                   |  |  |         |               |               |         |               |               |         |               |               |         |               |               |         |               |               |
| Year of diagnosis             |                                                                                                                                                                                                                                                                                                                                                                                                                                                                                                                                                                                                                                                                                                                                                                                                                                                                                                                                                                                                                     |               |         |     |     |                   |  |  |         |         |         |         |          |         |         |            |         |         |            |         |         |            |            |                                                                                                                                                                                                                                                                                                                                                                                                                                                                                                                                                                                                                                                                                                                                                                                                                                                                                                                                                                                                                                                                       |  |  |     |     |                   |  |  |         |               |               |         |               |               |         |               |               |         |               |               |         |               |               |
| 1990-94                       | 9 (9-9)                                                                                                                                                                                                                                                                                                                                                                                                                                                                                                                                                                                                                                                                                                                                                                                                                                                                                                                                                                                                             | 6 (6-7)       |         |     |     |                   |  |  |         |         |         |         |          |         |         |            |         |         |            |         |         |            |            |                                                                                                                                                                                                                                                                                                                                                                                                                                                                                                                                                                                                                                                                                                                                                                                                                                                                                                                                                                                                                                                                       |  |  |     |     |                   |  |  |         |               |               |         |               |               |         |               |               |         |               |               |         |               |               |
| 1995-99                       | 9 (9-10)                                                                                                                                                                                                                                                                                                                                                                                                                                                                                                                                                                                                                                                                                                                                                                                                                                                                                                                                                                                                            | 6 (6-7)       |         |     |     |                   |  |  |         |         |         |         |          |         |         |            |         |         |            |         |         |            |            |                                                                                                                                                                                                                                                                                                                                                                                                                                                                                                                                                                                                                                                                                                                                                                                                                                                                                                                                                                                                                                                                       |  |  |     |     |                   |  |  |         |               |               |         |               |               |         |               |               |         |               |               |         |               |               |
| 2000-04                       | 11 (10-11)                                                                                                                                                                                                                                                                                                                                                                                                                                                                                                                                                                                                                                                                                                                                                                                                                                                                                                                                                                                                          | 7 (7-7)       |         |     |     |                   |  |  |         |         |         |         |          |         |         |            |         |         |            |         |         |            |            |                                                                                                                                                                                                                                                                                                                                                                                                                                                                                                                                                                                                                                                                                                                                                                                                                                                                                                                                                                                                                                                                       |  |  |     |     |                   |  |  |         |               |               |         |               |               |         |               |               |         |               |               |         |               |               |
| 2005-09                       | 14 (13-14)                                                                                                                                                                                                                                                                                                                                                                                                                                                                                                                                                                                                                                                                                                                                                                                                                                                                                                                                                                                                          | 8 (8-8)       |         |     |     |                   |  |  |         |         |         |         |          |         |         |            |         |         |            |         |         |            |            |                                                                                                                                                                                                                                                                                                                                                                                                                                                                                                                                                                                                                                                                                                                                                                                                                                                                                                                                                                                                                                                                       |  |  |     |     |                   |  |  |         |               |               |         |               |               |         |               |               |         |               |               |         |               |               |
| 2010-14                       | 18 (17-18)                                                                                                                                                                                                                                                                                                                                                                                                                                                                                                                                                                                                                                                                                                                                                                                                                                                                                                                                                                                                          | 10 (10-11)    |         |     |     |                   |  |  |         |         |         |         |          |         |         |            |         |         |            |         |         |            |            |                                                                                                                                                                                                                                                                                                                                                                                                                                                                                                                                                                                                                                                                                                                                                                                                                                                                                                                                                                                                                                                                       |  |  |     |     |                   |  |  |         |               |               |         |               |               |         |               |               |         |               |               |         |               |               |
|                               | <70                                                                                                                                                                                                                                                                                                                                                                                                                                                                                                                                                                                                                                                                                                                                                                                                                                                                                                                                                                                                                 | ≥70           |         |     |     |                   |  |  |         |         |         |         |          |         |         |            |         |         |            |         |         |            |            |                                                                                                                                                                                                                                                                                                                                                                                                                                                                                                                                                                                                                                                                                                                                                                                                                                                                                                                                                                                                                                                                       |  |  |     |     |                   |  |  |         |               |               |         |               |               |         |               |               |         |               |               |         |               |               |
| Year of diagnosis             |                                                                                                                                                                                                                                                                                                                                                                                                                                                                                                                                                                                                                                                                                                                                                                                                                                                                                                                                                                                                                     |               |         |     |     |                   |  |  |         |         |         |         |          |         |         |            |         |         |            |         |         |            |            |                                                                                                                                                                                                                                                                                                                                                                                                                                                                                                                                                                                                                                                                                                                                                                                                                                                                                                                                                                                                                                                                       |  |  |     |     |                   |  |  |         |               |               |         |               |               |         |               |               |         |               |               |         |               |               |
| 1990-94                       | 3.5 (3.3-3.6)                                                                                                                                                                                                                                                                                                                                                                                                                                                                                                                                                                                                                                                                                                                                                                                                                                                                                                                                                                                                       | 2.6 (2.4-2.8) |         |     |     |                   |  |  |         |         |         |         |          |         |         |            |         |         |            |         |         |            |            |                                                                                                                                                                                                                                                                                                                                                                                                                                                                                                                                                                                                                                                                                                                                                                                                                                                                                                                                                                                                                                                                       |  |  |     |     |                   |  |  |         |               |               |         |               |               |         |               |               |         |               |               |         |               |               |
| 1995-99                       | 3.6 (3.5-3.8)                                                                                                                                                                                                                                                                                                                                                                                                                                                                                                                                                                                                                                                                                                                                                                                                                                                                                                                                                                                                       | 2.6 (2.5-2.8) |         |     |     |                   |  |  |         |         |         |         |          |         |         |            |         |         |            |         |         |            |            |                                                                                                                                                                                                                                                                                                                                                                                                                                                                                                                                                                                                                                                                                                                                                                                                                                                                                                                                                                                                                                                                       |  |  |     |     |                   |  |  |         |               |               |         |               |               |         |               |               |         |               |               |         |               |               |
| 2000-04                       | 4.5 (4.4-4.7)                                                                                                                                                                                                                                                                                                                                                                                                                                                                                                                                                                                                                                                                                                                                                                                                                                                                                                                                                                                                       | 3.0 (2.8-3.1) |         |     |     |                   |  |  |         |         |         |         |          |         |         |            |         |         |            |         |         |            |            |                                                                                                                                                                                                                                                                                                                                                                                                                                                                                                                                                                                                                                                                                                                                                                                                                                                                                                                                                                                                                                                                       |  |  |     |     |                   |  |  |         |               |               |         |               |               |         |               |               |         |               |               |         |               |               |
| 2005-09                       | 5.3 (5.2-5.5)                                                                                                                                                                                                                                                                                                                                                                                                                                                                                                                                                                                                                                                                                                                                                                                                                                                                                                                                                                                                       | 3.2 (3.1-3.4) |         |     |     |                   |  |  |         |         |         |         |          |         |         |            |         |         |            |         |         |            |            |                                                                                                                                                                                                                                                                                                                                                                                                                                                                                                                                                                                                                                                                                                                                                                                                                                                                                                                                                                                                                                                                       |  |  |     |     |                   |  |  |         |               |               |         |               |               |         |               |               |         |               |               |         |               |               |
| 2010-14                       | 5.7 (5.5-5.8)                                                                                                                                                                                                                                                                                                                                                                                                                                                                                                                                                                                                                                                                                                                                                                                                                                                                                                                                                                                                       | 3.4 (3.3-3.5) |         |     |     |                   |  |  |         |         |         |         |          |         |         |            |         |         |            |         |         |            |            |                                                                                                                                                                                                                                                                                                                                                                                                                                                                                                                                                                                                                                                                                                                                                                                                                                                                                                                                                                                                                                                                       |  |  |     |     |                   |  |  |         |               |               |         |               |               |         |               |               |         |               |               |         |               |               |
| <b>Small cell lung cancer</b> |                                                                                                                                                                                                                                                                                                                                                                                                                                                                                                                                                                                                                                                                                                                                                                                                                                                                                                                                                                                                                     |               |         |     |     |                   |  |  |         |         |         |         |          |         |         |            |         |         |            |         |         |            |            |                                                                                                                                                                                                                                                                                                                                                                                                                                                                                                                                                                                                                                                                                                                                                                                                                                                                                                                                                                                                                                                                       |  |  |     |     |                   |  |  |         |               |               |         |               |               |         |               |               |         |               |               |         |               |               |



| First author, date | Results                                                                                                                                                                                                                                       |  |  |  |  |                                                                                                                                                                                             |  |  |  |  |                                                                                                                                                                                                                                                                                                                                                                              |  |  |  |  |
|--------------------|-----------------------------------------------------------------------------------------------------------------------------------------------------------------------------------------------------------------------------------------------|--|--|--|--|---------------------------------------------------------------------------------------------------------------------------------------------------------------------------------------------|--|--|--|--|------------------------------------------------------------------------------------------------------------------------------------------------------------------------------------------------------------------------------------------------------------------------------------------------------------------------------------------------------------------------------|--|--|--|--|
|                    | <div style="text-align: center;"> <math>\geq 75</math>    19    6<br/> 4    -<br/> -----<br/> ----- </div>                                                                                                                                    |  |  |  |  |                                                                                                                                                                                             |  |  |  |  |                                                                                                                                                                                                                                                                                                                                                                              |  |  |  |  |
| Wang et al., 2017  | <b>1-year cancer-specific survival (% - CSS)</b><br>-----<br>Stages    III    IV<br>-----<br>Age (years)<br><50    76.5    32.6<br>50-59    67.5    31.3<br>60-69    57.2    29.0<br>70-79    45.7    22.9<br>$\geq 80$ 36.2    11.7<br>----- |  |  |  |  | -----<br>Surgery    No surgery<br>-----<br>Age (years)<br><50    84.4    46.7<br>50-59    82.6    42.2<br>60-69    70.6    38.6<br>70-79    67.6    31.7<br>$\geq 80$ 45.0    20.5<br>----- |  |  |  |  | <b>1,3 -year cancer-specific survival (% - CSS)</b><br>-----<br>Radiation    No radiation<br>-----<br>CSS    1-y    3-y    1-y    3-y<br>-----<br>Age (years)<br><50    54.6    22.1    31.7    6.2<br>50-59    52.3    17.4    28.6    5.5<br>60-69    49.4    17.6    25.9    4.2<br>70-79    42.6    15.3    22.6    4.5<br>$\geq 80$ 33.4    8.6    15.0    3.4<br>----- |  |  |  |  |
